# Supplementary material for: Unmasking the elusive 1,4-diazabutatrienes: the stabilizing role of the N-substituents
Source: Royal Society of Chemistry journal article supplement (doi:10.1039/d1cp00274k), 2021-01-01
Supplement: d1cp00274k1.pdf [file d1cp00274k1.pdf]

## **Supporting Information**

### **Unmasking the elusive 1,4-diazabutatrienes: the stabilizing role of the *N*-substituents**

Mateo Alajarin and Marta Marin-Luna\*

Departamento de Química Orgánica, Facultad de Química, Regional Campus of International Excellence "Campus Mare Nostrum", Universidad de Murcia, E-30100 Murcia, Spain. E-mail: martamarin@um.es

|                                                        |    |
|--------------------------------------------------------|----|
| 1. Computational Methods .....                         | 2  |
| 2. Relative Energies of the 1,4-Diazabutatrienes ..... | 2  |
| 3. Geometry of the 1,4-diazabutatrienes 1 .....        | 3  |
| 3. NBO charges of the 1,4-diazabutatrienes .....       | 6  |
| 3.1. Statistical Analysis involving NBO charges. ....  | 10 |
| 5. Stabilization Energies .....                        | 13 |
| 5. Computational Data .....                            | 16 |
| 6. References .....                                    | 19 |
| 7. Cartesian Coordinates .....                         | 20 |

## 1. Computational Methods

The geometries of the molecules were fully optimized by using the wB97X-D hybrid functional<sup>1</sup> in combination with the def2-TZVPD basis set.<sup>2,3</sup> The nature of minimum of all computed structures was confirmed by performing a frequency analysis at the same level of theory. Thermochemical corrections at 298.15 K were calculated for all stationary points from unscaled vibrational frequencies. The stability of the wave functions was checked for all the optimized structures.<sup>4</sup> Single point calculations of the optimized geometries were performed at the DLPNO-CSSD(T)<sup>5</sup>/ma-def2-TZVPP<sup>6</sup> theoretical level and were combined with the previous computed thermochemical corrections to yield free energies  $G_{298}$  at 298.15 K. All calculations were performed by using both the Gaussian 09<sup>7</sup> and the ORCA 4.0.1 programs.<sup>8</sup> Natural Bond Orbital analyses<sup>9</sup> were performed at the wB97XD/def2-TZVPD level with the NBO 7.0 software.<sup>10</sup>

## 2. Relative Energies of the 1,4-Diazabutatrienes

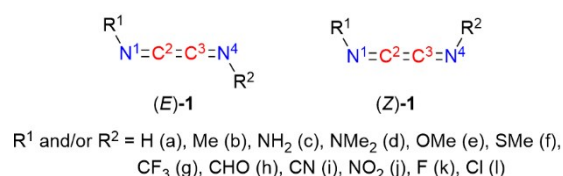

**Table S1.** Gibbs free energy difference between the (*E*)- and (*Z*)-diazabutatrienes **1** (kcal mol<sup>-1</sup>). Values are obtained as  $G_E - G_Z$

| R <sup>1</sup>   | R <sup>2</sup> |       |                 |                  |             |             |                 |             |             |                 |             |             |
|------------------|----------------|-------|-----------------|------------------|-------------|-------------|-----------------|-------------|-------------|-----------------|-------------|-------------|
|                  | H              | Me    | NH <sub>2</sub> | NMe <sub>2</sub> | OMe         | SMe         | CF <sub>3</sub> | CHO         | CN          | NO <sub>2</sub> | F           | Cl          |
| H                | -1.49          | -0.81 | -0.94           | -1.00            | -0.62       | -1.00       | -0.93           | -0.86       | -1.06       | -0.56           | -0.55       | -0.38       |
| Me               |                | -0.37 | -0.13           | -0.27            | <b>0.04</b> | -0.52       | -0.26           | -0.35       | -0.26       | <b>0.11</b>     | 0.09        | -0.07       |
| NH <sub>2</sub>  |                |       | -0.37           | -0.56            | -0.07       | -0.52       | -0.13           | <b>0.01</b> | -0.61       | <b>0.30</b>     | -0.01       | -0.10       |
| NMe <sub>2</sub> |                |       |                 | -0.59            | <b>0.01</b> | -0.82       | -0.09           | <b>0.30</b> | <b>0.05</b> | <b>0.80</b>     | <b>0.14</b> | <b>0.10</b> |
| OMe              |                |       |                 |                  | -0.35       | <b>0.32</b> | -0.50           | -0.17       | -0.58       | <b>1.59</b>     | -0.21       | -0.23       |
| SMe              |                |       |                 |                  |             | -0.34       | <b>0.13</b>     | <b>0.30</b> | <b>0.12</b> | <b>1.47</b>     | <b>0.23</b> | <b>0.52</b> |
| CF <sub>3</sub>  |                |       |                 |                  |             |             | -0.51           | -0.65       | -0.76       | -0.41           | -0.33       | -0.33       |
| CHO              |                |       |                 |                  |             |             |                 | -0.49       | -0.70       | -0.34           | -0.21       | -0.30       |
| CN               |                |       |                 |                  |             |             |                 |             | -0.92       | -0.55           | -0.48       | -0.41       |
| NO <sub>2</sub>  |                |       |                 |                  |             |             |                 |             |             | -0.15           | -0.17       | -0.14       |
| F                |                |       |                 |                  |             |             |                 |             |             |                 | -0.29       | -0.16       |
| Cl               |                |       |                 |                  |             |             |                 |             |             |                 |             | -0.18       |

**Table S2.** Enthalpy energy difference between the (*E*)- and (*Z*)-diazabutatrienes **1** (kcal mol<sup>-1</sup>). Values are obtained as  $H_E - H_Z$

| R <sup>1</sup>  | R <sup>2</sup> |       |                 |                  |       |       |                 |             |       |                 |       |       |
|-----------------|----------------|-------|-----------------|------------------|-------|-------|-----------------|-------------|-------|-----------------|-------|-------|
|                 | H              | Me    | NH <sub>2</sub> | NMe <sub>2</sub> | OMe   | SMe   | CF <sub>3</sub> | CHO         | CN    | NO <sub>2</sub> | F     | Cl    |
| H               | -1.63          | -0.97 | -1.06           | -1.09            | -0.78 | -1.00 | -1.09           | -0.45       | -1.25 | -0.99           | -0.82 | -0.45 |
| Me              |                | -0.50 | -0.17           | -0.34            | -0.01 | -0.60 | -0.44           | -0.53       | -0.38 | -0.23           | -0.05 | -0.10 |
| NH <sub>2</sub> |                |       | -0.41           | -0.61            | -0.07 | -0.50 | -0.30           | <b>0.15</b> | -0.31 | <b>0.41</b>     | -0.04 | -0.11 |

|                  |       |             |             |             |             |             |             |             |             |
|------------------|-------|-------------|-------------|-------------|-------------|-------------|-------------|-------------|-------------|
| NMe <sub>2</sub> | -0.56 | <b>0.03</b> | -0.59       | <b>0.08</b> | <b>0.38</b> | <b>0.12</b> | <b>1.50</b> | <b>0.10</b> | <b>0.06</b> |
| OMe              |       | -0.29       | <b>0.65</b> | -0.47       | -0.32       | -0.57       | <b>1.00</b> | -0.21       | -0.21       |
| SMe              |       |             | -0.73       | <b>0.21</b> | <b>0.31</b> | <b>0.10</b> | <b>1.84</b> | <b>0.19</b> | <b>0.83</b> |
| CF <sub>3</sub>  |       |             |             | -0.76       | -0.79       | -0.87       | -0.57       | -0.45       | -0.33       |
| CHO              |       |             |             |             | -0.75       | -0.85       | -0.60       | -0.36       | -0.32       |
| CN               |       |             |             |             |             | -1.04       | -0.74       | -0.58       | -0.44       |
| NO <sub>2</sub>  |       |             |             |             |             |             | -0.39       | -0.27       | -0.23       |
| F                |       |             |             |             |             |             |             | -0.31       | -0.17       |
| Cl               |       |             |             |             |             |             |             |             | -0.17       |

### 3. Geometry of the 1,4-diazabutatrienes 1

**Table S3.** Representative distances (Å), bond angles (°) and dihedral angles (°) of the 1,4-diazabutatrienes 1.

| R <sup>1</sup> | R <sup>2</sup>   |   | R <sup>1</sup> -N <sup>1</sup> | N <sup>1</sup> -C <sup>2</sup> | C <sup>2</sup> -C <sup>3</sup> | C <sup>3</sup> -N <sup>4</sup> | N <sup>4</sup> -R <sup>2</sup> | C <sup>2</sup> -N <sup>1</sup> -R <sup>1</sup> | C <sup>3</sup> -N <sup>4</sup> -R <sup>2</sup> | N <sup>1</sup> -C <sup>2</sup> -C <sup>3</sup> | C <sup>2</sup> -C <sup>3</sup> -N <sup>4</sup> | R <sup>1</sup> -N <sup>1</sup> -N <sup>4</sup> -R <sup>2</sup> |
|----------------|------------------|---|--------------------------------|--------------------------------|--------------------------------|--------------------------------|--------------------------------|------------------------------------------------|------------------------------------------------|------------------------------------------------|------------------------------------------------|----------------------------------------------------------------|
| H              | H                | E | 1.021                          | 1.237                          | 1.290                          | 1.237                          | 1.021                          | 112.8                                          | 112.8                                          | 161.0                                          | 161.0                                          | -180.0                                                         |
|                |                  | Z | 1.022                          | 1.237                          | 1.276                          | 1.237                          | 1.022                          | 113.0                                          | 113.0                                          | 174.4                                          | 174.4                                          | 0.0                                                            |
| H              | Me               | E | 1.021                          | 1.237                          | 1.284                          | 1.233                          | 1.453                          | 112.8                                          | 119.9                                          | 164.0                                          | 164.2                                          | 180.0                                                          |
|                |                  | Z | 1.021                          | 1.238                          | 1.277                          | 1.232                          | 1.453                          | 112.9                                          | 120.2                                          | 169.3                                          | 179.1                                          | 0.0                                                            |
| H              | NH <sub>2</sub>  | E | 1.018                          | 1.234                          | 1.274                          | 1.253                          | 1.340                          | 113.9                                          | 119.4                                          | 167.0                                          | 161.1                                          | -177.2                                                         |
|                |                  | Z | 1.018                          | 1.235                          | 1.268                          | 1.253                          | 1.340                          | 114.2                                          | 119.6                                          | 177.9                                          | 168.1                                          | 2.9                                                            |
| H              | NMe <sub>2</sub> | E | 1.018                          | 1.238                          | 1.269                          | 1.264                          | 1.323                          | 113.6                                          | 119.9                                          | 167.8                                          | 162.0                                          | 177.3                                                          |
|                |                  | Z | 1.018                          | 1.238                          | 1.265                          | 1.263                          | 1.323                          | 114.0                                          | 120.3                                          | 178.1                                          | 166.9                                          | 2.5                                                            |
| H              | OMe              | E | 1.018                          | 1.228                          | 1.277                          | 1.248                          | 1.371                          | 114.7                                          | 113.5                                          | 167.3                                          | 158.8                                          | -180.0                                                         |
|                |                  | Z | 1.018                          | 1.229                          | 1.271                          | 1.247                          | 1.373                          | 114.6                                          | 113.6                                          | 177.6                                          | 167.4                                          | 0.0                                                            |
| H              | SMe              | E | 1.020                          | 1.237                          | 1.273                          | 1.244                          | 1.663                          | 113.3                                          | 123.2                                          | 168.5                                          | 168.0                                          | 180.0                                                          |
|                |                  | Z | 1.020                          | 1.238                          | 1.270                          | 1.243                          | 1.664                          | 113.5                                          | 124.0                                          | 172.0                                          | 178.3                                          | 0.0                                                            |
| H              | CF <sub>3</sub>  | E | 1.021                          | 1.230                          | 1.285                          | 1.237                          | 1.436                          | 113.7                                          | 118.9                                          | 163.9                                          | 161.8                                          | 176.0                                                          |
|                |                  | Z | 1.021                          | 1.232                          | 1.274                          | 1.236                          | 1.437                          | 113.6                                          | 119.1                                          | 174.2                                          | 175.9                                          | 0.0                                                            |
| H              | CHO              | E | 1.021                          | 1.233                          | 1.284                          | 1.242                          | 1.437                          | 113.5                                          | 115.8                                          | 164.7                                          | 164.2                                          | 180.0                                                          |
|                |                  | Z | 1.022                          | 1.235                          | 1.282                          | 1.240                          | 1.441                          | 113.4                                          | 124.2                                          | 171.2                                          | 179.2                                          | 3.0                                                            |
| H              | CN               | E | 1.021                          | 1.230                          | 1.284                          | 1.246                          | 1.340                          | 113.9                                          | 121.9                                          | 162.9                                          | 159.2                                          | -180.0                                                         |
|                |                  | Z | 1.021                          | 1.232                          | 1.271                          | 1.246                          | 1.341                          | 113.9                                          | 121.6                                          | 176.8                                          | 171.5                                          | 0.0                                                            |
| H              | NO <sub>2</sub>  | E | 1.019                          | 1.223                          | 1.286                          | 1.238                          | 1.479                          | 115.2                                          | 113.3                                          | 165.4                                          | 159.7                                          | -180.0                                                         |
|                |                  | Z | 1.020                          | 1.225                          | 1.276                          | 1.237                          | 1.484                          | 114.9                                          | 113.3                                          | 175.2                                          | 173.7                                          | 0.0                                                            |
| H              | F                | E | 1.017                          | 1.216                          | 1.286                          | 1.239                          | 1.415                          | 116.9                                          | 110.4                                          | 167.2                                          | 154.4                                          | 180.0                                                          |
|                |                  | Z | 1.018                          | 1.218                          | 1.277                          | 1.236                          | 1.421                          | 116.5                                          | 110.2                                          | 176.8                                          | 167.5                                          | 0.0                                                            |
| H              | Cl               | E | 1.019                          | 1.225                          | 1.280                          | 1.235                          | 1.762                          | 115.0                                          | 114.3                                          | 169.2                                          | 164.5                                          | 180.0                                                          |
|                |                  | Z | 1.020                          | 1.225                          | 1.277                          | 1.233                          | 1.768                          | 115.0                                          | 114.3                                          | 172.5                                          | 176.7                                          | 0.0                                                            |
| Me             | Me               | E | 1.454                          | 1.233                          | 1.280                          | 1.233                          | 1.454                          | 119.8                                          | 119.8                                          | 167.3                                          | 167.3                                          | -176.8                                                         |
|                |                  | Z | 1.453                          | 1.233                          | 1.275                          | 1.233                          | 1.453                          | 120.0                                          | 120.0                                          | 175.4                                          | 175.4                                          | 0.0                                                            |
| Me             | NH <sub>2</sub>  | E | 1.453                          | 1.229                          | 1.272                          | 1.250                          | 1.349                          | 119.6                                          | 119.6                                          | 169.6                                          | 164.8                                          | -176.8                                                         |
|                |                  | Z | 1.452                          | 1.227                          | 1.273                          | 1.251                          | 1.348                          | 121.4                                          | 119.4                                          | 177.5                                          | 163.8                                          | 3.2                                                            |
| Me             | NMe <sub>2</sub> | E | 1.453                          | 1.232                          | 1.268                          | 1.259                          | 1.333                          | 120.5                                          | 120.1                                          | 170.3                                          | 165.6                                          | -176.8                                                         |
|                |                  | Z | 1.452                          | 1.230                          | 1.269                          | 1.261                          | 1.331                          | 120.9                                          | 120.4                                          | 177.7                                          | 163.4                                          | 2.9                                                            |
| Me             | OMe              | E | 1.452                          | 1.223                          | 1.276                          | 1.247                          | 1.377                          | 121.9                                          | 113.4                                          | 169.6                                          | 161.8                                          | 180.0                                                          |

|                        |                        |          |       |       |       |       |       |       |       |       |       |        |
|------------------------|------------------------|----------|-------|-------|-------|-------|-------|-------|-------|-------|-------|--------|
|                        |                        | <i>Z</i> | 1.452 | 1.222 | 1.274 | 1.247 | 1.377 | 122.0 | 113.4 | 178.2 | 162.9 | 0.0    |
| <b>Me</b>              | <b>SMe</b>             | <i>E</i> | 1.453 | 1.232 | 1.271 | 1.243 | 1.669 | 120.3 | 123.1 | 171.8 | 171.4 | 179.8  |
|                        |                        | <i>Z</i> | 1.452 | 1.232 | 1.270 | 1.242 | 1.669 | 120.4 | 123.7 | 176.3 | 174.7 | 0.0    |
| <b>Me</b>              | <b>CF<sub>3</sub></b>  | <i>E</i> | 1.452 | 1.228 | 1.279 | 1.238 | 1.433 | 120.9 | 119.0 | 166.8 | 165.0 | -180.0 |
|                        |                        | <i>Z</i> | 1.452 | 1.227 | 1.274 | 1.238 | 1.433 | 120.8 | 119.0 | 179.7 | 170.9 | 0.0    |
| <b>Me</b>              | <b>CHO</b>             | <i>E</i> | 1.452 | 1.230 | 1.281 | 1.232 | 1.406 | 120.5 | 125.1 | 165.3 | 165.6 | -177.7 |
|                        |                        | <i>Z</i> | 1.453 | 1.230 | 1.274 | 1.233 | 1.407 | 120.5 | 124.0 | 177.8 | 174.0 | -3.5   |
| <b>Me</b>              | <b>CN</b>              | <i>E</i> | 1.450 | 1.228 | 1.278 | 1.247 | 1.341 | 121.2 | 121.7 | 165.4 | 162.0 | 180.0  |
|                        |                        | <i>Z</i> | 1.451 | 1.227 | 1.272 | 1.248 | 1.341 | 121.2 | 121.4 | 177.6 | 166.4 | 0.0    |
| <b>Me</b>              | <b>NO<sub>2</sub></b>  | <i>E</i> | 1.451 | 1.220 | 1.281 | 1.239 | 1.477 | 122.6 | 113.3 | 168.0 | 162.9 | 180.0  |
|                        |                        | <i>Z</i> | 1.452 | 1.219 | 1.277 | 1.239 | 1.477 | 122.5 | 113.2 | 179.4 | 167.3 | 0.0    |
| <b>Me</b>              | <b>F</b>               | <i>E</i> | 1.450 | 1.212 | 1.284 | 1.238 | 1.424 | 124.9 | 110.2 | 169.4 | 157.8 | -180.0 |
|                        |                        | <i>Z</i> | 1.451 | 1.211 | 1.282 | 1.237 | 1.425 | 124.6 | 110.1 | 179.0 | 160.9 | 0.0    |
| <b>Me</b>              | <b>Cl</b>              | <i>E</i> | 1.452 | 1.220 | 1.278 | 1.234 | 1.772 | 122.6 | 114.0 | 172.7 | 168.9 | 180.0  |
|                        |                        | <i>Z</i> | 1.452 | 1.220 | 1.277 | 1.233 | 1.775 | 122.6 | 114.0 | 175.5 | 173.8 | 0.0    |
| <b>NH<sub>2</sub></b>  | <b>NH<sub>2</sub></b>  | <i>E</i> | 1.366 | 1.244 | 1.265 | 1.243 | 1.366 | 119.6 | 119.6 | 171.1 | 171.1 | 180.0  |
|                        |                        | <i>Z</i> | 1.366 | 1.243 | 1.264 | 1.243 | 1.366 | 119.8 | 119.8 | 174.7 | 174.7 | 6.8    |
| <b>NH<sub>2</sub></b>  | <b>NMe<sub>2</sub></b> | <i>E</i> | 1.373 | 1.244 | 1.264 | 1.250 | 1.349 | 119.3 | 120.9 | 170.7 | 169.9 | -179.9 |
|                        |                        | <i>Z</i> | 1.374 | 1.243 | 1.263 | 1.250 | 1.349 | 119.4 | 121.3 | 176.6 | 171.9 | 6.6    |
| <b>NH<sub>2</sub></b>  | <b>OMe</b>             | <i>E</i> | 1.356 | 1.240 | 1.264 | 1.244 | 1.384 | 120.6 | 113.4 | 171.4 | 169.2 | -176.8 |
|                        |                        | <i>Z</i> | 1.355 | 1.240 | 1.263 | 1.244 | 1.386 | 120.7 | 113.4 | 175.7 | 173.2 | 3.6    |
| <b>NH<sub>2</sub></b>  | <b>SMe</b>             | <i>E</i> | 1.354 | 1.248 | 1.265 | 1.238 | 1.673 | 119.6 | 123.7 | 170.2 | 172.7 | -176.7 |
|                        |                        | <i>Z</i> | 1.355 | 1.248 | 1.266 | 1.237 | 1.674 | 119.7 | 124.5 | 169.9 | 179.2 | 3.1    |
| <b>NH<sub>2</sub></b>  | <b>CF<sub>3</sub></b>  | <i>E</i> | 1.320 | 1.254 | 1.262 | 1.238 | 1.419 | 120.4 | 120.0 | 165.9 | 169.3 | 178.1  |
|                        |                        | <i>Z</i> | 1.318 | 1.254 | 1.258 | 1.239 | 1.419 | 120.4 | 120.2 | 171.9 | 177.7 | 1.9    |
| <b>NH<sub>2</sub></b>  | <b>CHO</b>             | <i>E</i> | 1.323 | 1.256 | 1.265 | 1.233 | 1.402 | 120.1 | 124.8 | 163.7 | 169.5 | -172.3 |
|                        |                        | <i>Z</i> | 1.321 | 1.256 | 1.260 | 1.239 | 1.407 | 119.9 | 121.2 | 169.2 | 178.1 | 8.9    |
| <b>NH<sub>2</sub></b>  | <b>CN</b>              | <i>E</i> | 1.308 | 1.260 | 1.256 | 1.247 | 1.334 | 120.5 | 122.7 | 165.5 | 168.5 | -180.0 |
|                        |                        | <i>Z</i> | 1.307 | 1.259 | 1.252 | 1.249 | 1.334 | 120.5 | 122.2 | 172.7 | 176.5 | 0.0    |
| <b>NH<sub>2</sub></b>  | <b>NO<sub>2</sub></b>  | <i>E</i> | 1.314 | 1.249 | 1.259 | 1.246 | 1.475 | 121.7 | 112.7 | 170.6 | 170.9 | -178.7 |
|                        |                        | <i>Z</i> | 1.311 | 1.250 | 1.256 | 1.246 | 1.481 | 121.2 | 112.5 | 174.1 | 177.7 | -1.4   |
| <b>NH<sub>2</sub></b>  | <b>F</b>               | <i>E</i> | 1.339 | 1.235 | 1.267 | 1.241 | 1.421 | 122.6 | 109.9 | 171.9 | 168.5 | -177.0 |
|                        |                        | <i>Z</i> | 1.338 | 1.235 | 1.266 | 1.240 | 1.425 | 122.6 | 109.7 | 174.8 | 173.5 | 3.3    |
| <b>NH<sub>2</sub></b>  | <b>Cl</b>              | <i>E</i> | 1.336 | 1.243 | 1.265 | 1.238 | 1.753 | 121.4 | 113.9 | 171.4 | 170.5 | -177.2 |
|                        |                        | <i>Z</i> | 1.335 | 1.243 | 1.265 | 1.237 | 1.756 | 121.5 | 113.9 | 172.4 | 176.2 | 3.1    |
| <b>NMe<sub>2</sub></b> | <b>NMe<sub>2</sub></b> | <i>E</i> | 1.357 | 1.250 | 1.263 | 1.250 | 1.357 | 120.8 | 120.8 | 169.5 | 169.5 | -172.6 |
|                        |                        | <i>Z</i> | 1.358 | 1.249 | 1.262 | 1.249 | 1.358 | 120.9 | 120.9 | 174.2 | 174.2 | 6.4    |
| <b>NMe<sub>2</sub></b> | <b>OMe</b>             | <i>E</i> | 1.339 | 1.248 | 1.263 | 1.245 | 1.391 | 121.6 | 113.2 | 170.7 | 169.3 | -176.6 |
|                        |                        | <i>Z</i> | 1.337 | 1.248 | 1.261 | 1.245 | 1.394 | 121.6 | 112.9 | 174.0 | 174.9 | 3.3    |
| <b>NMe<sub>2</sub></b> | <b>SMe</b>             | <i>E</i> | 1.333 | 1.258 | 1.262 | 1.240 | 1.693 | 120.5 | 120.3 | 168.4 | 171.3 | 176.9  |
|                        |                        | <i>Z</i> | 1.338 | 1.256 | 1.264 | 1.238 | 1.678 | 120.8 | 124.1 | 168.3 | 179.5 | 2.8    |
| <b>NMe<sub>2</sub></b> | <b>CF<sub>3</sub></b>  | <i>E</i> | 1.303 | 1.268 | 1.256 | 1.243 | 1.412 | 120.2 | 120.1 | 167.1 | 170.4 | -180.0 |
|                        |                        | <i>Z</i> | 1.303 | 1.268 | 1.252 | 1.244 | 1.411 | 120.0 | 119.6 | 173.8 | 177.7 | 0.0    |
| <b>NMe<sub>2</sub></b> | <b>CHO</b>             | <i>E</i> | 1.302 | 1.271 | 1.255 | 1.250 | 1.409 | 119.9 | 117.0 | 169.2 | 172.4 | -180.0 |
|                        |                        | <i>Z</i> | 1.299 | 1.275 | 1.246 | 1.256 | 1.406 | 118.6 | 116.1 | 178.6 | 179.4 | 0.0    |
| <b>NMe<sub>2</sub></b> | <b>CN</b>              | <i>E</i> | 1.297 | 1.272 | 1.250 | 1.252 | 1.332 | 120.1 | 122.5 | 166.8 | 169.6 | -180.0 |

|                  |                 |   |       |       |       |       |       |       |       |       |       |        |
|------------------|-----------------|---|-------|-------|-------|-------|-------|-------|-------|-------|-------|--------|
|                  |                 | Z | 1.297 | 1.273 | 1.247 | 1.254 | 1.332 | 120.0 | 121.3 | 173.4 | 176.9 | 0.0    |
| NMe <sub>2</sub> | NO <sub>2</sub> | E | 1.298 | 1.264 | 1.252 | 1.253 | 1.460 | 121.0 | 112.8 | 171.0 | 170.9 | -180.0 |
|                  |                 | Z | 1.297 | 1.266 | 1.248 | 1.255 | 1.457 | 119.8 | 112.0 | 177.1 | 178.3 | 0.0    |
| NMe <sub>2</sub> | F               | E | 1.322 | 1.245 | 1.264 | 1.243 | 1.427 | 122.8 | 109.6 | 171.7 | 169.1 | -177.0 |
|                  |                 | Z | 1.320 | 1.246 | 1.263 | 1.242 | 1.433 | 122.7 | 109.1 | 173.8 | 175.2 | 3.0    |
| NMe <sub>2</sub> | Cl              | E | 1.317 | 1.254 | 1.262 | 1.241 | 1.758 | 121.7 | 113.6 | 171.3 | 170.8 | -177.4 |
|                  |                 | Z | 1.316 | 1.255 | 1.261 | 1.241 | 1.762 | 121.4 | 113.1 | 172.3 | 177.0 | 2.4    |
| OMe              | OMe             | E | 1.375 | 1.242 | 1.264 | 1.242 | 1.375 | 114.1 | 114.1 | 169.3 | 169.3 | 180.0  |
|                  |                 | Z | 1.375 | 1.242 | 1.263 | 1.242 | 1.375 | 114.2 | 114.2 | 173.3 | 173.3 | 0.0    |
| OMe              | SMe             | E | 1.378 | 1.247 | 1.267 | 1.233 | 1.681 | 113.5 | 122.2 | 166.6 | 171.2 | 180.0  |
|                  |                 | Z | 1.381 | 1.246 | 1.266 | 1.233 | 1.668 | 113.2 | 124.8 | 169.5 | 179.4 | 0.0    |
| OMe              | CF <sub>3</sub> | E | 1.357 | 1.248 | 1.268 | 1.231 | 1.426 | 114.2 | 120.5 | 163.4 | 169.4 | 180.0  |
|                  |                 | Z | 1.357 | 1.248 | 1.265 | 1.231 | 1.427 | 114.2 | 120.8 | 167.0 | 179.6 | 0.0    |
| OMe              | CHO             | E | 1.362 | 1.249 | 1.272 | 1.224 | 1.405 | 113.9 | 127.0 | 160.7 | 169.5 | 180.0  |
|                  |                 | Z | 1.362 | 1.248 | 1.268 | 1.225 | 1.407 | 113.9 | 126.3 | 165.6 | 178.7 | 4.0    |
| OMe              | CN              | E | 1.350 | 1.251 | 1.263 | 1.240 | 1.335 | 122.8 | 122.8 | 162.8 | 168.2 | -180.0 |
|                  |                 | Z | 1.351 | 1.251 | 1.258 | 1.240 | 1.335 | 114.2 | 123.5 | 170.6 | 176.2 | 0.0    |
| OMe              | NO <sub>2</sub> | E | 1.342 | 1.248 | 1.267 | 1.235 | 1.469 | 119.5 | 114.1 | 166.1 | 169.5 | 180.0  |
|                  |                 | Z | 1.354 | 1.243 | 1.264 | 1.236 | 1.470 | 114.9 | 114.0 | 171.0 | 176.8 | 0.0    |
| OMe              | F               | E | 1.360 | 1.237 | 1.267 | 1.239 | 1.409 | 115.5 | 110.3 | 169.7 | 168.6 | -180.0 |
|                  |                 | Z | 1.360 | 1.237 | 1.266 | 1.239 | 1.410 | 115.6 | 110.3 | 172.7 | 173.0 | 0.0    |
| OMe              | Cl              | E | 1.363 | 1.242 | 1.267 | 1.234 | 1.741 | 114.7 | 114.6 | 168.9 | 170.3 | 180.0  |
|                  |                 | Z | 1.363 | 1.242 | 1.272 | 1.234 | 1.741 | 114.7 | 114.8 | 170.3 | 175.7 | 0.0    |
| SMe              | SMe             | E | 1.669 | 1.242 | 1.265 | 1.242 | 1.669 | 123.6 | 123.6 | 174.1 | 174.1 | 180.0  |
|                  |                 | Z | 1.686 | 1.242 | 1.265 | 1.241 | 1.667 | 120.1 | 123.6 | 177.1 | 175.0 | 0.0    |
| SMe              | CF <sub>3</sub> | E | 1.650 | 1.243 | 1.266 | 1.239 | 1.427 | 124.2 | 119.5 | 170.9 | 170.1 | 180.0  |
|                  |                 | Z | 1.651 | 1.242 | 1.264 | 1.240 | 1.425 | 124.1 | 119.1 | 179.1 | 174.1 | 0.0    |
| SMe              | CHO             | E | 1.650 | 1.245 | 1.265 | 1.245 | 1.426 | 124.0 | 116.3 | 173.5 | 173.4 | -180.0 |
|                  |                 | Z | 1.653 | 1.245 | 1.263 | 1.241 | 1.412 | 123.5 | 119.7 | 177.6 | 176.8 | 4.9    |
| SMe              | CN              | E | 1.643 | 1.246 | 1.261 | 1.249 | 1.337 | 124.5 | 122.3 | 170.2 | 168.6 | -179.9 |
|                  |                 | Z | 1.643 | 1.246 | 1.259 | 1.250 | 1.337 | 124.5 | 121.1 | 179.5 | 172.7 | 0.0    |
| SMe              | NO <sub>2</sub> | E | 1.649 | 1.236 | 1.267 | 1.241 | 1.470 | 125.4 | 113.6 | 172.6 | 170.2 | -180.0 |
|                  |                 | Z | 1.646 | 1.237 | 1.264 | 1.244 | 1.502 | 124.6 | 111.6 | 177.6 | 177.7 | 0.0    |
| SMe              | F               | E | 1.656 | 1.226 | 1.271 | 1.240 | 1.421 | 126.7 | 110.1 | 173.7 | 167.2 | 180.0  |
|                  |                 | Z | 1.657 | 1.226 | 1.271 | 1.239 | 1.426 | 126.6 | 109.6 | 179.4 | 169.0 | -0.1   |
| SMe              | Cl              | E | 1.671 | 1.232 | 1.270 | 1.237 | 1.761 | 123.3 | 114.1 | 172.8 | 170.4 | -180.0 |
|                  |                 | Z | 1.657 | 1.233 | 1.269 | 1.236 | 1.741 | 125.0 | 113.5 | 174.0 | 179.8 | 0.0    |
| CF <sub>3</sub>  | CF <sub>3</sub> | E | 1.441 | 1.231 | 1.279 | 1.231 | 1.441 | 119.3 | 119.3 | 165.5 | 165.5 | 180.0  |
|                  |                 | Z | 1.442 | 1.231 | 1.272 | 1.231 | 1.442 | 119.4 | 119.5 | 175.5 | 175.5 | 0.1    |
| CF <sub>3</sub>  | CHO             | E | 1.439 | 1.234 | 1.282 | 1.226 | 1.415 | 119.1 | 125.3 | 163.5 | 165.8 | 178.4  |
|                  |                 | Z | 1.440 | 1.234 | 1.273 | 1.226 | 1.416 | 119.2 | 124.8 | 172.8 | 178.4 | -2.5   |
| CF <sub>3</sub>  | CN              | E | 1.442 | 1.231 | 1.277 | 1.241 | 1.339 | 119.5 | 122.6 | 164.8 | 163.1 | 180.0  |
|                  |                 | Z | 1.443 | 1.231 | 1.269 | 1.241 | 1.340 | 119.7 | 122.6 | 177.9 | 171.5 | 0.0    |
| CF <sub>3</sub>  | NO <sub>2</sub> | E | 1.441 | 1.225 | 1.278 | 1.234 | 1.485 | 120.4 | 113.5 | 168.1 | 165.5 | 180.0  |
|                  |                 | Z | 1.442 | 1.226 | 1.273 | 1.234 | 1.488 | 120.4 | 113.5 | 176.3 | 173.8 | 0.0    |
| CF <sub>3</sub>  | F               | E | 1.436 | 1.220 | 1.275 | 1.239 | 1.400 | 121.7 | 110.7 | 169.7 | 161.3 | -180.0 |

|                 |                 |   |       |       |       |       |       |       |       |       |       |        |
|-----------------|-----------------|---|-------|-------|-------|-------|-------|-------|-------|-------|-------|--------|
|                 |                 | Z | 1.437 | 1.221 | 1.272 | 1.238 | 1.402 | 121.8 | 110.7 | 177.8 | 167.3 | 0.0    |
| CF <sub>3</sub> | Cl              | E | 1.437 | 1.227 | 1.274 | 1.234 | 1.740 | 120.4 | 114.9 | 170.6 | 167.4 | 180.0  |
|                 |                 | Z | 1.437 | 1.227 | 1.272 | 1.234 | 1.741 | 120.5 | 115.0 | 174.6 | 174.1 | 0.0    |
| CHO             | CHO             | E | 1.412 | 1.228 | 1.285 | 1.228 | 1.412 | 125.1 | 125.1 | 163.9 | 163.9 | 180.0  |
|                 |                 | Z | 1.414 | 1.229 | 1.274 | 1.229 | 1.414 | 124.3 | 124.3 | 176.3 | 176.3 | 5.7    |
| CHO             | CN              | E | 1.416 | 1.225 | 1.281 | 1.243 | 1.340 | 125.3 | 122.2 | 164.6 | 160.5 | 178.3  |
|                 |                 | Z | 1.418 | 1.226 | 1.272 | 1.244 | 1.340 | 124.8 | 122.1 | 178.0 | 167.7 | -3.0   |
| CHO             | NO <sub>2</sub> | E | 1.418 | 1.218 | 1.282 | 1.236 | 1.482 | 126.7 | 113.4 | 167.7 | 161.9 | 178.6  |
|                 |                 | Z | 1.419 | 1.220 | 1.276 | 1.236 | 1.486 | 126.2 | 113.4 | 179.1 | 170.3 | -2.3   |
| CHO             | F               | E | 1.415 | 1.212 | 1.282 | 1.240 | 1.407 | 129.0 | 110.5 | 169.5 | 157.1 | 178.7  |
|                 |                 | Z | 1.417 | 1.213 | 1.277 | 1.239 | 1.409 | 128.5 | 110.5 | 178.8 | 162.2 | -2.3   |
| CHO             | Cl              | E | 1.414 | 1.220 | 1.276 | 1.235 | 1.751 | 126.9 | 114.6 | 171.6 | 166.4 | 178.2  |
|                 |                 | Z | 1.414 | 1.221 | 1.274 | 1.234 | 1.753 | 126.7 | 114.7 | 176.1 | 173.5 | -2.6   |
| CN              | CN              | E | 1.338 | 1.241 | 1.273 | 1.241 | 1.338 | 122.8 | 122.8 | 163.1 | 163.1 | 180.0  |
|                 |                 | Z | 1.337 | 1.241 | 1.264 | 1.242 | 1.338 | 122.9 | 122.8 | 174.3 | 174.2 | 0.0    |
| CN              | NO <sub>2</sub> | E | 1.337 | 1.234 | 1.274 | 1.235 | 1.485 | 124.1 | 113.5 | 166.3 | 165.1 | -180.0 |
|                 |                 | Z | 1.337 | 1.235 | 1.269 | 1.235 | 1.487 | 124.0 | 113.6 | 173.2 | 176.1 | 0.0    |
| CN              | F               | E | 1.334 | 1.228 | 1.271 | 1.242 | 1.393 | 125.8 | 110.8 | 168.3 | 160.9 | -180.0 |
|                 |                 | Z | 1.335 | 1.229 | 1.266 | 1.241 | 1.395 | 125.7 | 110.7 | 175.7 | 169.8 | 0.0    |
| CN              | Cl              | E | 1.337 | 1.236 | 1.270 | 1.237 | 1.730 | 124.0 | 115.1 | 168.6 | 166.2 | -180.0 |
|                 |                 | Z | 1.337 | 1.236 | 1.267 | 1.236 | 1.732 | 123.9 | 115.3 | 172.6 | 175.4 | 0.0    |
| NO <sub>2</sub> | NO <sub>2</sub> | E | 1.488 | 1.230 | 1.275 | 1.230 | 1.488 | 113.9 | 113.9 | 169.2 | 169.2 | 180.0  |
|                 |                 | Z | 1.490 | 1.230 | 1.273 | 1.230 | 1.490 | 114.0 | 114.0 | 174.9 | 174.9 | 0.0    |
| NO <sub>2</sub> | F               | E | 1.484 | 1.227 | 1.272 | 1.238 | 1.392 | 114.5 | 111.0 | 171.0 | 165.9 | -180.0 |
|                 |                 | Z | 1.485 | 1.227 | 1.271 | 1.237 | 1.394 | 114.5 | 111.0 | 176.8 | 169.8 | 0.0    |
| NO <sub>2</sub> | Cl              | E | 1.483 | 1.232 | 1.273 | 1.231 | 1.728 | 114.0 | 115.6 | 170.7 | 169.2 | 180.0  |
|                 |                 | Z | 1.484 | 1.232 | 1.272 | 1.231 | 1.729 | 114.0 | 115.7 | 174.2 | 174.2 | 0.0    |
| F               | F               | E | 1.390 | 1.237 | 1.268 | 1.237 | 1.390 | 111.2 | 111.2 | 168.6 | 168.6 | 180.0  |
|                 |                 | Z | 1.391 | 1.236 | 1.267 | 1.236 | 1.391 | 111.1 | 111.2 | 172.3 | 172.3 | 0.0    |
| F               | Cl              | E | 1.400 | 1.238 | 1.271 | 1.228 | 1.721 | 110.8 | 116.1 | 167.4 | 170.4 | -180.0 |
|                 |                 | Z | 1.401 | 1.238 | 1.271 | 1.228 | 1.721 | 110.8 | 116.3 | 170.0 | 175.0 | 0.0    |
| Cl              | Cl              | E | 1.735 | 1.232 | 1.272 | 1.232 | 1.735 | 115.3 | 115.3 | 170.9 | 170.9 | -180.0 |
|                 |                 | Z | 1.735 | 1.231 | 1.272 | 1.231 | 1.736 | 115.4 | 115.4 | 173.4 | 173.4 | 0.0    |

### 3. NBO charges of the 1,4-diazabutatrienes

**Table S4.** NBO charges at the N<sup>1</sup>, C<sup>2</sup>, C<sup>3</sup>, N<sup>4</sup> atoms of the 1,4-diazabutatrienes **1**, sum of those charges ( $\Sigma q$ ) and charge difference.

| R <sup>1</sup> | R <sup>2</sup>  |   | N <sup>1</sup> | C <sup>2</sup> | C <sup>3</sup> | N <sup>4</sup> | $\Sigma q$ | $\Sigma q (E) - \Sigma q (Z)$ |
|----------------|-----------------|---|----------------|----------------|----------------|----------------|------------|-------------------------------|
| H              | H               | E | -0.5356        | 0.1766         | 0.1765         | -0.5356        | -0.7182    | -0.0069                       |
|                |                 | Z | -0.5309        | 0.1753         | 0.1753         | -0.5309        | -0.7113    |                               |
| H              | Me              | E | -0.5517        | 0.1955         | 0.1467         | -0.3288        | -0.5384    | -0.0032                       |
|                |                 | Z | -0.5493        | 0.1792         | 0.1602         | -0.3254        | -0.5353    |                               |
| H              | NH <sub>2</sub> | E | -0.6047        | 0.2700         | -0.0210        | -0.1618        | -0.5175    | -0.0027                       |
|                |                 | Z | -0.6038        | 0.2655         | -0.0183        | -0.1582        | -0.5148    |                               |

|                 |                  |   |         |        |         |         |         |         |
|-----------------|------------------|---|---------|--------|---------|---------|---------|---------|
| H               | NMe <sub>2</sub> | E | -0.6357 | 0.2822 | -0.0629 | -0.1580 | -0.5744 | -0.0032 |
|                 |                  | Z | -0.6349 | 0.2828 | -0.0628 | -0.1563 | -0.5712 |         |
| H               | OMe              | E | -0.5736 | 0.2902 | 0.0326  | -0.0786 | -0.3295 | -0.0023 |
|                 |                  | Z | -0.5788 | 0.2986 | 0.0269  | -0.0739 | -0.3272 |         |
| H               | SMe              | E | -0.5762 | 0.2255 | 0.0759  | -0.5013 | -0.7761 | -0.0093 |
|                 |                  | Z | -0.5717 | 0.2154 | 0.0891  | -0.4997 | -0.7669 |         |
| H               | CF <sub>3</sub>  | E | -0.5045 | 0.2132 | 0.2062  | -0.4133 | -0.4983 | -0.0045 |
|                 |                  | Z | -0.5026 | 0.2065 | 0.2114  | -0.4091 | -0.4938 |         |
| H               | CHO              | E | -0.5056 | 0.1991 | 0.1988  | -0.4165 | -0.5243 | -0.0190 |
|                 |                  | Z | -0.5117 | 0.1871 | 0.2151  | -0.3958 | -0.5053 |         |
| H               | CN               | E | -0.4944 | 0.2116 | 0.2348  | -0.4032 | -0.4512 | -0.0042 |
|                 |                  | Z | -0.4913 | 0.2054 | 0.2373  | -0.3984 | -0.4470 |         |
| H               | NO <sub>2</sub>  | E | -0.5064 | 0.2707 | 0.1280  | -0.2289 | -0.3366 | -0.0028 |
|                 |                  | Z | -0.5045 | 0.2600 | 0.1345  | -0.2238 | -0.3337 |         |
| H               | F                | E | -0.5360 | 0.3359 | 0.0181  | 0.0434  | -0.1386 | -0.0071 |
|                 |                  | Z | -0.5343 | 0.3273 | 0.0236  | 0.0520  | -0.1315 |         |
| H               | Cl               | E | -0.5274 | 0.2766 | 0.0979  | -0.2997 | -0.4527 | -0.0105 |
|                 |                  | Z | -0.5267 | 0.2746 | 0.1022  | -0.2922 | -0.4421 |         |
| Me              | Me               | E | -0.3472 | 0.1705 | 0.1705  | -0.3472 | -0.3534 | -0.0022 |
|                 |                  | Z | -0.3417 | 0.1596 | 0.1781  | -0.3471 | -0.3512 |         |
| Me              | NH <sub>2</sub>  | E | -0.3863 | 0.2366 | 0.0196  | -0.1798 | -0.3099 | 0.0012  |
|                 |                  | Z | -0.3923 | 0.2724 | -0.0158 | -0.1754 | -0.3111 |         |
| Me              | NMe <sub>2</sub> | E | -0.4128 | 0.2521 | -0.0229 | -0.1726 | -0.3561 | -0.0009 |
|                 |                  | Z | -0.4131 | 0.2742 | -0.0430 | -0.1734 | -0.3553 |         |
| Me              | OMe              | E | -0.3648 | 0.2742 | 0.0500  | -0.0923 | -0.1328 | 0.0015  |
|                 |                  | Z | -0.3665 | 0.2894 | 0.0351  | -0.0924 | -0.1344 |         |
| Me              | SMe              | E | -0.3571 | 0.2052 | 0.1218  | -0.5172 | -0.5473 | 0.0183  |
|                 |                  | Z | -0.3646 | 0.2114 | 0.0978  | -0.5102 | -0.5656 |         |
| Me              | CF <sub>3</sub>  | E | -0.3019 | 0.1903 | 0.2211  | -0.4299 | -0.3203 | -0.0018 |
|                 |                  | Z | -0.3018 | 0.1994 | 0.2128  | -0.4289 | -0.3185 |         |
| Me              | CHO              | E | -0.3118 | 0.1742 | 0.2208  | -0.4101 | -0.3269 | 0.0004  |
|                 |                  | Z | -0.3102 | 0.1823 | 0.2151  | -0.4144 | -0.3273 |         |
| Me              | CN               | E | -0.2910 | 0.1877 | 0.2509  | -0.4197 | -0.2722 | -0.0003 |
|                 |                  | Z | -0.2901 | 0.2008 | 0.2357  | -0.4184 | -0.2719 |         |
| Me              | NO <sub>2</sub>  | E | -0.3033 | 0.2508 | 0.1415  | -0.2434 | -0.1543 | -0.0017 |
|                 |                  | Z | -0.3038 | 0.2598 | 0.1323  | -0.2409 | -0.1526 |         |
| Me              | F                | E | -0.3255 | 0.3149 | 0.0326  | 0.0285  | 0.0506  | 0.0006  |
|                 |                  | Z | -0.3269 | 0.3222 | 0.0228  | 0.0318  | 0.0499  |         |
| Me              | Cl               | E | -0.3174 | 0.2556 | 0.1117  | -0.3080 | -0.2581 | -0.0045 |
|                 |                  | Z | -0.3186 | 0.2583 | 0.1114  | -0.3047 | -0.2536 |         |
| NH <sub>2</sub> | NH <sub>2</sub>  | E | -0.2148 | 0.1031 | 0.1031  | -0.2148 | -0.2234 | -0.0020 |
|                 |                  | Z | -0.2146 | 0.1040 | 0.1039  | -0.2146 | -0.2214 |         |
| NH <sub>2</sub> | NMe <sub>2</sub> | E | -0.2363 | 0.1231 | 0.0732  | -0.2108 | -0.2508 | -0.0044 |
|                 |                  | Z | -0.2366 | 0.1321 | 0.0693  | -0.2112 | -0.2463 |         |
| NH <sub>2</sub> | OMe              | E | -0.1979 | 0.1340 | 0.1282  | -0.1326 | -0.0684 | -0.0001 |
|                 |                  | Z | -0.1991 | 0.1389 | 0.1250  | -0.1332 | -0.0684 |         |

|                  |                  |   |         |         |        |         |         |         |
|------------------|------------------|---|---------|---------|--------|---------|---------|---------|
| NH <sub>2</sub>  | SMe              | E | -0.1865 | 0.0576  | 0.1991 | -0.5566 | -0.4865 | 0.0089  |
|                  |                  | Z | -0.1948 | 0.0612  | 0.1847 | -0.5465 | -0.4954 |         |
| NH <sub>2</sub>  | CF <sub>3</sub>  | E | -0.1305 | 0.0072  | 0.2979 | -0.4909 | -0.3163 | 0.0002  |
|                  |                  | Z | -0.1318 | 0.0114  | 0.2959 | -0.4919 | -0.3165 |         |
| NH <sub>2</sub>  | CHO              | E | -0.1378 | -0.0069 | 0.3046 | -0.4773 | -0.3174 | 0.0055  |
|                  |                  | Z | -0.1353 | -0.0043 | 0.3136 | -0.4969 | -0.3229 |         |
| NH <sub>2</sub>  | CN               | E | -0.1167 | -0.0094 | 0.3285 | -0.4798 | -0.2775 | 0.0015  |
|                  |                  | Z | -0.1121 | -0.0196 | 0.3373 | -0.4846 | -0.2790 |         |
| NH <sub>2</sub>  | NO <sub>2</sub>  | E | -0.1237 | 0.0668  | 0.2468 | -0.3294 | -0.1395 | 0.0018  |
|                  |                  | Z | -0.1243 | 0.0699  | 0.2497 | -0.3367 | -0.1414 |         |
| NH <sub>2</sub>  | F                | E | -0.1640 | 0.1557  | 0.1119 | -0.0150 | 0.0886  | -0.0010 |
|                  |                  | Z | -0.1652 | 0.1577  | 0.1103 | -0.0132 | 0.0896  |         |
| NH <sub>2</sub>  | Cl               | E | -0.1547 | 0.0932  | 0.1863 | -0.3692 | -0.2443 | -0.0034 |
|                  |                  | Z | -0.1559 | 0.0930  | 0.1884 | -0.3663 | -0.2408 |         |
| NMe <sub>2</sub> | NMe <sub>2</sub> | E | -0.2299 | 0.0960  | 0.0960 | -0.2299 | -0.2677 | -0.0099 |
|                  |                  | Z | -0.2312 | 0.1023  | 0.1022 | -0.2311 | -0.2578 |         |
| NMe <sub>2</sub> | OMe              | E | -0.1908 | 0.0917  | 0.1523 | -0.1579 | -0.1047 | 0.0001  |
|                  |                  | Z | -0.1919 | 0.0922  | 0.1530 | -0.1580 | -0.1048 |         |
| NMe <sub>2</sub> | SMe              | E | -0.1814 | 0.0246  | 0.2075 | -0.5745 | -0.5238 | 0.0006  |
|                  |                  | Z | -0.1861 | 0.0181  | 0.2066 | -0.5631 | -0.5245 |         |
| NMe <sub>2</sub> | CF <sub>3</sub>  | E | -0.1245 | -0.0512 | 0.3132 | -0.5262 | -0.3887 | -0.0015 |
|                  |                  | Z | -0.1308 | -0.0325 | 0.2995 | -0.5235 | -0.3872 |         |
| NMe <sub>2</sub> | CHO              | E | -0.1237 | -0.0662 | 0.3092 | -0.5200 | -0.4007 | 0.0058  |
|                  |                  | Z | -0.1251 | -0.0509 | 0.3315 | -0.5620 | -0.4065 |         |
| NMe <sub>2</sub> | CN               | E | -0.1156 | -0.0591 | 0.3395 | -0.5107 | -0.3459 | 0.0016  |
|                  |                  | Z | -0.1175 | -0.0540 | 0.3349 | -0.5109 | -0.3474 |         |
| NMe <sub>2</sub> | NO <sub>2</sub>  | E | -0.1177 | 0.0040  | 0.2745 | -0.3681 | -0.2073 | 0.0007  |
|                  |                  | Z | -0.1213 | 0.0081  | 0.2724 | -0.3673 | -0.2081 |         |
| NMe <sub>2</sub> | F                | E | -0.1622 | 0.1100  | 0.1305 | -0.0427 | 0.0356  | -0.0019 |
|                  |                  | Z | -0.1634 | 0.1107  | 0.1309 | -0.0406 | 0.0376  |         |
| NMe <sub>2</sub> | Cl               | E | -0.1519 | 0.0466  | 0.2025 | -0.3962 | -0.2990 | -0.0048 |
|                  |                  | Z | -0.1534 | 0.0457  | 0.2058 | -0.3923 | -0.2942 |         |
| OMe              | OMe              | E | -0.1179 | 0.1633  | 0.1633 | -0.1179 | 0.0908  | 0.0002  |
|                  |                  | Z | -0.1203 | 0.1656  | 0.1656 | -0.1203 | 0.0906  |         |
| OMe              | SMe              | E | -0.1072 | 0.0984  | 0.2210 | -0.5388 | -0.3266 | 0.0180  |
|                  |                  | Z | -0.1091 | 0.0830  | 0.2146 | -0.5331 | -0.3446 |         |
| OMe              | CF <sub>3</sub>  | E | -0.0530 | 0.0721  | 0.3149 | -0.4552 | -0.1213 | 0.0027  |
|                  |                  | Z | -0.0485 | 0.0531  | 0.3319 | -0.4604 | -0.1240 |         |
| OMe              | CHO              | E | -0.0635 | 0.0573  | 0.3165 | -0.4347 | -0.1245 | 0.0041  |
|                  |                  | Z | -0.0578 | 0.0388  | 0.3324 | -0.4420 | -0.1286 |         |
| OMe              | CN               | E | -0.0411 | 0.0652  | 0.3434 | -0.4415 | -0.0740 | 0.0028  |
|                  |                  | Z | -0.0346 | 0.0495  | 0.3547 | -0.4463 | -0.0768 |         |
| OMe              | NO <sub>2</sub>  | E | -0.0011 | 0.0410  | 0.2578 | -0.2831 | 0.0145  | -0.0207 |
|                  |                  | Z | -0.0527 | 0.1111  | 0.2519 | -0.2751 | 0.0352  |         |
| OMe              | F                | E | -0.0816 | 0.1835  | 0.1462 | 0.0035  | 0.2515  | 0.0006  |
|                  |                  | Z | -0.0835 | 0.1836  | 0.1480 | 0.0029  | 0.2509  |         |



|                 |                 |   |         |        |        |         |         |         |
|-----------------|-----------------|---|---------|--------|--------|---------|---------|---------|
| OMe             | Cl              | E | -0.0732 | 0.1275 | 0.2202 | -0.3566 | -0.0822 | 0.0005  |
|                 |                 | Z | -0.0756 | 0.1258 | 0.2253 | -0.3582 | -0.0827 |         |
| SMe             | SMe             | E | -0.5321 | 0.1379 | 0.1379 | -0.5321 | -0.7884 | -0.0282 |
|                 |                 | Z | -0.5249 | 0.1443 | 0.1554 | -0.5350 | -0.7602 |         |
| SMe             | CF <sub>3</sub> | E | -0.4884 | 0.1082 | 0.2546 | -0.4596 | -0.5852 | -0.0040 |
|                 |                 | Z | -0.4888 | 0.1161 | 0.2502 | -0.4587 | -0.5812 |         |
| SMe             | CHO             | E | -0.4892 | 0.0899 | 0.2495 | -0.4594 | -0.6092 | -0.0170 |
|                 |                 | Z | -0.4899 | 0.0990 | 0.2677 | -0.4690 | -0.5922 |         |
| SMe             | CN              | E | -0.4863 | 0.0992 | 0.2832 | -0.4493 | -0.5533 | -0.0018 |
|                 |                 | Z | -0.4870 | 0.1079 | 0.2754 | -0.4478 | -0.5515 |         |
| SMe             | NO <sub>2</sub> | E | -0.4926 | 0.1647 | 0.1787 | -0.2712 | -0.4204 | -0.0026 |
|                 |                 | Z | -0.4836 | 0.1591 | 0.2146 | -0.3078 | -0.4178 |         |
| SMe             | F               | E | -0.5085 | 0.2345 | 0.0730 | 0.0077  | -0.1933 | -0.0044 |
|                 |                 | Z | -0.5096 | 0.2418 | 0.0668 | 0.0121  | -0.1889 |         |
| SMe             | Cl              | E | -0.5095 | 0.2021 | 0.1533 | -0.3351 | -0.4893 | 0.0158  |
|                 |                 | Z | -0.5011 | 0.1814 | 0.1484 | -0.3338 | -0.5051 |         |
| CF <sub>3</sub> | CF <sub>3</sub> | E | -0.3897 | 0.2445 | 0.2445 | -0.3897 | -0.2904 | -0.0008 |
|                 |                 | Z | -0.3902 | 0.2455 | 0.2452 | -0.3901 | -0.2896 |         |
| CF <sub>3</sub> | CHO             | E | -0.3951 | 0.2191 | 0.2476 | -0.3728 | -0.3012 | 0.0003  |
|                 |                 | Z | -0.3937 | 0.2164 | 0.2497 | -0.3739 | -0.3015 |         |
| CF <sub>3</sub> | CN              | E | -0.3762 | 0.2334 | 0.2763 | -0.3807 | -0.2473 | 0.0002  |
|                 |                 | Z | -0.3746 | 0.2328 | 0.2747 | -0.3803 | -0.2475 |         |
| CF <sub>3</sub> | NO <sub>2</sub> | E | -0.3876 | 0.2888 | 0.1700 | -0.2123 | -0.1411 | 0.0013  |
|                 |                 | Z | -0.3873 | 0.2859 | 0.1716 | -0.2125 | -0.1423 |         |
| CF <sub>3</sub> | F               | E | -0.4153 | 0.3514 | 0.0642 | 0.0667  | 0.0670  | 0.0002  |
|                 |                 | Z | -0.4158 | 0.3510 | 0.0649 | 0.0667  | 0.0668  |         |
| CF <sub>3</sub> | Cl              | E | -0.4093 | 0.2960 | 0.1411 | -0.2947 | -0.2669 | -0.0012 |
|                 |                 | Z | -0.4102 | 0.2951 | 0.1445 | -0.2951 | -0.2657 |         |
| CHO             | CHO             | E | -0.3820 | 0.2279 | 0.2279 | -0.3820 | -0.3081 | 0.0025  |
|                 |                 | Z | -0.3782 | 0.2179 | 0.2326 | -0.3828 | -0.3106 |         |
| CHO             | CN              | E | -0.3650 | 0.2468 | 0.2464 | -0.3866 | -0.2584 | 0.0020  |
|                 |                 | Z | -0.3660 | 0.2512 | 0.2396 | -0.3852 | -0.2604 |         |
| CHO             | NO <sub>2</sub> | E | -0.3755 | 0.3036 | 0.1394 | -0.2157 | -0.1482 | 0.0013  |
|                 |                 | Z | -0.3765 | 0.3031 | 0.1387 | -0.2149 | -0.1496 |         |
| CHO             | F               | E | -0.3977 | 0.3615 | 0.0328 | 0.0601  | 0.0567  | 0.0011  |
|                 |                 | Z | -0.3994 | 0.3633 | 0.0294 | 0.0622  | 0.0556  |         |
| CHO             | Cl              | E | -0.3906 | 0.2968 | 0.1245 | -0.2965 | -0.2657 | -0.0019 |
|                 |                 | Z | -0.3925 | 0.3037 | 0.1143 | -0.2893 | -0.2638 |         |
| CN              | CN              | E | -0.3726 | 0.2694 | 0.2694 | -0.3726 | -0.2064 | 0.0011  |
|                 |                 | Z | -0.3716 | 0.2679 | 0.2679 | -0.3717 | -0.2075 |         |
| CN              | NO <sub>2</sub> | E | -0.3813 | 0.3292 | 0.1548 | -0.2006 | -0.0980 | 0.0023  |
|                 |                 | Z | -0.3813 | 0.3250 | 0.1562 | -0.2002 | -0.1003 |         |
| CN              | F               | E | -0.4008 | 0.3788 | 0.0618 | 0.0775  | 0.1175  | 0.0004  |
|                 |                 | Z | -0.4014 | 0.3821 | 0.0516 | 0.0847  | 0.1170  |         |
| CN              | Cl              | E | -0.3984 | 0.3229 | 0.1377 | -0.2919 | -0.2297 | -0.0011 |
|                 |                 | Z | -0.3990 | 0.3262 | 0.1294 | -0.2853 | -0.2286 |         |

|                 |                 |   |         |        |        |         |         |         |
|-----------------|-----------------|---|---------|--------|--------|---------|---------|---------|
| NO <sub>2</sub> | NO <sub>2</sub> | E | -0.2203 | 0.2175 | 0.2175 | -0.2203 | -0.0055 | 0.0021  |
|                 |                 | Z | -0.2216 | 0.2178 | 0.2177 | -0.2216 | -0.0076 |         |
| NO <sub>2</sub> | F               | E | -0.2438 | 0.2754 | 0.1072 | 0.0668  | 0.2057  | 0.0012  |
|                 |                 | Z | -0.2450 | 0.2770 | 0.1055 | 0.0670  | 0.2045  |         |
| NO <sub>2</sub> | Cl              | E | -0.2344 | 0.2213 | 0.1838 | -0.3024 | -0.1317 | -0.0001 |
|                 |                 | Z | -0.2351 | 0.2214 | 0.1847 | -0.3025 | -0.1316 |         |
| F               | F               | E | 0.0396  | 0.1725 | 0.1725 | 0.0396  | 0.4241  | 0.0002  |
|                 |                 | Z | 0.0389  | 0.1731 | 0.1730 | 0.0389  | 0.4239  |         |
| F               | Cl              | E | 0.0462  | 0.1147 | 0.2500 | -0.3342 | 0.0767  | 0.0004  |
|                 |                 | Z | 0.0457  | 0.1136 | 0.2526 | -0.3355 | 0.0764  |         |
| Cl              | Cl              | E | -0.3176 | 0.1934 | 0.1934 | -0.3176 | -0.2484 | 0.0005  |
|                 |                 | Z | -0.3186 | 0.1942 | 0.1943 | -0.3188 | -0.2489 |         |

### 3.1. Statistical Analysis involving NBO charges.

**Table S5.** Group electronegativities ( $\chi$ )<sup>11</sup> and substituent constants: Hammett constant ( $\sigma_p$ ) and inductive ( $\sigma_I$ ) and resonance ( $\sigma_R$ ) contributions.<sup>12</sup>

| Substituent      | $\chi$ | $\sigma_p$ | $\sigma_I$ | $\sigma_R$ |
|------------------|--------|------------|------------|------------|
| H                | 2.2    | 0          | 0          | 0          |
| Me               | 2.56   | -0.17      | 0.01       | -0.18      |
| NH <sub>2</sub>  | 3.1    | -0.66      | 0.08       | -0.74      |
| NMe <sub>2</sub> | 3.13   | -0.83      | 0.15       | -0.98      |
| OMe              | 3.53   | -0.27      | 0.29       | -0.56      |
| SMe              | 2.65   | 0          | 0.23       | -0.23      |
| CF <sub>3</sub>  | 2.68   | 0.54       | 0.38       | 0.04       |
| CHO              | 2.6    | 0.42       | 0.33       | 0.09       |
| CN               | 2.69   | 0.66       | 0.51       | 0.15       |
| NO <sub>2</sub>  | 3.22   | 0.78       | 0.65       | 0.13       |
| F                | 4      | 0.06       | 0.45       | -0.39      |
| Cl               | 3.05   | 0.23       | 0.42       | -0.19      |

**Table S6.** Linear correlations between NBO charge at N<sup>1</sup> atom of 1,4-diazabutatrienes **1** and the group electronegativity ( $\chi$ ) of R<sup>1</sup>

$$qN^1 (a.u.) = A + B * \chi (R^1)$$

| R <sup>2</sup>  |   | A      | B     | r <sup>2</sup> | Std Err | Points |
|-----------------|---|--------|-------|----------------|---------|--------|
| H               | E | -1.296 | 0.341 | 0.882          | 0.061   | 12     |
|                 | Z | -1.289 | 0.341 | 0.883          | 0.060   | 12     |
| Me              | E | -1.306 | 0.340 | 0.884          | 0.060   | 12     |
|                 | Z | -1.303 | 0.340 | 0.886          | 0.059   | 12     |
| NH <sub>2</sub> | E | -1.371 | 0.344 | 0.859          | 0.068   | 12     |

|                        |   |        |       |       |       |    |
|------------------------|---|--------|-------|-------|-------|----|
|                        | Z | -1.381 | 0.347 | 0.866 | 0.067 | 12 |
| <b>NMe<sub>2</sub></b> | E | -1.409 | 0.347 | 0.852 | 0.071 | 12 |
|                        | Z | -1.425 | 0.352 | 0.856 | 0.070 | 12 |
| <b>OMe</b>             | E | -1.318 | 0.335 | 0.864 | 0.065 | 12 |
|                        | Z | -1.328 | 0.338 | 0.871 | 0.063 | 12 |
| <b>SMe</b>             | E | -1.346 | 0.346 | 0.868 | 0.066 | 12 |
|                        | Z | -1.341 | 0.343 | 0.869 | 0.065 | 12 |
| <b>CF<sub>3</sub></b>  | E | -1.259 | 0.337 | 0.854 | 0.068 | 12 |
|                        | Z | -1.260 | 0.337 | 0.857 | 0.067 | 12 |
| <b>CHO</b>             | E | -1.260 | 0.335 | 0.858 | 0.066 | 12 |
|                        | Z | -1.268 | 0.339 | 0.862 | 0.066 | 12 |
| <b>CN</b>              | E | -1.255 | 0.338 | 0.846 | 0.070 | 12 |
|                        | Z | -1.263 | 0.342 | 0.850 | 0.070 | 12 |
| <b>NO<sub>2</sub></b>  | E | -1.293 | 0.349 | 0.842 | 0.074 | 12 |
|                        | Z | -1.258 | 0.336 | 0.849 | 0.069 | 12 |
| <b>F</b>               | E | -1.277 | 0.333 | 0.858 | 0.066 | 12 |
|                        | Z | -1.276 | 0.332 | 0.857 | 0.066 | 12 |
| <b>Cl</b>              | E | -1.276 | 0.335 | 0.854 | 0.067 | 12 |
|                        | Z | -1.271 | 0.334 | 0.860 | 0.066 | 12 |

**Table S7.** Linear correlations between NBO charge at N<sup>1</sup> atom of 1,4-diazabutatrienes **1** and the Hammett constant ( $\sigma_p$ ) of R<sup>2</sup>

$$qN^1 (a.u.) = A + B * \sigma_p (R^2)$$

| R <sup>1</sup>         |   | A      | B     | r <sup>2</sup> | Std Err | Points |
|------------------------|---|--------|-------|----------------|---------|--------|
| <b>H</b>               | E | -0.551 | 0.084 | 0.900          | 0.014   | 12     |
|                        | Z | -0.550 | 0.085 | 0.904          | 0.014   | 12     |
| <b>Me</b>              | E | -0.342 | 0.071 | 0.918          | 0.011   | 12     |
|                        | Z | -0.343 | 0.073 | 0.892          | 0.013   | 12     |
| <b>NH<sub>2</sub></b>  | E | -0.172 | 0.073 | 0.959          | 0.008   | 12     |
|                        | Z | -0.172 | 0.074 | 0.922          | 0.011   | 12     |
| <b>NMe<sub>2</sub></b> | E | -0.166 | 0.073 | 0.957          | 0.008   | 12     |
|                        | Z | -0.168 | 0.071 | 0.939          | 0.009   | 12     |
| <b>OMe</b>             | E | -0.089 | 0.082 | 0.918          | 0.012   | 12     |
|                        | Z | -0.091 | 0.071 | 0.904          | 0.012   | 12     |
| <b>SMe</b>             | E | -0.520 | 0.054 | 0.865          | 0.011   | 12     |
|                        | Z | -0.515 | 0.049 | 0.895          | 0.008   | 12     |
| <b>CF<sub>3</sub></b>  | E | -0.434 | 0.086 | 0.879          | 0.016   | 12     |
|                        | Z | -0.434 | 0.086 | 0.877          | 0.016   | 12     |
| <b>CHO</b>             | E | -0.422 | 0.088 | 0.829          | 0.020   | 12     |
|                        | Z | -0.429 | 0.107 | 0.784          | 0.028   | 12     |
| <b>CN</b>              | E | -0.424 | 0.081 | 0.860          | 0.016   | 12     |
|                        | Z | -0.424 | 0.083 | 0.857          | 0.017   | 12     |
| <b>NO<sub>2</sub></b>  | E | -0.260 | 0.093 | 0.828          | 0.021   | 12     |
|                        | Z | -0.263 | 0.094 | 0.747          | 0.027   | 12     |
| <b>F</b>               | E | 0.027  | 0.070 | 0.902          | 0.012   | 12     |
|                        | Z | 0.030  | 0.070 | 0.882          | 0.013   | 12     |

|           |          |        |       |       |       |    |
|-----------|----------|--------|-------|-------|-------|----|
| <b>Cl</b> | <i>E</i> | -0.329 | 0.059 | 0.749 | 0.017 | 12 |
|           | <i>Z</i> | -0.327 | 0.059 | 0.700 | 0.019 | 12 |

**Table S8.** Linear correlations between NBO charge at C<sup>2</sup> atom of 1,4-diazabutatrienes **1** and the group electronegativity ( $\chi$ ) of R<sup>2</sup>

$$qC^2 (a.u.) = A + B * \chi(R^2)$$

| <b>R<sup>1</sup></b>   |          | <b>A</b> | <b>B</b> | <b>r<sup>2</sup></b> | <b>Std Err</b> | <b>Points</b> |
|------------------------|----------|----------|----------|----------------------|----------------|---------------|
| <b>H</b>               | <i>E</i> | -0.036   | 0.095    | 0.927                | 0.013          | 12            |
|                        | <i>Z</i> | -0.053   | 0.099    | 0.895                | 0.017          | 12            |
| <b>Me</b>              | <i>E</i> | -0.071   | 0.099    | 0.941                | 0.012          | 12            |
|                        | <i>Z</i> | -0.074   | 0.104    | 0.890                | 0.018          | 12            |
| <b>NH<sub>2</sub></b>  | <i>E</i> | -0.274   | 0.113    | 0.789                | 0.028          | 12            |
|                        | <i>Z</i> | -0.296   | 0.120    | 0.763                | 0.032          | 12            |
| <b>NMe<sub>2</sub></b> | <i>E</i> | -0.323   | 0.115    | 0.666                | 0.039          | 12            |
|                        | <i>Z</i> | -0.322   | 0.115    | 0.712                | 0.035          | 12            |
| <b>OMe</b>             | <i>E</i> | -0.156   | 0.086    | 0.625                | 0.032          | 12            |
|                        | <i>Z</i> | -0.213   | 0.105    | 0.850                | 0.021          | 12            |
| <b>SMe</b>             | <i>E</i> | -0.149   | 0.103    | 0.785                | 0.026          | 12            |
|                        | <i>Z</i> | -0.137   | 0.099    | 0.843                | 0.021          | 12            |
| <b>CF<sub>3</sub></b>  | <i>E</i> | 0.006    | 0.090    | 0.889                | 0.015          | 12            |
|                        | <i>Z</i> | -0.004   | 0.092    | 0.902                | 0.015          | 12            |
| <b>CHO</b>             | <i>E</i> | -0.008   | 0.096    | 0.933                | 0.012          | 12            |
|                        | <i>Z</i> | -0.005   | 0.097    | 0.848                | 0.020          | 12            |
| <b>CN</b>              | <i>E</i> | 0.037    | 0.089    | 0.898                | 0.015          | 12            |
|                        | <i>Z</i> | 0.015    | 0.096    | 0.879                | 0.017          | 12            |
| <b>NO<sub>2</sub></b>  | <i>E</i> | -0.094   | 0.100    | 0.775                | 0.026          | 12            |
|                        | <i>Z</i> | -0.076   | 0.095    | 0.699                | 0.030          | 12            |
| <b>F</b>               | <i>E</i> | -0.193   | 0.096    | 0.904                | 0.015          | 12            |
|                        | <i>Z</i> | -0.202   | 0.098    | 0.886                | 0.017          | 12            |
| <b>Cl</b>              | <i>E</i> | -0.103   | 0.091    | 0.924                | 0.013          | 12            |
|                        | <i>Z</i> | -0.114   | 0.095    | 0.909                | 0.015          | 12            |

**Table S9.** Linear correlations between NBO charge at C<sup>2</sup> atom of 1,4-diazabutatrienes **1** and the resonant contribution ( $\sigma_R$ ) of R<sup>1</sup>

$$qC^2 (a.u.) = A + B * \sigma_R(R^1)$$

| <b>R<sup>2</sup></b>   |          | <b>A</b> | <b>B</b> | <b>r<sup>2</sup></b> | <b>Std Err</b> | <b>Points</b> |
|------------------------|----------|----------|----------|----------------------|----------------|---------------|
| <b>H</b>               | <i>E</i> | 0.161    | 0.247    | 0.871                | 0.034          | 12            |
|                        | <i>Z</i> | 0.168    | 0.254    | 0.879                | 0.034          | 12            |
| <b>Me</b>              | <i>E</i> | 0.180    | 0.227    | 0.836                | 0.036          | 12            |
|                        | <i>Z</i> | 0.170    | 0.242    | 0.861                | 0.035          | 12            |
| <b>NH<sub>2</sub></b>  | <i>E</i> | 0.260    | 0.223    | 0.858                | 0.033          | 12            |
|                        | <i>Z</i> | 0.265    | 0.231    | 0.830                | 0.038          | 12            |
| <b>NMe<sub>2</sub></b> | <i>E</i> | 0.275    | 0.214    | 0.866                | 0.031          | 12            |

|                       |   |       |       |       |       |    |
|-----------------------|---|-------|-------|-------|-------|----|
|                       | Z | 0.277 | 0.210 | 0.837 | 0.033 | 12 |
| <b>OMe</b>            | E | 0.281 | 0.210 | 0.863 | 0.030 | 12 |
|                       | Z | 0.289 | 0.218 | 0.822 | 0.037 | 12 |
| <b>SMe</b>            | E | 0.213 | 0.214 | 0.827 | 0.035 | 12 |
|                       | Z | 0.218 | 0.229 | 0.873 | 0.032 | 12 |
| <b>CF<sub>3</sub></b> | E | 0.204 | 0.267 | 0.893 | 0.034 | 12 |
|                       | Z | 0.204 | 0.260 | 0.887 | 0.034 | 12 |
| <b>CHO</b>            | E | 0.181 | 0.257 | 0.866 | 0.037 | 12 |
|                       | Z | 0.176 | 0.246 | 0.860 | 0.036 | 12 |
| <b>CN</b>             | E | 0.198 | 0.270 | 0.882 | 0.036 | 12 |
|                       | Z | 0.197 | 0.275 | 0.876 | 0.037 | 12 |
| <b>NO<sub>2</sub></b> | E | 0.253 | 0.281 | 0.863 | 0.041 | 12 |
|                       | Z | 0.253 | 0.260 | 0.865 | 0.037 | 12 |
| <b>F</b>              | E | 0.315 | 0.227 | 0.830 | 0.037 | 12 |
|                       | Z | 0.316 | 0.227 | 0.830 | 0.037 | 12 |
| <b>Cl</b>             | E | 0.259 | 0.232 | 0.855 | 0.035 | 12 |
|                       | Z | 0.259 | 0.235 | 0.846 | 0.036 | 12 |

## 5. Stabilization Energies

The stabilization energy values are calculated as the variation of the reaction enthalpy of the reaction shown in the schemes. Thus, the SE values shown in Table S10 are obtained as follow:

$$SE = [\Delta H \mathbf{2a(a-l)} + \Delta H \mathbf{1(a-l)b}] - [\Delta H \mathbf{1(a-l)(a-l)} + \Delta H \mathbf{2ab}]$$

**Table S10.** Computed stabilization energies (SE, kcal mol<sup>-1</sup>) following the homodesmotic reaction shown below.

|                        |   | $\begin{array}{c} \text{R}^1 \\ \text{N}=\text{C}=\text{C}=\text{N}\sim\text{R}^2 + \text{H} \\ \text{N}=\text{C}=\text{N} \\ \text{Me} \end{array} \xrightarrow{\text{SE}} \begin{array}{c} \text{R}^1 \\ \text{N}=\text{C}=\text{C}=\text{N}\sim\text{Me} + \text{H} \\ \text{N}=\text{C}=\text{N} \\ \text{R}^2 \end{array}$ |           |                       |                        |            |            |                       |            |           |                       |          |           |
|------------------------|---|---------------------------------------------------------------------------------------------------------------------------------------------------------------------------------------------------------------------------------------------------------------------------------------------------------------------------------|-----------|-----------------------|------------------------|------------|------------|-----------------------|------------|-----------|-----------------------|----------|-----------|
|                        |   | <b>R<sup>2</sup></b>                                                                                                                                                                                                                                                                                                            |           |                       |                        |            |            |                       |            |           |                       |          |           |
| <b>R<sup>1</sup></b>   |   | <b>H</b>                                                                                                                                                                                                                                                                                                                        | <b>Me</b> | <b>NH<sub>2</sub></b> | <b>NMe<sub>2</sub></b> | <b>OMe</b> | <b>SMe</b> | <b>CF<sub>3</sub></b> | <b>CHO</b> | <b>CN</b> | <b>NO<sub>2</sub></b> | <b>F</b> | <b>Cl</b> |
| <b>H</b>               | E | -3.3                                                                                                                                                                                                                                                                                                                            | 0.0       | 11.7                  | 12.9                   | 14.3       | 5.5        | -2.9                  | -4.4       | -3.1      | 3.8                   | 16.3     | 7.9       |
|                        | Z | -4.0                                                                                                                                                                                                                                                                                                                            | 0.0       | 11.6                  | 12.8                   | 14.5       | 5.5        | -3.0                  | -3.9       | -3.4      | 3.8                   | 16.4     | 8.4       |
| <b>Me</b>              | E | -3.2                                                                                                                                                                                                                                                                                                                            | 0.0       | 11.1                  | 12.0                   | 14.0       | 4.5        | -2.1                  | -3.3       | -2.1      | 4.7                   | 16.7     | 8.5       |
|                        | Z | -3.7                                                                                                                                                                                                                                                                                                                            | 0.0       | 11.4                  | 12.2                   | 14.5       | 5.3        | -2.0                  | -3.3       | -2.0      | 5.0                   | 17.2     | 9.0       |
| <b>NH<sub>2</sub></b>  | E | -2.5                                                                                                                                                                                                                                                                                                                            | 0.0       | 8.6                   | 9.5                    | 11.1       | 3.6        | -1.2                  | -2.5       | -0.7      | 4.0                   | 13.3     | 6.8       |
|                        | Z | -3.4                                                                                                                                                                                                                                                                                                                            | 0.0       | 8.3                   | 9.0                    | 11.2       | 3.9        | -1.3                  | -2.2       | -0.8      | 4.6                   | 13.4     | 6.9       |
| <b>NMe<sub>2</sub></b> | E | -2.3                                                                                                                                                                                                                                                                                                                            | 0.0       | 8.5                   | 9.3                    | 11.2       | 3.9        | 0.3                   | -0.7       | 1.8       | 6.3                   | 14.3     | 7.8       |
|                        | Z | -3.0                                                                                                                                                                                                                                                                                                                            | 0.0       | 8.2                   | 9.0                    | 11.6       | 4.2        | 0.7                   | 0.0        | 2.3       | 8.1                   | 14.7     | 8.2       |
| <b>OMe</b>             | E | -3.7                                                                                                                                                                                                                                                                                                                            | 0.0       | 8.2                   | 9.3                    | 10.0       | 3.4        | -3.0                  | -3.5       | -3.0      | 1.4                   | 10.8     | 5.1       |
|                        | Z | -3.7                                                                                                                                                                                                                                                                                                                            | 0.0       | 8.1                   | 9.3                    | 9.7        | 4.1        | -3.4                  | -3.8       | -3.6      | 1.1                   | 10.6     | 4.8       |
| <b>SMe</b>             | E | -2.2                                                                                                                                                                                                                                                                                                                            | 0.0       | 10.2                  | 11.4                   | 12.9       | 6.0        | -1.9                  | -3.0       | -1.5      | 4.2                   | 15.1     | 7.9       |
|                        | Z | -3.5                                                                                                                                                                                                                                                                                                                            | 0.0       | 9.9                   | 11.1                   | 13.2       | 5.0        | -1.0                  | -2.1       | -0.8      | 6.5                   | 15.5     | 8.4       |
| <b>CF<sub>3</sub></b>  | E | -4.0                                                                                                                                                                                                                                                                                                                            | 0.0       | 12.0                  | 14.4                   | 13.1       | 4.7        | -5.4                  | -5.4       | -6.2      | 0.2                   | 12.3     | 5.2       |
|                        | Z | -4.7                                                                                                                                                                                                                                                                                                                            | 0.0       | 12.1                  | 14.9                   | 13.1       | 6.4        | -5.7                  | -5.8       | -6.7      | 0.0                   | 12.3     | 5.3       |

|                 |   |      |     |      |      |      |     |      |      |      |      |      |     |
|-----------------|---|------|-----|------|------|------|-----|------|------|------|------|------|-----|
| CHO             | E | -4.4 | 0.0 | 11.8 | 14.6 | 13.8 | 4.8 | -4.3 | -4.6 | -4.7 | 1.9  | 14.3 | 6.5 |
|                 | Z | -4.3 | 0.0 | 12.5 | 15.5 | 14.0 | 6.5 | -4.5 | -4.8 | -5.1 | 1.9  | 14.5 | 6.7 |
| CN              | E | -4.2 | 0.0 | 12.5 | 15.9 | 13.1 | 5.1 | -6.2 | -5.9 | -7.1 | -1.0 | 11.1 | 4.4 |
|                 | Z | -5.1 | 0.0 | 12.6 | 16.4 | 12.9 | 6.5 | -6.7 | -6.4 | -7.8 | -1.4 | 10.9 | 4.3 |
| NO <sub>2</sub> | E | -4.1 | 0.0 | 10.4 | 13.6 | 10.7 | 4.0 | -6.6 | -6.0 | -7.8 | -2.2 | 8.6  | 2.9 |
|                 | Z | -4.8 | 0.0 | 11.0 | 15.3 | 10.6 | 6.9 | -7.0 | -6.4 | -8.3 | -2.4 | 8.6  | 3.0 |
| F               | E | -3.6 | 0.0 | 7.6  | 9.5  | 8.1  | 2.9 | -6.5 | -5.7 | -7.8 | -3.4 | 5.9  | 1.5 |
|                 | Z | -4.4 | 0.0 | 7.6  | 9.7  | 7.9  | 3.6 | -6.9 | -6.0 | -8.3 | -3.7 | 5.6  | 1.4 |
| Cl              | E | -3.8 | 0.0 | 9.3  | 11.3 | 10.5 | 3.8 | -5.4 | -5.3 | -6.3 | -0.9 | 9.7  | 3.9 |
|                 | Z | -4.2 | 0.0 | 9.3  | 11.4 | 10.4 | 4.8 | -5.7 | -5.5 | -6.6 | -1.0 | 9.6  | 3.8 |

**Table S11.** Computed stabilization energies (SE, kcal mol<sup>-1</sup>) following the homodesmotic reaction shown below.

$$\begin{array}{c}
 \text{R}^1 \\
 \diagdown \\
 \text{N}=\text{C}=\text{C}=\text{N}\sim\text{R}^2 \\
 \text{1(a-l)(a-l)}
 \end{array}
 +
 \begin{array}{c}
 \text{H} \\
 | \\
 \text{N}=\text{C}=\text{N} \\
 | \\
 \text{H} \\
 \text{2aa}
 \end{array}
 \xrightarrow{\text{SE}}
 \begin{array}{c}
 \text{R}^1 \\
 \diagdown \\
 \text{N}=\text{C}=\text{C}=\text{N}\sim\text{H} \\
 \text{1(a-l)a}
 \end{array}
 +
 \begin{array}{c}
 \text{H} \\
 | \\
 \text{N}=\text{C}=\text{N} \\
 | \\
 \text{R}^2 \\
 \text{2a(a-l)}
 \end{array}$$

|                        |   | <b>R<sup>2</sup></b> |           |                       |                        |            |            |                       |            |           |                       |          |           |
|------------------------|---|----------------------|-----------|-----------------------|------------------------|------------|------------|-----------------------|------------|-----------|-----------------------|----------|-----------|
| <b>R<sup>1</sup></b>   |   | <b>H</b>             | <b>Me</b> | <b>NH<sub>2</sub></b> | <b>NMe<sub>2</sub></b> | <b>OMe</b> | <b>SMe</b> | <b>CF<sub>3</sub></b> | <b>CHO</b> | <b>CN</b> | <b>NO<sub>2</sub></b> | <b>F</b> | <b>Cl</b> |
| <b>H</b>               | E | 0.0                  | 3.3       | 15.0                  | 16.2                   | 17.6       | 8.8        | 0.4                   | -1.1       | 0.2       | 7.1                   | 19.6     | 11.2      |
|                        | Z | 0.0                  | 4.0       | 15.6                  | 16.8                   | 18.4       | 9.4        | 0.9                   | 0.1        | 0.6       | 7.7                   | 20.4     | 12.4      |
| <b>Me</b>              | E | 0.0                  | 3.2       | 14.2                  | 15.2                   | 17.2       | 8.6        | 1.1                   | -0.1       | 1.1       | 7.9                   | 19.9     | 11.7      |
|                        | Z | 0.0                  | 3.7       | 15.0                  | 15.8                   | 18.1       | 9.0        | 1.6                   | 0.4        | 1.7       | 8.6                   | 20.8     | 12.6      |
| <b>NH<sub>2</sub></b>  | E | 0.0                  | 2.5       | 11.1                  | 12.0                   | 13.6       | 6.7        | 1.4                   | 0.1        | 1.9       | 6.6                   | 15.9     | 9.3       |
|                        | Z | 0.0                  | 3.4       | 11.8                  | 12.5                   | 14.6       | 7.3        | 2.1                   | 1.3        | 2.6       | 8.0                   | 16.9     | 10.3      |
| <b>NMe<sub>2</sub></b> | E | 0.0                  | 2.3       | 10.8                  | 11.6                   | 13.5       | 6.8        | 2.6                   | 1.6        | 4.1       | 8.5                   | 16.5     | 10.1      |
|                        | Z | 0.0                  | 3.0       | 11.3                  | 12.1                   | 14.6       | 7.3        | 3.8                   | 3.1        | 5.3       | 11.1                  | 17.7     | 11.2      |
| <b>OMe</b>             | E | 0.0                  | 2.9       | 11.1                  | 12.2                   | 12.9       | 6.3        | -0.1                  | -0.6       | -0.1      | 3.0                   | 13.7     | 7.9       |
|                        | Z | 0.0                  | 3.7       | 11.8                  | 13.0                   | 13.4       | 7.8        | 0.2                   | -0.1       | 0.1       | 4.8                   | 14.3     | 8.5       |
| <b>SMe</b>             | E | 0.0                  | 3.1       | 13.0                  | 14.2                   | 15.1       | 8.2        | 1.3                   | 0.1        | 1.6       | 7.2                   | 17.8     | 10.1      |
|                        | Z | 0.0                  | 3.5       | 13.5                  | 14.6                   | 16.8       | 8.5        | 2.5                   | 1.4        | 2.7       | 10.0                  | 19.0     | 11.9      |
| <b>CF<sub>3</sub></b>  | E | 0.0                  | 4.0       | 16.0                  | 18.4                   | 17.1       | 9.7        | -1.4                  | -1.4       | -2.2      | 4.2                   | 16.3     | 9.2       |
|                        | Z | 0.0                  | 4.7       | 16.7                  | 19.6                   | 17.7       | 11.0       | -1.1                  | -1.1       | -2.0      | 4.7                   | 17.0     | 10.0      |
| <b>CHO</b>             | E | 0.0                  | 4.4       | 16.2                  | 19.0                   | 18.1       | 10.0       | 0.1                   | -0.2       | -0.4      | 6.3                   | 18.7     | 10.9      |
|                        | Z | 0.0                  | 4.3       | 16.8                  | 19.8                   | 18.2       | 10.8       | -0.2                  | -0.5       | -0.8      | 6.2                   | 18.8     | 11.0      |
| <b>CN</b>              | E | 0.0                  | 4.2       | 16.7                  | 20.1                   | 17.3       | 10.2       | -2.0                  | -1.7       | -2.9      | 3.2                   | 15.3     | 8.6       |
|                        | Z | 0.0                  | 5.1       | 17.6                  | 21.5                   | 17.9       | 11.6       | -1.7                  | -1.3       | -2.7      | 3.7                   | 15.9     | 9.4       |
| <b>NO<sub>2</sub></b>  | E | 0.0                  | 4.1       | 14.5                  | 17.7                   | 13.5       | 8.9        | -2.5                  | -1.9       | -3.7      | 1.9                   | 12.7     | 7.0       |
|                        | Z | 0.0                  | 4.8       | 15.9                  | 20.2                   | 15.4       | 11.7       | -2.1                  | -1.5       | -3.5      | 2.5                   | 13.4     | 7.8       |
| <b>F</b>               | E | 0.0                  | 3.6       | 11.3                  | 13.2                   | 11.7       | 7.0        | -2.9                  | -2.0       | -4.1      | 0.2                   | 9.5      | 5.1       |
|                        | Z | 0.0                  | 4.4       | 12.0                  | 14.1                   | 12.3       | 8.0        | -2.5                  | -1.6       | -3.9      | 0.7                   | 10.0     | 5.8       |
| <b>Cl</b>              | E | 0.0                  | 3.8       | 13.1                  | 15.1                   | 14.3       | 7.7        | -1.6                  | -1.4       | -2.4      | 2.9                   | 13.5     | 7.8       |
|                        | Z | 0.0                  | 4.2       | 13.5                  | 15.6                   | 14.6       | 9.0        | -1.5                  | -1.3       | -2.4      | 3.2                   | 13.8     | 8.0       |

**Table S12.** Computed stabilization energies (SE, kcal mol<sup>-1</sup>) in different solvents following the homodesmotic reaction shown below at the PCM(solvent)/DLPNO-CSSD(T)/ma-def2-TZVPP//wB97X-D/def2-TZVPD.

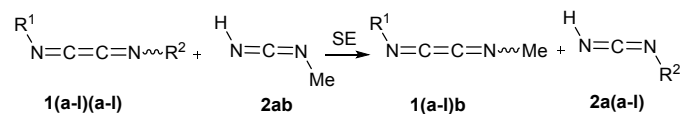

| R <sup>1</sup>         | R <sup>2</sup>         | Gas  | Acetone | MeCN | Ammonia | CCl <sub>4</sub> | DCM  | CHCl <sub>3</sub> | DMF  | DMSO | EtOH | C6   | MeOH | Pyridine | THF  | Toluene | Water |
|------------------------|------------------------|------|---------|------|---------|------------------|------|-------------------|------|------|------|------|------|----------|------|---------|-------|
| <b>CF<sub>3</sub></b>  | <b>OMe</b>             | 13.1 | 12.5    | 12.5 | 12.5    | 12.8             | 12.6 | 12.6              | 12.5 | 12.5 | 12.5 | 12.9 | 12.5 | 12.5     | 12.6 | 12.8    | 12.5  |
| <b>CHO</b>             | <b>OMe</b>             | 13.8 | 13.3    | 13.3 | 13.3    | 13.5             | 13.4 | 13.4              | 13.3 | 13.3 | 13.3 | 13.6 | 13.3 | 13.3     | 13.4 | 13.5    | 13.3  |
| <b>Me</b>              | <b>OMe</b>             | 14.0 | 14.0    | 14.0 | 14.0    | 13.9             | 14.0 | 14.0              | 14.0 | 14.0 | 14.0 | 14.0 | 14.0 | 14.0     | 14.0 | 13.9    | 14.0  |
| <b>NMe<sub>2</sub></b> | <b>F</b>               | 14.3 | 15.5    | 15.5 | 15.5    | 14.8             | 15.3 | 15.1              | 15.5 | 15.5 | 15.5 | 14.7 | 15.5 | 15.4     | 15.3 | 14.8    | 15.5  |
| <b>H</b>               | <b>OMe</b>             | 14.3 | 14.4    | 14.4 | 14.4    | 14.3             | 14.4 | 14.4              | 14.4 | 14.4 | 14.4 | 14.3 | 14.4 | 14.4     | 14.4 | 14.3    | 14.4  |
| <b>CHO</b>             | <b>F</b>               | 14.3 | 13.8    | 13.8 | 13.8    | 14.0             | 13.8 | 13.9              | 13.8 | 13.8 | 13.8 | 14.1 | 13.8 | 13.8     | 13.8 | 14.0    | 13.8  |
| <b>SMe</b>             | <b>F</b>               | 14.7 | 15.0    | 15.0 | 15.0    | 14.8             | 15.0 | 14.9              | 15.0 | 15.0 | 15.0 | 14.8 | 15.0 | 15.0     | 14.9 | 14.8    | 15.0  |
| <b>CN</b>              | <b>NMe<sub>2</sub></b> | 15.9 | 20.5    | 20.7 | 20.5    | 18.0             | 20.0 | 19.4              | 20.7 | 20.7 | 20.6 | 17.6 | 20.6 | 20.3     | 19.8 | 18.1    | 20.9  |
| <b>H</b>               | <b>F</b>               | 16.3 | 16.8    | 16.8 | 16.8    | 16.5             | 16.8 | 16.7              | 16.8 | 16.9 | 16.8 | 16.5 | 16.8 | 16.8     | 16.7 | 16.5    | 16.9  |
| <b>Me</b>              | <b>F</b>               | 16.7 | 17.2    | 17.2 | 17.2    | 16.9             | 17.1 | 17.1              | 17.2 | 17.2 | 17.2 | 16.9 | 17.2 | 17.2     | 17.1 | 16.9    | 17.2  |

## 5. Computational Data

**Table S13.** Electronic ( $E_{\text{SCF},298}$ ), Gibbs free ( $G_{298}$ ), and enthalpic ( $H_{298}$ ) energies for systems shown in Table S10 (in Hartree) computed at the DLPNO-CSSD(T)/ma-def2-TZVPP//wB97X-D/def2-TZVPD level. The wB97X-D/def2-TZVPD level of theory was used to optimize the geometries and calculate the thermal corrections.

|                                   | R <sup>1</sup>   | R <sup>2</sup>   | $E_{\text{tot}}$<br>wB97X-D/def2-<br>TZVPD | $G_{298}$<br>wB97X-<br>D/def2-<br>TZVPD | $H_{298}$<br>wB97X-<br>D/def2-<br>TZVPD | $E_{\text{tot}}$<br>DLPNO-<br>CSSD(T)/ma-<br>def2-TZVPP//<br>wB97X-<br>D/def2-<br>TZVPD | $G_{298}$<br>DLPNO-<br>CSSD(T)/ma-<br>def2-TZVPP//<br>wB97X-<br>D/def2-<br>TZVPD | $H_{298}$<br>DLPNO-<br>CSSD(T)/ma-<br>def2-TZVPP//<br>wB97X-<br>D/def2-<br>TZVPD |
|-----------------------------------|------------------|------------------|--------------------------------------------|-----------------------------------------|-----------------------------------------|-----------------------------------------------------------------------------------------|----------------------------------------------------------------------------------|----------------------------------------------------------------------------------|
| (E)-1,4-Duazabutatrienes <b>1</b> |                  |                  |                                            |                                         |                                         |                                                                                         |                                                                                  |                                                                                  |
| <i>E-1aa</i>                      | H                | H                | -186.80982                                 | -186.79729                              | -186.76650                              | -186.49807                                                                              | -186.48554                                                                       | -186.45475                                                                       |
| <i>E-1ab</i>                      | H                | Me               | -226.12086                                 | -226.08274                              | -226.04756                              | -225.73122                                                                              | -225.69310                                                                       | -225.65792                                                                       |
| <i>E-1ac</i>                      | H                | NH <sub>2</sub>  | -242.15018                                 | -242.12231                              | -242.08799                              | -241.74683                                                                              | -241.71895                                                                       | -241.68464                                                                       |
| <i>E-1ad</i>                      | H                | NMe <sub>2</sub> | -320.77394                                 | -320.69475                              | -320.65281                              | -320.21620                                                                              | -320.13701                                                                       | -320.09507                                                                       |
| <i>E-1ae</i>                      | H                | OMe              | -301.30276                                 | -301.26230                              | -301.22416                              | -300.81084                                                                              | -300.77038                                                                       | -300.73224                                                                       |
| <i>E-1af</i>                      | H                | SMe              | -624.32338                                 | -624.28721                              | -624.24782                              | -623.46217                                                                              | -623.42600                                                                       | -623.38661                                                                       |
| <i>E-1ag</i>                      | H                | CF <sub>3</sub>  | -523.90976                                 | -523.89879                              | -523.85771                              | -523.16697                                                                              | -523.15600                                                                       | -523.11492                                                                       |
| <i>E-1ah</i>                      | H                | CHO              | -300.13549                                 | -300.11892                              | -300.08076                              | -299.65064                                                                              | -299.63406                                                                       | -299.59591                                                                       |
| <i>E-1ai</i>                      | H                | CN               | -279.02883                                 | -279.02074                              | -278.98508                              | -278.56847                                                                              | -278.56038                                                                       | -278.52472                                                                       |
| <i>E-1aj</i>                      | H                | NO <sub>2</sub>  | -391.30362                                 | -391.29441                              | -391.25516                              | -390.70062                                                                              | -390.69141                                                                       | -390.65217                                                                       |
| <i>E-1ak</i>                      | H                | F                | -286.00330                                 | -286.00145                              | -285.96764                              | -285.57004                                                                              | -285.56819                                                                       | -285.53438                                                                       |
| <i>E-1al</i>                      | H                | Cl               | -646.38742                                 | -646.38753                              | -646.35243                              | -645.59117                                                                              | -645.59128                                                                       | -645.55618                                                                       |
| <i>E-1ab</i>                      | Me               | Me               | -265.43131                                 | -265.36766                              | -265.32813                              | -264.96408                                                                              | -264.90043                                                                       | -264.86090                                                                       |
| <i>E-1bc</i>                      | Me               | NH <sub>2</sub>  | -281.45888                                 | -281.40549                              | -281.36675                              | -280.97872                                                                              | -280.92533                                                                       | -280.88659                                                                       |
| <i>E-1bd</i>                      | Me               | NMe <sub>2</sub> | -360.08195                                 | -359.97710                              | -359.93099                              | -359.44759                                                                              | -359.34273                                                                       | -359.29663                                                                       |
| <i>E-1be</i>                      | Me               | OMe              | -340.61245                                 | -340.54658                              | -340.50391                              | -340.04330                                                                              | -339.97743                                                                       | -339.93475                                                                       |
| <i>E-1bf</i>                      | Me               | SMe              | -663.63329                                 | -663.57168                              | -663.52786                              | -662.69494                                                                              | -662.63333                                                                       | -662.58951                                                                       |
| <i>E-1bg</i>                      | Me               | CF <sub>3</sub>  | -563.22202                                 | -563.18553                              | -563.14005                              | -562.40117                                                                              | -562.36467                                                                       | -562.31920                                                                       |
| <i>E-1bh</i>                      | Me               | CHO              | -339.44964                                 | -339.40645                              | -339.36484                              | -338.88556                                                                              | -338.84236                                                                       | -338.80075                                                                       |
| <i>E-1bi</i>                      | Me               | CN               | -318.34158                                 | -318.30790                              | -318.26784                              | -317.80305                                                                              | -317.76936                                                                       | -317.72931                                                                       |
| <i>E-1bj</i>                      | Me               | NO <sub>2</sub>  | -430.61601                                 | -430.58143                              | -430.53755                              | -429.93504                                                                              | -429.90045                                                                       | -429.85658                                                                       |
| <i>E-1bk</i>                      | Me               | F                | -325.31483                                 | -325.28758                              | -325.24909                              | -324.80382                                                                              | -324.77657                                                                       | -324.73808                                                                       |
| <i>E-1bl</i>                      | Me               | Cl               | -685.69912                                 | -685.67371                              | -685.63414                              | -684.82519                                                                              | -684.79978                                                                       | -684.76021                                                                       |
| <i>E-1cc</i>                      | NH <sub>2</sub>  | NH <sub>2</sub>  | -297.48112                                 | -297.43757                              | -297.40003                              | -296.98944                                                                              | -296.94589                                                                       | -296.90836                                                                       |
| <i>E-1cd</i>                      | NH <sub>2</sub>  | NMe <sub>2</sub> | -376.10308                                 | -376.00784                              | -375.96332                              | -375.45806                                                                              | -375.36282                                                                       | -375.31829                                                                       |
| <i>E-1ce</i>                      | NH <sub>2</sub>  | OMe              | -356.63485                                 | -356.57892                              | -356.53749                              | -356.05322                                                                              | -355.99729                                                                       | -355.95585                                                                       |
| <i>E-1cf</i>                      | NH <sub>2</sub>  | SMe              | -679.65841                                 | -679.60687                              | -679.56406                              | -678.70759                                                                              | -678.65605                                                                       | -678.61323                                                                       |
| <i>E-1cg</i>                      | NH <sub>2</sub>  | CF <sub>3</sub>  | -579.25287                                 | -579.22714                              | -579.18207                              | -578.41712                                                                              | -578.39139                                                                       | -578.34632                                                                       |
| <i>E-1ch</i>                      | NH <sub>2</sub>  | CHO              | -355.48010                                 | -355.44743                              | -355.40628                              | -354.90148                                                                              | -354.86881                                                                       | -354.82766                                                                       |
| <i>E-1ci</i>                      | NH <sub>2</sub>  | CN               | -334.37444                                 | -334.35260                              | -334.31173                              | -333.82001                                                                              | -333.79816                                                                       | -333.75730                                                                       |
| <i>E-1cj</i>                      | NH <sub>2</sub>  | NO <sub>2</sub>  | -446.64410                                 | -446.62062                              | -446.57689                              | -445.94842                                                                              | -445.92493                                                                       | -445.88121                                                                       |
| <i>E-1ck</i>                      | NH <sub>2</sub>  | F                | -341.33717                                 | -341.31967                              | -341.28259                              | -340.81289                                                                              | -340.79539                                                                       | -340.75832                                                                       |
| <i>E-1cl</i>                      | NH <sub>2</sub>  | Cl               | -701.72458                                 | -701.70904                              | -701.67072                              | -700.83697                                                                              | -700.82144                                                                       | -700.78312                                                                       |
| <i>E-1dd</i>                      | NMe <sub>2</sub> | NMe <sub>2</sub> | -454.72454                                 | -454.57745                              | -454.52617                              | -453.92633                                                                              | -453.77924                                                                       | -453.72796                                                                       |
| <i>E-1de</i>                      | NMe <sub>2</sub> | OMe              | -435.25765                                 | -435.15017                              | -435.10155                              | -434.52220                                                                              | -434.41472                                                                       | -434.36610                                                                       |
| <i>E-1df</i>                      | NMe <sub>2</sub> | SMe              | -758.28137                                 | -758.17828                              | -758.12821                              | -757.17691                                                                              | -757.07382                                                                       | -757.02376                                                                       |



|                            |                  |                  |             |             |             |             |             |             |
|----------------------------|------------------|------------------|-------------|-------------|-------------|-------------|-------------|-------------|
| <b>E-1dg</b>               | NMe <sub>2</sub> | CF <sub>3</sub>  | -657.87929  | -657.80296  | -657.74939  | -656.88867  | -656.81233  | -656.75877  |
| <b>E-1dh</b>               | NMe <sub>2</sub> | CHO              | -434.10672  | -434.02253  | -433.97387  | -433.37346  | -433.28926  | -433.24060  |
| <b>E-1di</b>               | NMe <sub>2</sub> | CN               | -413.00225  | -412.92730  | -412.88022  | -412.29331  | -412.21836  | -412.17128  |
| <b>E-1dj</b>               | NMe <sub>2</sub> | NO <sub>2</sub>  | -525.27167  | -525.19617  | -525.14524  | -524.42122  | -524.34571  | -524.29479  |
| <b>E-1dk</b>               | NMe <sub>2</sub> | F                | -419.96162  | -419.89269  | -419.84819  | -419.28329  | -419.21436  | -419.16986  |
| <b>E-1dl</b>               | NMe <sub>2</sub> | Cl               | -780.34935  | -780.28251  | -780.23657  | -779.30751  | -779.24067  | -779.19473  |
| <b>E-1ee</b>               | OMe              | OMe              | -415.78700  | -415.71853  | -415.67325  | -415.11606  | -415.04758  | -415.00230  |
| <b>E-1ef</b>               | OMe              | SMe              | -738.81067  | -738.74693  | -738.69979  | -737.77103  | -737.70730  | -737.66015  |
| <b>E-1eg</b>               | OMe              | CF <sub>3</sub>  | -638.40244  | -638.36369  | -638.31507  | -637.47905  | -637.44030  | -637.39167  |
| <b>E-1eh</b>               | OMe              | CHO              | -414.63092  | -414.58527  | -414.54064  | -413.96454  | -413.91888  | -413.87425  |
| <b>E-1ei</b>               | OMe              | CN               | -393.52244  | -393.48615  | -393.44315  | -392.88101  | -392.84472  | -392.80172  |
| <b>E-1ej</b>               | OMe              | NO <sub>2</sub>  | -505.79067  | -505.75284  | -505.70694  | -505.00681  | -504.96899  | -504.92308  |
| <b>E-1ek</b>               | OMe              | F                | -400.48621  | -400.45604  | -400.41520  | -399.87351  | -399.84335  | -399.80251  |
| <b>E-1el</b>               | OMe              | Cl               | -760.87466  | -760.84643  | -760.80437  | -759.89879  | -759.87056  | -759.82850  |
| <b>E-1ff</b>               | SMe              | SMe              | -1061.83441 | -1061.77442 | -1061.72670 | -1060.42529 | -1060.36529 | -1060.31758 |
| <b>E-1fg</b>               | SMe              | CF <sub>3</sub>  | -961.42504  | -961.39049  | -961.34086  | -960.13245  | -960.09789  | -960.04826  |
| <b>E-1fh</b>               | SMe              | CHO              | -737.65175  | -737.61049  | -737.56475  | -736.61670  | -736.57544  | -736.52970  |
| <b>E-1fi</b>               | SMe              | CN               | -716.54559  | -716.51355  | -716.46951  | -715.53492  | -715.50288  | -715.45884  |
| <b>E-1fj</b>               | SMe              | NO <sub>2</sub>  | -828.81734  | -828.78514  | -828.73666  | -827.66484  | -827.63263  | -827.58415  |
| <b>E-1fk</b>               | SMe              | F                | -723.51339  | -723.48779  | -723.44551  | -722.53129  | -722.50569  | -722.46341  |
| <b>E-1fl</b>               | SMe              | Cl               | -1083.89808 | -1083.87466 | -1083.83075 | -1082.55361 | -1082.53020 | -1082.48628 |
| <b>E-1gg</b>               | CF <sub>3</sub>  | CF <sub>3</sub>  | -861.00676  | -860.99713  | -860.94597  | -859.83303  | -859.82340  | -859.77224  |
| <b>E-1gh</b>               | CF <sub>3</sub>  | CHO              | -637.23601  | -637.21993  | -637.17243  | -636.31917  | -636.30309  | -636.25559  |
| <b>E-1gi</b>               | CF <sub>3</sub>  | CN               | -616.12475  | -616.11818  | -616.07222  | -615.23355  | -615.22698  | -615.18102  |
| <b>E-1gj</b>               | CF <sub>3</sub>  | NO <sub>2</sub>  | -728.39867  | -728.39090  | -728.34148  | -727.36486  | -727.35710  | -727.30767  |
| <b>E-1gk</b>               | CF <sub>3</sub>  | F                | -623.09809  | -623.09768  | -623.05356  | -622.23387  | -622.23345  | -622.18933  |
| <b>E-1gl</b>               | CF <sub>3</sub>  | Cl               | -983.48406  | -983.48559  | -983.44030  | -982.25695  | -982.25848  | -982.21320  |
| <b>E-1hh</b>               | CHO              | CHO              | -413.46495  | -413.44207  | -413.39856  | -412.80486  | -412.78198  | -412.73847  |
| <b>E-1hi</b>               | CHO              | CN               | -392.35444  | -392.34119  | -392.29915  | -391.72024  | -391.70699  | -391.66496  |
| <b>E-1hj</b>               | CHO              | NO <sub>2</sub>  | -504.62886  | -504.61445  | -504.56886  | -503.85206  | -503.83765  | -503.79205  |
| <b>E-1hk</b>               | CHO              | F                | -399.32871  | -399.32162  | -399.28134  | -398.72143  | -398.71434  | -398.67407  |
| <b>E-1hl</b>               | CHO              | Cl               | -759.71366  | -759.70853  | -759.66707  | -758.74342  | -758.73829  | -758.69683  |
| <b>E-1ii</b>               | CN               | CN               | -371.24274  | -371.23905  | -371.19851  | -370.63395  | -370.63026  | -370.58972  |
| <b>E-1ij</b>               | CN               | NO <sub>2</sub>  | -483.51601  | -483.51101  | -483.46708  | -482.76483  | -482.75984  | -482.71590  |
| <b>E-1ik</b>               | CN               | F                | -378.21567  | -378.21792  | -378.17931  | -377.63380  | -377.63605  | -377.59744  |
| <b>E-1il</b>               | CN               | Cl               | -738.60223  | -738.60644  | -738.56668  | -737.65754  | -737.66175  | -737.62198  |
| <b>E-1jj</b>               | NO <sub>2</sub>  | NO <sub>2</sub>  | -595.78837  | -595.78218  | -595.73484  | -594.89478  | -594.88858  | -594.84124  |
| <b>E-1jk</b>               | NO <sub>2</sub>  | F                | -490.48572  | -490.48673  | -490.44480  | -489.76170  | -489.76271  | -489.72078  |
| <b>E-1jl</b>               | NO <sub>2</sub>  | Cl               | -850.87414  | -850.87720  | -850.83398  | -849.78713  | -849.79019  | -849.74697  |
| <b>E-1kk</b>               | F                | F                | -385.17964  | -385.18776  | -385.15139  | -384.62622  | -384.63435  | -384.59797  |
| <b>E-1kl</b>               | F                | Cl               | -745.57046  | -745.58072  | -745.54300  | -744.65363  | -744.66388  | -744.62616  |
| <b>E-1ll</b>               | Cl               | Cl               | -1105.95871 | -1105.97095 | -1105.93201 | -1104.67882 | -1104.69107 | -1104.65213 |
| (Z)-1,4-Diazabutatrienes 1 |                  |                  |             |             |             |             |             |             |
| <b>Z-1aa</b>               | H                | H                | -186.80817  | -186.79584  | -186.76483  | -186.49550  | -186.48317  | -186.45216  |
| <b>Z-1ab</b>               | H                | Me               | -226.11987  | -226.08197  | -226.04654  | -225.72971  | -225.69181  | -225.65638  |
| <b>Z-1ac</b>               | H                | NH <sub>2</sub>  | -242.14892  | -242.12124  | -242.08673  | -241.74513  | -241.71746  | -241.68294  |
| <b>Z-1ad</b>               | H                | NMe <sub>2</sub> | -320.77257  | -320.69356  | -320.65148  | -320.21443  | -320.13542  | -320.09334  |
| <b>Z-1ae</b>               | H                | OMe              | -301.30210  | -301.26188  | -301.22348  | -300.80961  | -300.76939  | -300.73100  |

|       |                  |                  |             |             |             |             |             |             |
|-------|------------------|------------------|-------------|-------------|-------------|-------------|-------------|-------------|
| Z-1af | H                | SMe              | -624.32206  | -624.28590  | -624.24651  | -623.46058  | -623.42442  | -623.38502  |
| Z-1ag | H                | CF <sub>3</sub>  | -523.90896  | -523.89816  | -523.85684  | -523.16531  | -523.15451  | -523.11319  |
| Z-1ah | H                | CHO              | -300.13695  | -300.11947  | -300.08197  | -299.65017  | -299.63269  | -299.59519  |
| Z-1ai | H                | CN               | -279.02774  | -279.01988  | -278.98392  | -278.56655  | -278.55870  | -278.52273  |
| Z-1aj | H                | NO <sub>2</sub>  | -391.30284  | -391.29427  | -391.25435  | -390.69909  | -390.69051  | -390.65059  |
| Z-1ak | H                | F                | -286.00261  | -286.00116  | -285.96693  | -285.56877  | -285.56731  | -285.53308  |
| Z-1al | H                | Cl               | -646.38708  | -646.38730  | -646.35209  | -645.59045  | -645.59067  | -645.55546  |
| Z-1ab | Me               | Me               | -265.43090  | -265.36748  | -265.32773  | -264.96327  | -264.89985  | -264.86010  |
| Z-1bc | Me               | NH <sub>2</sub>  | -281.45861  | -281.40533  | -281.36653  | -280.97840  | -280.92513  | -280.88633  |
| Z-1bd | Me               | NMe <sub>2</sub> | -360.08152  | -359.97686  | -359.93064  | -359.44697  | -359.34231  | -359.29609  |
| Z-1be | Me               | OMe              | -340.61260  | -340.54681  | -340.50406  | -340.04327  | -339.97748  | -339.93474  |
| Z-1bf | Me               | SMe              | -663.63254  | -663.57114  | -663.52718  | -662.69391  | -662.63251  | -662.58855  |
| Z-1bg | Me               | CF <sub>3</sub>  | -563.22186  | -563.18564  | -563.13988  | -562.40048  | -562.36426  | -562.31850  |
| Z-1bh | Me               | CHO              | -339.44938  | -339.40638  | -339.36449  | -338.88479  | -338.84180  | -338.79991  |
| Z-1bi | Me               | CN               | -318.34135  | -318.30785  | -318.26760  | -317.80245  | -317.76895  | -317.72870  |
| Z-1bj | Me               | NO <sub>2</sub>  | -430.61594  | -430.58192  | -430.53750  | -429.93465  | -429.90062  | -429.85620  |
| Z-1bk | Me               | F                | -325.31478  | -325.28780  | -325.24909  | -324.80370  | -324.77672  | -324.73800  |
| Z-1bl | Me               | Cl               | -685.69909  | -685.67375  | -685.63413  | -684.82502  | -684.79967  | -684.76006  |
| Z-1cc | NH <sub>2</sub>  | NH <sub>2</sub>  | -297.48050  | -297.43706  | -297.39946  | -296.98875  | -296.94530  | -296.90771  |
| Z-1cd | NH <sub>2</sub>  | NMe <sub>2</sub> | -376.10227  | -376.00716  | -375.96257  | -375.45702  | -375.36192  | -375.31732  |
| Z-1ce | NH <sub>2</sub>  | OMe              | -356.63491  | -356.57899  | -356.53755  | -356.05310  | -355.99718  | -355.95574  |
| Z-1cf | NH <sub>2</sub>  | SMe              | -679.65754  | -679.60607  | -679.56329  | -678.70670  | -678.65523  | -678.61244  |
| Z-1cg | NH <sub>2</sub>  | CF <sub>3</sub>  | -579.25285  | -579.22741  | -579.18207  | -578.41662  | -578.39118  | -578.34584  |
| Z-1ch | NH <sub>2</sub>  | CHO              | -355.48065  | -355.44767  | -355.40673  | -354.90181  | -354.86883  | -354.82790  |
| Z-1ci | NH <sub>2</sub>  | CN               | -334.37442  | -334.35206  | -334.31168  | -333.81954  | -333.79719  | -333.75681  |
| Z-1cj | NH <sub>2</sub>  | NO <sub>2</sub>  | -446.64521  | -446.62158  | -446.57804  | -445.94904  | -445.92541  | -445.88186  |
| Z-1ck | NH <sub>2</sub>  | F                | -341.33720  | -341.31980  | -341.28267  | -340.81278  | -340.79538  | -340.75825  |
| Z-1cl | NH <sub>2</sub>  | Cl               | -701.72458  | -701.70909  | -701.67075  | -700.83677  | -700.82129  | -700.78294  |
| Z-1dd | NMe <sub>2</sub> | NMe <sub>2</sub> | -454.72403  | -454.57695  | -454.52572  | -453.92538  | -453.77830  | -453.72707  |
| Z-1de | NMe <sub>2</sub> | OMe              | -435.25785  | -435.15037  | -435.10178  | -434.52222  | -434.41473  | -434.36615  |
| Z-1df | NMe <sub>2</sub> | SMe              | -758.28068  | -758.17727  | -758.12756  | -757.17593  | -757.07252  | -757.02281  |
| Z-1dg | NMe <sub>2</sub> | CF <sub>3</sub>  | -657.87989  | -657.80329  | -657.75000  | -656.88879  | -656.81218  | -656.75890  |
| Z-1dh | NMe <sub>2</sub> | CHO              | -434.10825  | -434.02360  | -433.97506  | -433.37439  | -433.28974  | -433.24120  |
| Z-1di | NMe <sub>2</sub> | CN               | -413.00268  | -412.92760  | -412.88064  | -412.29352  | -412.21844  | -412.17147  |
| Z-1dj | NMe <sub>2</sub> | NO <sub>2</sub>  | -525.27425  | -525.19762  | -525.14782  | -524.42362  | -524.34699  | -524.29718  |
| Z-1dk | NMe <sub>2</sub> | F                | -419.96190  | -419.89308  | -419.84852  | -419.28340  | -419.21457  | -419.17001  |
| Z-1dl | NMe <sub>2</sub> | Cl               | -780.34975  | -780.28298  | -780.23697  | -779.30760  | -779.24083  | -779.19483  |
| Z-1ee | OMe              | OMe              | -415.78681  | -415.71825  | -415.67306  | -415.11559  | -415.04703  | -415.00184  |
| Z-1ef | OMe              | SMe              | -738.81204  | -738.74797  | -738.70135  | -737.77188  | -737.70782  | -737.66120  |
| Z-1eg | OMe              | CF <sub>3</sub>  | -638.40206  | -638.36326  | -638.31469  | -637.47829  | -637.43949  | -637.39092  |
| Z-1eh | OMe              | CHO              | -414.63065  | -414.58522  | -414.54035  | -413.96404  | -413.91861  | -413.87374  |
| Z-1ei | OMe              | CN               | -393.52198  | -393.48565  | -393.44267  | -392.88012  | -392.84379  | -392.80081  |
| Z-1ej | OMe              | NO <sub>2</sub>  | -505.79232  | -505.75532  | -505.70848  | -505.00852  | -504.97152  | -504.92468  |
| Z-1ek | OMe              | F                | -400.48598  | -400.45582  | -400.41499  | -399.87317  | -399.84302  | -399.80218  |
| Z-1el | OMe              | Cl               | -760.87447  | -760.84622  | -760.80419  | -759.89844  | -759.87019  | -759.82815  |
| Z-1ff | SMe              | SMe              | -1061.83298 | -1061.77349 | -1061.72514 | -1060.42425 | -1060.36475 | -1060.31641 |
| Z-1fg | SMe              | CF <sub>3</sub>  | -961.42576  | -961.39110  | -961.34160  | -960.13276  | -960.09810  | -960.04860  |
| Z-1fh | SMe              | CHO              | -737.65317  | -737.61164  | -737.56592  | -736.61744  | -736.57591  | -736.53019  |

|                 |                 |                  |             |             |             |             |             |             |
|-----------------|-----------------|------------------|-------------|-------------|-------------|-------------|-------------|-------------|
| Z-1fi           | SMe             | CN               | -716.54606  | -716.51404  | -716.46998  | -715.53508  | -715.50306  | -715.45900  |
| Z-1fj           | SMe             | NO <sub>2</sub>  | -828.81949  | -828.78695  | -828.73906  | -827.66751  | -827.63497  | -827.58708  |
| Z-1fk           | SMe             | F                | -723.51370  | -723.48823  | -723.44588  | -722.53153  | -722.50606  | -722.46371  |
| Z-1fl           | SMe             | Cl               | -1083.89978 | -1083.87608 | -1083.83265 | -1082.55474 | -1082.53103 | -1082.48761 |
| Z-1gg           | CF <sub>3</sub> | CF <sub>3</sub>  | -861.00635  | -860.99705  | -860.94549  | -859.83190  | -859.82260  | -859.77103  |
| Z-1gh           | CF <sub>3</sub> | CHO              | -637.23549  | -637.21955  | -637.17184  | -636.31799  | -636.30205  | -636.25434  |
| Z-1gi           | CF <sub>3</sub> | CN               | -616.12408  | -616.11764  | -616.07149  | -615.23222  | -615.22577  | -615.17962  |
| Z-1gj           | CF <sub>3</sub> | NO <sub>2</sub>  | -728.39837  | -728.39084  | -728.34115  | -727.36398  | -727.35645  | -727.30676  |
| Z-1gk           | CF <sub>3</sub> | F                | -623.09772  | -623.09751  | -623.05320  | -622.23314  | -622.23292  | -622.18862  |
| Z-1gl           | CF <sub>3</sub> | Cl               | -983.48385  | -983.48537  | -983.44009  | -982.25643  | -982.25795  | -982.21267  |
| Z-1hh           | CHO             | CHO              | -413.46449  | -413.44191  | -413.39798  | -412.80378  | -412.78119  | -412.73727  |
| Z-1hi           | CHO             | CN               | -392.35372  | -392.34062  | -392.29835  | -391.71898  | -391.70588  | -391.66361  |
| Z-1hj           | CHO             | NO <sub>2</sub>  | -504.62844  | -504.61442  | -504.56842  | -503.85112  | -503.83710  | -503.79110  |
| Z-1hk           | CHO             | F                | -399.32838  | -399.32155  | -399.28103  | -398.72084  | -398.71401  | -398.67349  |
| Z-1hl           | CHO             | Cl               | -759.71348  | -759.70837  | -759.66687  | -758.74293  | -758.73782  | -758.69632  |
| Z-1ii           | CN              | CN               | -371.24181  | -371.23822  | -371.19750  | -370.63238  | -370.62879  | -370.58807  |
| Z-1ij           | CN              | NO <sub>2</sub>  | -483.51543  | -483.51073  | -483.46648  | -482.76366  | -482.75896  | -482.71471  |
| Z-1ik           | CN              | F                | -378.21514  | -378.21754  | -378.17878  | -377.63288  | -377.63528  | -377.59652  |
| Z-1il           | CN              | Cl               | -738.60190  | -738.60615  | -738.56633  | -737.65685  | -737.66110  | -737.62128  |
| Z-1jj           | NO <sub>2</sub> | NO <sub>2</sub>  | -595.78813  | -595.78233  | -595.73460  | -594.89415  | -594.88835  | -594.84062  |
| Z-1jk           | NO <sub>2</sub> | F                | -490.48557  | -490.48675  | -490.44467  | -489.76125  | -489.76244  | -489.72035  |
| Z-1jl           | NO <sub>2</sub> | Cl               | -850.87404  | -850.87725  | -850.83390  | -849.78675  | -849.78997  | -849.74661  |
| Z-1kk           | F               | F                | -385.17939  | -385.18756  | -385.15115  | -384.62571  | -384.63388  | -384.59748  |
| Z-1kl           | F               | Cl               | -745.57026  | -745.58055  | -745.54281  | -744.65334  | -744.66363  | -744.62590  |
| Z-1ll           | Cl              | Cl               | -1105.95853 | -1105.97077 | -1105.93183 | -1104.67854 | -1104.69078 | -1104.65185 |
| Carbodiimides 2 |                 |                  |             |             |             |             |             |             |
| 2aa             | H               | H                | -148.792222 | -148.782503 | -148.754778 | -148.547762 | -148.538043 | -148.510318 |
| 2ab             | H               | Me               | -188.097980 | -188.062977 | -188.030019 | -187.776178 | -187.741174 | -187.708216 |
| 2ac             | H               | NH <sub>2</sub>  | -204.104955 | -204.079798 | -204.048124 | -203.773128 | -203.747971 | -203.716297 |
| 2ad             | H               | NMe <sub>2</sub> | -282.724668 | -282.647620 | -282.609424 | -282.240037 | -282.162989 | -282.124793 |
| 2ae             | H               | OMe              | -263.254928 | -263.217439 | -263.182050 | -262.832676 | -262.795187 | -262.759798 |
| 2af             | H               | SMe              | -586.290170 | -586.257227 | -586.219996 | -585.498336 | -585.465393 | -585.428162 |
| 2ag             | H               | CF <sub>3</sub>  | -485.891868 | -485.885107 | -485.845498 | -485.216220 | -485.209460 | -485.169851 |
| 2ah             | H               | CHO              | -262.121040 | -262.106286 | -262.071866 | -261.702436 | -261.687682 | -261.653262 |
| 2ai             | H               | CN               | -241.011956 | -241.006434 | -240.973665 | -240.618273 | -240.612751 | -240.579982 |
| 2aj             | H               | NO <sub>2</sub>  | -353.274705 | -353.267706 | -353.231955 | -352.739162 | -352.732163 | -352.696412 |
| 2ak             | H               | F                | -247.952153 | -247.952756 | -247.922006 | -247.588877 | -247.589479 | -247.558729 |
| 2al             | H               | Cl               | -608.351160 | -608.353636 | -608.321662 | -607.623409 | -607.625885 | -607.593911 |

## 6. References

- 1 J.-D. Chai and M. Head-Gordon, *Phys. Chem. Chem. Phys.*, 2008, **10**, 6615.
- 2 D. Rappoport and F. Furche, *J. Chem. Phys.*, DOI:10.1063/1.3484283.
- 3 F. Weigend and R. Ahlrichs, *Phys. Chem. Chem. Phys.*, 2005, **7**, 3297.
- 4 R. Bauernschmitt and R. Ahlrichs, *J. Chem. Phys.*, 1996, **104**, 9047–9052.
- 5 C. Riplinger and F. Neese, *J. Chem. Phys.*, 2013, **138**, 034106.
- 6 J. Zheng, X. Xu and D. G. Truhlar, *Theor. Chem. Acc.*, 2011, **128**, 295–305.
- 7 M. J. Frisch, G. W. Trucks, H. B. Schlegel, G. E. Scuseria, M. A. Robb, J. R. Cheeseman, G. Scalmani, V. Barone,

G. A. Petersson, H. Nakatsuji, X. Li, M. Caricato, A. V. Marenich, J. Bloino, B. G. Janesko, R. Gomperts, B. Mennucci, H. P. Hratchian, J. V. Ortiz, A. F. Izmaylov, J. L. Sonnenberg, D. Williams-Young, F. Ding, F. Lipparini, F. Egidi, J. Goings, B. Peng, A. Petrone, T. Henderson, D. Ranasinghe, V. G. Zakrzewski, J. Gao, N. Rega, G. Zheng, W. Liang, M. Hada, M. Ehara, K. Toyota, R. Fukuda, J. Hasegawa, M. Ishida, T. Nakajima, Y. Honda, O. Kitao, H. Nakai, T. Vreven, K. Throssell, J. A. Montgomery Jr., J. E. Peralta, F. Ogliaro, M. J. Bearpark, J. J. Heyd, E. N. Brothers, K. N. Kudin, V. N. Staroverov, T. A. Keith, R. Kobayashi, J. Normand, K. Raghavachari, A. P. Rendell, J. C. Burant, S. S. Iyengar, J. Tomasi, M. Cossi, J. M. Millam, M. Klene, C. Adamo, R. Cammi, J. W. Ochterski, R. L. Martin, K. Morokuma, O. Farkas, J. B. Foresman and D. J. Fox, *Gaussian 09 version D.01*, Gaussian, Inc., Wallingford CT, 2009.

- 8 F. Neese, *Wiley Interdiscip. Rev. Comput. Mol. Sci.*, 2012, **2**, 73–78.  
 9 F. Weinhold, C. R. Landis and E. D. Glendening, *Int. Rev. Phys. Chem.*, 2016, **35**, 399–440.  
 10 E. D. Glendening, J. K. Badenhoop, A. E. Reed, J. E. Carpenter, J. A. Bohmann, C. M. Morales, P. Karafiloglou, C. R. Landis and F. Weinhold, *NBO 7.0*, Madison, 2018.  
 11 R. J. Boyd and S. L. Boyd, *J. Am. Chem. Soc.*, 1992, **114**, 1652–1655.  
 12 C. Hansch, A. Leo and R. W. Taft, *Chem. Rev.*, 1991, **91**, 165–195.

## 7. Cartesian Coordinates

### (E)-1,4-Duazabutatrienes 1

#### E-1aa

SCF = -186.809821135  
 Num. Imaginary Freq = 0

|   |           |           |           |
|---|-----------|-----------|-----------|
| C | -0.639071 | 0.086712  | 0.000007  |
| N | -1.851788 | -0.154883 | 0.000030  |
| C | 0.639075  | -0.086779 | -0.000024 |
| N | 1.851775  | 0.154927  | -0.000038 |
| H | 2.423596  | -0.691219 | 0.000031  |
| H | -2.423528 | 0.691316  | 0.000130  |

#### E-1ab

SCF = -226.120856287  
 Num. Imaginary Freq = 0

|   |           |           |           |
|---|-----------|-----------|-----------|
| C | 0.041890  | -0.174538 | 0.000012  |
| N | -1.119523 | -0.588838 | 0.000055  |
| C | 1.323330  | -0.089148 | -0.000007 |
| N | 2.487481  | 0.329185  | -0.000053 |
| C | -2.225651 | 0.353230  | -0.000001 |
| H | -1.908489 | 1.398880  | -0.000079 |
| H | -2.841374 | 0.152037  | -0.878018 |
| H | -2.841356 | 0.152162  | 0.878058  |
| H | 3.178096  | -0.422773 | 0.000007  |

#### E-1ac

SCF = -242.150179115  
 Num. Imaginary Freq = 0

|   |           |           |           |
|---|-----------|-----------|-----------|
| C | 0.020037  | -0.096646 | 0.000057  |
| N | -1.150829 | -0.543981 | 0.008536  |
| C | 1.292779  | -0.051857 | 0.001499  |
| N | 2.484419  | 0.268383  | -0.001050 |
| N | -2.181358 | 0.308776  | -0.069467 |

|   |           |           |          |
|---|-----------|-----------|----------|
| H | -2.016001 | 1.277481  | 0.170997 |
| H | -3.050220 | -0.095101 | 0.232031 |
| H | 3.123710  | -0.523606 | 0.021496 |

#### E-1ad

SCF = -320.773942248  
 Num. Imaginary Freq = 0

|   |           |           |           |
|---|-----------|-----------|-----------|
| C | -2.161951 | -0.176574 | 0.011861  |
| N | -3.341222 | 0.197006  | 0.050462  |
| C | -0.899545 | -0.296240 | -0.024610 |
| N | 0.259342  | -0.797428 | -0.078465 |
| N | 1.317093  | -0.007251 | -0.159200 |
| C | 1.173212  | 1.418015  | 0.008316  |
| H | 2.136940  | 1.893590  | -0.161715 |
| H | 0.446781  | 1.803548  | -0.709140 |
| H | 0.816218  | 1.665196  | 1.016007  |
| C | 2.590357  | -0.634248 | 0.104181  |
| H | 2.507317  | -1.690089 | -0.140927 |
| H | 3.362832  | -0.179286 | -0.517060 |
| H | 2.881867  | -0.535955 | 1.156490  |
| H | -4.010881 | -0.569006 | 0.068281  |

#### E-1ae

SCF = -301.302755852  
 Num. Imaginary Freq = 0

|   |           |           |           |
|---|-----------|-----------|-----------|
| C | -0.654504 | 0.034549  | 0.000016  |
| N | 0.514133  | 0.473589  | 0.000022  |
| C | -1.931497 | 0.048828  | 0.000006  |
| N | -3.132216 | -0.207046 | 0.000134  |
| H | -3.740805 | 0.609048  | -0.000290 |
| O | 1.468582  | -0.510311 | -0.000053 |
| C | 2.760520  | 0.080244  | -0.000056 |
| H | 3.459299  | -0.753412 | -0.000119 |
| H | 2.906134  | 0.689711  | -0.893505 |

H 2.906180 0.689615 0.893451

**E-1af**

SCF = -624.323382904

Num. Imaginary Freq = 0

C -0.800369 -0.492631 0.000004  
N 0.279770 -1.109972 -0.000213  
C -2.012663 -0.105212 0.000178  
N -3.092067 0.498864 0.000166  
H -3.901340 -0.121545 0.000150  
S 1.761423 -0.354251 -0.000105  
C 1.383721 1.398755 0.000073  
H 2.342068 1.918225 0.000148  
H 0.819250 1.671907 -0.891594  
H 0.819215 1.671714 0.891776

**E-1ag**

SCF = -523.909763854

Num. Imaginary Freq = 0

C -1.102646 -0.318642 -0.000149  
N 0.017919 -0.841739 -0.001372  
C -2.378391 -0.166308 0.000950  
N -3.511477 0.313275 -0.000248  
C 1.178819 0.003799 -0.000095  
H -4.253547 -0.387842 -0.002053  
F 0.918790 1.312255 0.000950  
F 1.902389 -0.269647 1.079928  
F 1.903461 -0.267721 -1.079860

**E-1ah**

SCF = -300.135488140

Num. Imaginary Freq = 0

C 0.526849 -0.191164 0.000009  
N -0.636162 -0.628246 -0.000006  
C 1.806463 -0.083628 0.000028  
N 2.964071 0.339663 0.000042  
C -1.675803 0.363512 -0.000027  
O -2.823644 0.059774 -0.000044  
H -1.318850 1.410200 -0.000027  
H 3.667593 -0.400620 0.000064

**E-1ai**

SCF = -279.028827517

Num. Imaginary Freq = 0

C -0.417081 0.162627 0.000014  
N 0.701964 0.709930 0.000049  
C -1.695435 0.043994 0.000011  
N -2.832420 -0.425687 -0.000017  
H -3.571535 0.278297 0.000037  
C 1.838127 -0.001239 -0.000009  
N 2.875866 -0.500042 -0.000051

**E-1aj**

SCF = -391.303616591

Num. Imaginary Freq = 0

C 0.777456 0.000914 0.253467  
N -0.298576 0.002437 0.866008  
C 2.045951 0.000473 0.043720  
N 3.163460 -0.001040 -0.452725  
H 3.934187 0.000902 0.214619  
N -1.479331 -0.000235 -0.024372  
O -1.909626 -1.082013 -0.293566  
O -1.912062 1.079845 -0.296449

**E-1ak**

SCF = -286.003303997

Num. Imaginary Freq = 0

C 0.030228 0.046547 -0.000004  
N 1.141003 0.596356 -0.000055  
C -1.255991 0.030058 -0.000011  
N -2.438246 -0.255515 -0.000133  
F 2.170456 -0.373736 0.000130  
H -3.098823 0.518103 0.000227

**E-1al**

SCF = -646.387419669

Num. Imaginary Freq = 0

C 0.506129 0.275693 0.000016  
N -0.600115 0.824214 0.000005  
C 1.762804 0.034034 -0.000023  
N 2.900644 -0.419153 0.000016  
H 3.643248 0.279154 -0.000053  
Cl -1.962385 -0.292526 -0.000003

**E-1bb**

SCF = -265.431309122

Num. Imaginary Freq = 0

C 0.628510 -0.120871 0.000131  
N 1.758445 -0.614866 0.000125  
C -0.628511 0.120875 0.000121  
N -1.758447 0.614868 0.000065  
C -2.926145 -0.251497 -0.000180  
H -3.527226 -0.011995 -0.878804  
H -2.678491 -1.316076 0.000034  
H -3.527792 -0.011744 0.877981  
C 2.926147 0.251494 -0.000083  
H 3.527792 0.011703 0.878069  
H 3.527225 0.012023 -0.878718  
H 2.678496 1.316074 0.000173

**E-1bc**

SCF = -281.458879151

Num. Imaginary Freq = 0

C -0.606542 -0.179217 -0.004190  
N -1.757718 -0.610215 -0.007616  
C 0.645638 0.044759 -0.000943  
N 1.776015 0.579272 0.003363  
C -2.892042 0.297612 0.008728  
N 2.875438 -0.199445 -0.072135

|   |           |           |           |
|---|-----------|-----------|-----------|
| H | 3.697298  | 0.272846  | 0.262537  |
| H | 2.774797  | -1.165434 | 0.213276  |
| H | -2.604074 | 1.352079  | 0.025971  |
| H | -3.503938 | 0.101880  | -0.873208 |
| H | -3.502548 | 0.072416  | 0.884570  |

**E-1bd**

SCF = -360.081953564  
Num. Imaginary Freq = 0

|   |           |           |           |
|---|-----------|-----------|-----------|
| C | 1.540906  | 0.080213  | -0.014828 |
| N | 2.680518  | 0.546553  | 0.024807  |
| C | 0.303624  | -0.196300 | -0.050817 |
| N | -0.817181 | -0.767464 | -0.111692 |
| C | 3.836445  | -0.333054 | 0.050370  |
| N | -1.932694 | -0.043554 | -0.197957 |
| C | -1.876532 | 1.380044  | 0.028378  |
| H | -1.161064 | 1.835645  | -0.657508 |
| H | -2.862881 | 1.805020  | -0.147139 |
| H | -1.557583 | 1.610499  | 1.053617  |
| C | -3.142939 | -0.755671 | 0.139275  |
| H | -3.985164 | -0.324334 | -0.402538 |
| H | -3.021896 | -1.795493 | -0.154573 |
| H | -3.357269 | -0.714360 | 1.214513  |
| H | 4.469957  | -0.102348 | -0.807932 |
| H | 3.574725  | -1.394803 | 0.031890  |
| H | 4.417645  | -0.119954 | 0.949292  |

**E-1be**

SCF = -340.612452170  
Num. Imaginary Freq = 0

|   |           |           |           |
|---|-----------|-----------|-----------|
| C | 0.010789  | -0.073684 | -0.000014 |
| N | 1.144265  | 0.445845  | 0.000016  |
| C | -1.256583 | -0.217492 | -0.000022 |
| N | -2.427065 | -0.572182 | -0.000032 |
| O | 2.168380  | -0.475029 | -0.000021 |
| C | 3.413100  | 0.205323  | 0.000025  |
| H | 4.170598  | -0.575682 | -0.000013 |
| H | 3.516736  | 0.824516  | -0.893073 |
| H | 3.516724  | 0.824418  | 0.893191  |
| C | -3.519391 | 0.384524  | 0.000023  |
| H | -3.184483 | 1.424438  | 0.000071  |
| H | -4.137261 | 0.197480  | -0.879042 |
| H | -4.137247 | 0.197394  | 0.879081  |

**E-1bf**

SCF = -663.633291931  
Num. Imaginary Freq = 0

|   |           |           |           |
|---|-----------|-----------|-----------|
| C | 0.216902  | -0.475346 | -0.004546 |
| N | -0.850281 | -1.112016 | -0.000830 |
| C | 1.394063  | 0.004799  | -0.002713 |
| N | 2.456881  | 0.628235  | 0.000809  |
| S | -2.349792 | -0.379014 | 0.002004  |
| C | -2.000715 | 1.380063  | -0.000610 |
| H | -2.967994 | 1.882798  | 0.001365  |
| H | -1.439013 | 1.664916  | 0.889090  |
| H | -1.443700 | 1.663046  | -0.893852 |

|   |          |           |           |
|---|----------|-----------|-----------|
| C | 3.724188 | -0.083438 | 0.001996  |
| H | 3.611050 | -1.170624 | 0.002693  |
| H | 4.292187 | 0.226344  | -0.876660 |
| H | 4.291322 | 0.227743  | 0.880676  |

**E-1bg**

SCF = -563.222020688  
Num. Imaginary Freq = 0

|   |           |           |           |
|---|-----------|-----------|-----------|
| C | -1.797927 | -0.031153 | 0.000266  |
| N | -2.904997 | -0.562420 | -0.000112 |
| C | -0.548833 | 0.244420  | 0.000454  |
| N | 0.549316  | 0.815180  | 0.000231  |
| C | 1.743250  | 0.022614  | -0.000038 |
| C | -4.116066 | 0.238218  | -0.000194 |
| H | -3.928179 | 1.313808  | -0.003276 |
| H | -4.701955 | -0.042740 | -0.876259 |
| H | -4.698681 | -0.038023 | 0.879594  |
| F | 1.542271  | -1.297494 | 0.000136  |
| F | 2.458273  | 0.323842  | -1.079914 |
| F | 2.459017  | 0.323989  | 1.079354  |

**E-1bh**

SCF = -339.449644768  
Num. Imaginary Freq = 0

|   |           |           |           |
|---|-----------|-----------|-----------|
| C | 1.064790  | 0.027888  | 0.099640  |
| N | 2.166465  | 0.504682  | 0.368805  |
| C | -0.187389 | -0.232148 | 0.019389  |
| N | -1.291527 | -0.716576 | -0.232223 |
| C | 3.374733  | -0.057836 | -0.207823 |
| H | 3.188951  | -0.908707 | -0.866945 |
| H | 3.884318  | 0.735251  | -0.756791 |
| H | 4.030623  | -0.355507 | 0.611465  |
| C | -2.518853 | -0.218341 | 0.238655  |
| O | -3.085564 | 0.719050  | -0.234187 |
| H | -2.943624 | -0.857555 | 1.030520  |

**E-1bi**

SCF = -318.341580804  
Num. Imaginary Freq = 0

|   |           |           |           |
|---|-----------|-----------|-----------|
| C | 0.268057  | 0.117296  | -0.000007 |
| N | 1.366329  | 0.707661  | -0.000023 |
| C | -0.989567 | -0.110361 | -0.000002 |
| N | -2.103469 | -0.627460 | 0.000010  |
| C | 2.527154  | 0.037188  | 0.000003  |
| N | 3.581936  | -0.425130 | 0.000021  |
| C | -3.307711 | 0.180948  | -0.000001 |
| H | -3.893664 | -0.095573 | -0.877573 |
| H | -3.893660 | -0.095542 | 0.877583  |
| H | -3.113845 | 1.255188  | -0.000021 |

**E-1bj**

SCF = -430.616012514  
Num. Imaginary Freq = 0

|   |           |          |          |
|---|-----------|----------|----------|
| C | -0.162918 | 0.000006 | 0.222128 |
| N | 0.898780  | 0.000003 | 0.860333 |

C -1.406578 0.000005 -0.086424  
N -2.503703 0.000005 -0.619524  
N 2.098787 -0.000002 -0.001201  
O 2.539323 1.080434 -0.263267  
O 2.539316 -1.080441 -0.263266  
C -3.741819 -0.000006 0.137448  
H -4.314422 -0.878515 -0.160992  
H -3.589408 -0.000002 1.218072  
H -4.314439 0.878491 -0.160995

**E-1bk**

SCF = -325.314827229  
Num. Imaginary Freq = 0

C -0.699847 0.004661 0.000022  
N -1.765408 0.634735 -0.000007  
C 0.570688 -0.182724 0.000025  
N 1.716035 -0.577813 -0.000024  
F -2.868106 -0.266146 -0.000009  
C 2.887567 0.277014 -0.000009  
H 3.482639 0.031691 0.879517  
H 3.483052 0.031258 -0.879127  
H 2.642429 1.340204 -0.000326

**E-1bl**

SCF = -685.699121462  
Num. Imaginary Freq = 0

C 0.128620 0.252449 0.000053  
N 1.216204 0.835058 0.000119  
C -1.092916 -0.122288 0.000007  
N -2.204542 -0.625348 -0.000071  
Cl 2.616035 -0.251491 -0.000053  
C -3.421240 0.167491 0.000017  
H -4.003216 -0.110755 -0.879013  
H -4.003244 -0.111000 0.878951  
H -3.234551 1.243227 0.000171

**E-1cc**

SCF = -297.481118718  
Num. Imaginary Freq = 0

C -0.617400 0.137143 -0.003865  
N -1.775140 0.590805 -0.014230  
C 0.617303 -0.136551 0.003025  
N 1.774876 -0.590717 0.014010  
N -2.835569 -0.262641 0.095252  
H -2.666590 -1.205693 -0.233209  
H -3.664257 0.157043 -0.292265  
N 2.835875 0.262282 -0.094649  
H 3.663912 -0.158196 0.293446  
H 2.667213 1.205185 0.234387

**E-1cd**

SCF = -376.103083419  
Num. Imaginary Freq = 0

C 1.539715 0.030325 -0.018270  
N 2.678758 0.527748 0.025102

C 0.315946 -0.282338 -0.062111  
N -0.821314 -0.797432 -0.130018  
N -1.923241 -0.029479 -0.259721  
C -1.807267 1.381697 0.024303  
H -1.048122 1.827730 -0.618709  
H -2.764372 1.860646 -0.174421  
H -1.521850 1.563076 1.070281  
C -3.128847 -0.694643 0.181646  
H -3.994006 -0.208961 -0.269815  
H -3.091313 -1.731759 -0.143625  
H -3.239672 -0.670599 1.273955  
N 3.768090 -0.297959 0.156038  
H 4.587792 0.159012 -0.209615  
H 3.638204 -1.229530 -0.221255

**E-1ce**

SCF = -356.634852398  
Num. Imaginary Freq = 0

C 0.015094 0.060924 0.005536  
N -1.147196 0.505505 0.009972  
C 1.259625 -0.162445 0.001965  
N 2.433805 -0.561756 -0.005568  
O -2.115399 -0.483853 -0.013797  
C -3.396016 0.120671 -0.000750  
H -4.106254 -0.703673 -0.021404  
H -3.538885 0.711480 0.906551  
H -3.536854 0.754579 -0.878847  
N 3.462861 0.316560 0.079327  
H 4.312588 -0.085608 -0.278566  
H 3.274091 1.256981 -0.243981

**E-1cf**

SCF = -679.658412321  
Num. Imaginary Freq = 0

C 0.230927 -0.520515 -0.005488  
N -0.851399 -1.121826 -0.004178  
C 1.405970 -0.051878 -0.003647  
N 2.469502 0.600779 -0.002328  
S -2.339246 -0.356176 0.003216  
C -1.949260 1.395421 0.004195  
H -2.906318 1.917694 0.007146  
H -1.383940 1.669116 0.894999  
H -1.388662 1.670468 -0.889198  
N 3.654948 -0.050635 -0.072667  
H 4.409069 0.517040 0.274440  
H 3.660602 -1.011899 0.245012

**E-1cg**

SCF = -579.252868505  
Num. Imaginary Freq = 0

C -0.565517 0.342705 0.006083  
N 0.564885 0.847939 0.010530  
C -1.792916 0.049703 0.001248  
N -2.905765 -0.529286 -0.003872  
C 1.714941 0.016036 -0.000389  
F 1.458047 -1.298785 -0.012740

F 2.455978 0.266885 1.078545  
F 2.450514 0.288000 -1.078253  
N -4.023423 0.170700 0.040764  
H -4.859999 -0.349877 -0.146584  
H -4.009787 1.168840 -0.114984

**E-1ch**

SCF = -355.480098802  
Num. Imaginary Freq = 0

C -0.183150 -0.340184 -0.013392  
N -1.309812 -0.821463 -0.154080  
C 1.046670 -0.049458 0.050544  
N 2.139439 0.522083 0.286406  
N 3.268227 0.013914 -0.181759  
H 4.102595 0.407358 0.212285  
H 3.288135 -0.930469 -0.540765  
C -2.502754 -0.188436 0.221560  
O -2.893643 0.849387 -0.224617  
H -3.091167 -0.805258 0.919169

**E-1ci**

SCF = -334.374442581  
Num. Imaginary Freq = 0

C -0.234817 0.237142 -0.000311  
N -1.374462 0.744458 0.000049  
C 0.991463 -0.033861 -0.000624  
N 2.114042 -0.605342 -0.000110  
C -2.489900 0.012795 0.000116  
N -3.511607 -0.520560 0.000223  
N 3.216867 0.097706 0.000432  
H 4.076430 -0.417690 0.000486  
H 3.209215 1.107390 0.000276

**E-1cj**

SCF = -446.644102503  
Num. Imaginary Freq = 0

C -0.178782 -0.355545 -0.097449  
N 0.941905 -0.878950 -0.247468  
C -1.383604 -0.010184 0.017426  
N -2.504756 0.515710 0.181867  
N 2.048168 0.066270 -0.007042  
O 3.074894 -0.467573 0.295820  
O 1.845366 1.240997 -0.166026  
N -3.616301 -0.169705 0.037839  
H -4.461476 0.369709 0.049347  
H -3.609387 -1.096007 -0.363936

**E-1ck**

SCF = -341.337168625  
Num. Imaginary Freq = 0

C 0.660718 0.148026 -0.005589  
N 1.793064 0.654764 -0.007719  
C -0.575167 -0.129064 -0.002350  
N -1.730460 -0.566112 0.004295  
N -2.804168 0.230252 -0.067796

F 2.779457 -0.367987 0.010724  
H -2.693159 1.195017 0.213029  
H -3.644307 -0.229231 0.236628

**E-1cl**

SCF = -701.724575896  
Num. Imaginary Freq = 0

C 0.113426 0.297057 -0.005975  
N 1.223543 0.844689 -0.006812  
C -1.097943 -0.068080 -0.002705  
N -2.221114 -0.600341 0.001316  
N -3.337888 0.129582 -0.060447  
Cl 2.570573 -0.277563 0.005378  
H -3.287745 1.105484 0.199020  
H -4.156687 -0.378297 0.223253

**E-1dd**

SCF = -454.724535881  
Num. Imaginary Freq = 0

C 0.606760 0.175880 -0.149151  
N 1.723688 0.736107 -0.170857  
C -0.606760 -0.175741 -0.149176  
N -1.723640 -0.736061 -0.170841  
N 2.865232 0.005532 -0.243316  
N -2.865237 -0.005576 -0.243310  
C -2.784067 1.400235 0.077496  
H -2.464898 1.563783 1.117228  
H -2.066106 1.889539 -0.580934  
H -3.763413 1.852098 -0.071233  
C -4.008799 -0.721709 0.276386  
H -4.035546 -0.723211 1.374881  
H -4.922617 -0.258363 -0.095949  
H -3.962711 -1.750666 -0.073281  
C 4.008862 0.721625 0.276286  
H 4.035634 0.723225 1.374781  
H 4.922636 0.258175 -0.096027  
H 3.962845 1.750554 -0.073472  
C 2.783972 -1.400245 0.077617  
H 2.464852 -1.563679 1.117382  
H 2.065935 -1.889551 -0.580729  
H 3.763275 -1.852195 -0.071130

**E-1de**

SCF = -435.257645218  
Num. Imaginary Freq = 0

C 0.945976 -0.058536 -0.040104  
N 2.088940 0.435312 -0.010655  
C -0.285495 -0.335912 -0.069117  
N -1.442182 -0.802203 -0.119196  
O 3.097400 -0.521409 0.031576  
C 4.350072 0.133908 0.059049  
H 5.094172 -0.659921 0.093136  
H 4.495210 0.739271 -0.838819  
H 4.441961 0.766078 0.945390  
N -2.514570 -0.008137 -0.227092  
C -3.750386 -0.637279 0.182777



|   |           |           |           |
|---|-----------|-----------|-----------|
| H | -4.588301 | -0.133388 | -0.298842 |
| H | -3.729416 | -1.677751 | -0.132361 |
| H | -3.891470 | -0.598820 | 1.270352  |
| C | -2.356551 | 1.404832  | 0.025728  |
| H | -1.598231 | 1.816938  | -0.640930 |
| H | -3.304282 | 1.905033  | -0.163723 |
| H | -2.045856 | 1.596950  | 1.061798  |

**E-1df**

SCF = -758.281365435  
 Num. Imaginary Freq = 0

|   |           |           |           |
|---|-----------|-----------|-----------|
| C | 0.677130  | 0.466207  | -0.030558 |
| N | 1.751800  | 1.082679  | 0.010319  |
| C | -0.490780 | -0.013129 | -0.065988 |
| N | -1.545130 | -0.693756 | -0.126310 |
| S | 3.248991  | 0.327076  | 0.042339  |
| C | 2.874500  | -1.427776 | 0.003087  |
| H | 3.835744  | -1.942064 | 0.023874  |
| H | 2.287244  | -1.722031 | 0.872957  |
| H | 2.340963  | -1.693558 | -0.909515 |
| N | -2.737435 | -0.095184 | -0.215691 |
| C | -3.851654 | -0.936148 | 0.157207  |
| H | -4.754576 | -0.586896 | -0.343934 |
| H | -3.636452 | -1.953662 | -0.160219 |
| H | -4.025272 | -0.932479 | 1.240802  |
| C | -2.833020 | 1.322067  | 0.039290  |
| H | -2.165498 | 1.864639  | -0.631120 |
| H | -3.856958 | 1.644380  | -0.139477 |
| H | -2.550753 | 1.564959  | 1.072749  |

**E-1dg**

SCF = -657.879292636  
 Num. Imaginary Freq = 0

|   |           |           |           |
|---|-----------|-----------|-----------|
| C | 0.317132  | 0.250321  | 0.000213  |
| N | 1.436082  | 0.791837  | 0.000160  |
| C | -0.888756 | -0.099565 | 0.000353  |
| N | -1.997050 | -0.715634 | 0.000293  |
| C | 2.605233  | -0.000017 | -0.000014 |
| F | 2.393698  | -1.325703 | 0.003642  |
| F | 3.345202  | 0.282272  | 1.075956  |
| F | 3.341449  | 0.276905  | -1.080047 |
| N | -3.116453 | -0.049370 | 0.000346  |
| C | -3.126130 | 1.393680  | -0.000056 |
| H | -2.609445 | 1.776112  | -0.885285 |
| H | -4.156069 | 1.741920  | 0.001171  |
| H | -2.607244 | 1.776480  | 0.883701  |
| C | -4.346828 | -0.805941 | -0.000392 |
| H | -4.939688 | -0.575576 | -0.888886 |
| H | -4.092581 | -1.862159 | -0.001022 |
| H | -4.940074 | -0.576738 | 0.888152  |

**E-1dh**

SCF = -434.106724790  
 Num. Imaginary Freq = 0

|   |          |          |          |
|---|----------|----------|----------|
| C | 1.073895 | 0.080975 | 0.000100 |
| N | 2.229863 | 0.557066 | 0.000081 |

|   |           |           |           |
|---|-----------|-----------|-----------|
| C | -0.139089 | -0.239117 | 0.000102  |
| N | -1.285950 | -0.787243 | 0.000087  |
| N | -2.357280 | -0.048126 | 0.000151  |
| C | -2.272582 | 1.393096  | -0.000057 |
| H | -1.730000 | 1.740100  | -0.884146 |
| H | -3.277669 | 1.807363  | -0.000284 |
| H | -1.730288 | 1.740387  | 0.884092  |
| C | -3.635792 | -0.720689 | -0.000144 |
| H | -4.211110 | -0.450961 | -0.888959 |
| H | -3.453057 | -1.791549 | 0.000403  |
| H | -4.211867 | -0.450173 | 0.887930  |
| C | 3.299506  | -0.359591 | -0.000025 |
| H | 3.000215  | -1.426478 | -0.000005 |
| O | 4.443963  | -0.018577 | -0.000140 |

**E-1di**

SCF = -413.002248044  
 Num. Imaginary Freq = 0

|   |           |           |           |
|---|-----------|-----------|-----------|
| C | 1.201159  | 0.145594  | -0.000004 |
| N | 2.333892  | 0.679899  | 0.000026  |
| C | -0.007262 | -0.174175 | 0.000020  |
| N | -1.130856 | -0.771472 | 0.000001  |
| C | 3.460370  | -0.030895 | 0.000020  |
| N | 4.491424  | -0.547710 | -0.000035 |
| N | -2.231771 | -0.084907 | -0.000004 |
| C | -3.478794 | -0.816356 | 0.000001  |
| H | -4.065057 | -0.570638 | -0.888269 |
| H | -3.247198 | -1.877587 | -0.000693 |
| H | -4.064544 | -0.571674 | 0.888905  |
| C | -2.215718 | 1.359569  | -0.000014 |
| H | -1.691602 | 1.730531  | -0.885307 |
| H | -3.239104 | 1.725888  | 0.001026  |
| H | -1.689839 | 1.730386  | 0.884284  |

**E-1dj**

SCF = -525.271668443  
 Num. Imaginary Freq = 0

|   |           |           |           |
|---|-----------|-----------|-----------|
| C | -0.737425 | 0.260066  | 0.000045  |
| N | -1.847736 | 0.841803  | 0.000126  |
| C | 0.448815  | -0.138837 | -0.000019 |
| N | 1.569215  | -0.725052 | -0.000046 |
| N | -2.973971 | -0.087214 | -0.000008 |
| O | -2.760974 | -1.274319 | 0.000234  |
| O | -4.043420 | 0.454881  | -0.000302 |
| N | 2.676923  | -0.049108 | 0.000133  |
| C | 3.917752  | -0.791378 | -0.000165 |
| H | 3.677584  | -1.850704 | -0.000728 |
| H | 4.505772  | -0.551071 | -0.888728 |
| H | 4.505699  | -0.552001 | 0.888700  |
| C | 2.668812  | 1.395260  | 0.000083  |
| H | 3.694043  | 1.756266  | 0.000035  |
| H | 2.146620  | 1.769622  | -0.885110 |
| H | 2.146708  | 1.769719  | 0.885279  |

**E-1dk**

SCF = -419.961621618  
 Num. Imaginary Freq = 0

|   |           |           |           |
|---|-----------|-----------|-----------|
| C | 1.573820  | 0.048459  | -0.012200 |
| N | 2.690530  | 0.592353  | 0.021960  |
| C | 0.353935  | -0.279848 | -0.044183 |
| N | -0.788716 | -0.772259 | -0.095607 |
| N | -1.882958 | -0.036387 | -0.183053 |
| C | -1.793314 | 1.390286  | 0.023869  |
| H | -1.068798 | 1.818579  | -0.670618 |
| H | -2.768419 | 1.835918  | -0.159402 |
| H | -1.472703 | 1.624912  | 1.046627  |
| C | -3.117604 | -0.724010 | 0.125192  |
| H | -3.933871 | -0.271163 | -0.437235 |
| H | -3.013944 | -1.765476 | -0.168219 |
| H | -3.353166 | -0.675931 | 1.194333  |
| F | 3.708653  | -0.406901 | 0.048372  |

#### E-1dl

SCF = -780.349353077

Num. Imaginary Freq = 0

|    |           |           |           |
|----|-----------|-----------|-----------|
| C  | 1.048279  | 0.215211  | -0.016891 |
| N  | 2.147316  | 0.790393  | 0.013795  |
| C  | -0.148124 | -0.184071 | -0.042835 |
| N  | -1.263502 | -0.755613 | -0.086379 |
| N  | -2.388238 | -0.073039 | -0.147789 |
| C  | -2.373660 | 1.359693  | 0.025659  |
| H  | -1.697549 | 1.813491  | -0.701342 |
| H  | -3.378733 | 1.745356  | -0.129245 |
| H  | -2.028979 | 1.632928  | 1.030427  |
| C  | -3.598486 | -0.821075 | 0.105802  |
| H  | -4.407614 | -0.430269 | -0.511711 |
| H  | -3.417965 | -1.861048 | -0.153360 |
| H  | -3.896048 | -0.761993 | 1.158501  |
| Cl | 3.517048  | -0.311129 | 0.024643  |

#### E-1ee

SCF = -415.787002817

Num. Imaginary Freq = 0

|   |           |           |           |
|---|-----------|-----------|-----------|
| C | 0.625194  | 0.093709  | -0.000048 |
| N | 1.797598  | 0.502936  | -0.000031 |
| C | -0.625194 | -0.093737 | -0.000046 |
| N | -1.797605 | -0.502945 | -0.000009 |
| O | -2.742099 | 0.496503  | -0.000002 |
| O | 2.742106  | -0.496500 | 0.000023  |
| C | -4.037868 | -0.082765 | 0.000036  |
| H | -4.728328 | 0.757968  | 0.000046  |
| H | -4.189783 | -0.690958 | -0.893454 |
| H | -4.189737 | -0.690941 | 0.893545  |
| C | 4.037867  | 0.082787  | 0.000035  |
| H | 4.189729  | 0.691006  | 0.893516  |
| H | 4.728339  | -0.757937 | 0.000083  |
| H | 4.189775  | 0.690940  | -0.893484 |

#### E-1ef

SCF = -738.810664985

Num. Imaginary Freq = 0

|   |          |           |          |
|---|----------|-----------|----------|
| C | 1.079238 | -0.013714 | 0.000014 |
|---|----------|-----------|----------|

|   |           |           |           |
|---|-----------|-----------|-----------|
| N | 2.243417  | -0.459779 | 0.000061  |
| C | -0.176654 | 0.153753  | -0.000026 |
| N | -1.359672 | 0.502431  | -0.000067 |
| O | 3.208772  | 0.522992  | 0.000081  |
| C | 4.492515  | -0.080203 | 0.000115  |
| H | 5.200662  | 0.745824  | 0.000119  |
| H | 4.633374  | -0.691894 | 0.893253  |
| H | 4.633411  | -0.691916 | -0.893003 |
| S | -2.620486 | -0.609471 | -0.000025 |
| C | -3.988768 | 0.546449  | -0.000125 |
| H | -4.894100 | -0.061644 | -0.000112 |
| H | -3.970000 | 1.165533  | 0.894498  |
| H | -3.969957 | 1.165430  | -0.894818 |

#### E-1eg

SCF = -638.402441490

Num. Imaginary Freq = 0

|   |           |           |           |
|---|-----------|-----------|-----------|
| C | -1.237451 | -0.194004 | 0.000096  |
| N | -2.348999 | 0.373408  | 0.000066  |
| C | 0.008929  | -0.424478 | 0.000165  |
| N | 1.157523  | -0.867851 | 0.000248  |
| O | -3.406369 | -0.476387 | -0.000074 |
| C | -4.623915 | 0.264258  | -0.000097 |
| H | -5.412659 | -0.484008 | -0.000222 |
| H | -4.692703 | 0.884334  | 0.894243  |
| H | -4.692573 | 0.884496  | -0.894334 |
| C | 2.274694  | 0.018746  | -0.000012 |
| F | 1.952517  | 1.316566  | -0.001009 |
| F | 3.015392  | -0.213082 | 1.079151  |
| F | 3.016056  | -0.214570 | -1.078388 |

#### E-1eh

SCF = -414.630923143

Num. Imaginary Freq = 0

|   |           |           |           |
|---|-----------|-----------|-----------|
| C | -0.445891 | -0.184978 | 0.002102  |
| N | -1.553233 | 0.331218  | -0.255702 |
| C | 0.811226  | -0.376193 | 0.034406  |
| N | 1.968189  | -0.750937 | 0.170570  |
| O | -2.612504 | -0.343109 | 0.271016  |
| C | -3.824052 | 0.322613  | -0.067885 |
| H | -4.614327 | -0.273471 | 0.382178  |
| H | -3.834298 | 1.332328  | 0.344402  |
| H | -3.951169 | 0.358935  | -1.150587 |
| C | 3.126926  | -0.098674 | -0.284595 |
| H | 3.597202  | -0.638478 | -1.121785 |
| O | 3.598586  | 0.865872  | 0.233678  |

#### E-1ei

SCF = -393.522436925

Num. Imaginary Freq = 0

|   |           |           |           |
|---|-----------|-----------|-----------|
| C | 0.357522  | -0.104254 | 0.000148  |
| N | 1.483154  | 0.441937  | 0.000202  |
| C | -0.890674 | -0.295505 | 0.000111  |
| N | -2.051589 | -0.730225 | 0.000027  |
| O | 2.519037  | -0.423873 | -0.000081 |
| C | 3.755159  | 0.289801  | -0.000064 |

H 4.525669 -0.476838 -0.000200  
H 3.835557 0.907518 -0.894605  
H 3.835653 0.907299 0.894619  
C -3.133230 0.052249 -0.000106  
N -4.128971 0.631039 -0.000187

**E-1ej**

SCF = -505.790671097  
Num. Imaginary Freq = 0

C -0.957248 -0.319146 0.001383  
N -1.958014 -1.064678 0.003995  
C 0.211248 0.171097 -0.000343  
N 1.244446 0.848503 -0.002806  
O -3.185698 -0.522788 0.002032  
C -3.249679 0.900314 -0.003322  
H -4.310106 1.135498 -0.004782  
H -2.768322 1.307433 0.889449  
H -2.767516 1.300664 -0.898742  
N 2.481314 0.055675 -0.000348  
O 2.932137 -0.189585 -1.079750  
O 2.934285 -0.179337 1.080452

**E-1ek**

SCF = -400.486207682  
Num. Imaginary Freq = 0

C -0.049592 -0.044815 -0.000006  
N 1.111797 -0.471838 -0.000014  
C -1.297595 0.171598 -0.000001  
N -2.452152 0.621349 0.000001  
O 2.085395 0.477698 0.000008  
C 3.366001 -0.147306 -0.000006  
H 4.080038 0.672663 0.000012  
H 3.493029 -0.757793 0.894629  
H 3.493028 -0.757754 -0.894668  
F -3.386627 -0.433571 0.000015

**E-1el**

SCF = -760.874663417  
Num. Imaginary Freq = 0

C 0.000000 0.492684 0.000000  
N 0.646908 1.552947 0.000000  
C -0.439134 -0.695845 0.000000  
N -1.055550 -1.765177 0.000000  
O -0.112604 2.684484 0.000000  
C 0.733088 3.830045 0.000000  
H 1.357329 3.844878 -0.894299  
H 0.057610 4.682269 0.000000  
H 1.357329 3.844878 0.894299  
Cl -0.045568 -3.183741 0.000000

**E-1ff**

SCF = -1061.83441433  
Num. Imaginary Freq = 0

C 0.543763 0.323310 0.000117  
N 1.539835 1.064462 0.000036

C -0.543798 -0.323683 0.000117  
N -1.540023 -1.064631 0.000027  
S -3.110693 -0.500075 -0.000127  
S 3.110616 0.500223 -0.000118  
C -2.955170 1.286799 0.000097  
H -3.972290 1.679171 -0.000029  
H -2.432198 1.631595 0.892163  
H -2.431902 1.631791 -0.891720  
C 2.955452 -1.286682 0.000105  
H 2.432247 -1.631779 -0.891707  
H 3.972651 -1.678848 -0.000028  
H 2.432557 -1.631587 0.892174

**E-1fg**

SCF = -961.425042163  
Num. Imaginary Freq = 0

C 0.953937 -0.408189 0.000749  
N 2.012216 -1.059402 0.000161  
C -0.215804 0.076021 0.000187  
N -1.261835 0.740007 0.000279  
S 3.517896 -0.383596 -0.000283  
C 3.229490 1.385920 0.000061  
H 4.212993 1.855646 -0.001754  
H 2.678745 1.685457 -0.891680  
H 2.681879 1.685714 0.893641  
C -2.521127 0.068914 -0.000057  
F -2.445971 -1.265910 -0.000711  
F -3.209875 0.433025 1.079093  
F -3.209889 0.434051 -1.078872

**E-1fh**

SCF = -737.651752208  
Num. Imaginary Freq = 0

C -0.226969 -0.508929 0.000325  
N -1.319664 -1.105887 -0.000257  
C 0.945018 -0.032345 -0.000079  
N 2.036716 0.566601 0.000031  
S -2.784559 -0.346849 -0.000464  
C -2.400029 1.403349 -0.000023  
H -3.356390 1.926164 -0.000110  
H -1.834942 1.672644 0.892445  
H -1.834569 1.673018 -0.892138  
C 3.205811 -0.249911 0.000178  
H 3.009952 -1.339356 0.000026  
O 4.300817 0.214891 0.000797

**E-1fi**

SCF = -716.545589566  
Num. Imaginary Freq = 0

C 0.095834 -0.449106 -0.001025  
N 1.162087 -1.093184 -0.000229  
C -1.078967 0.009097 -0.000707  
N -2.129915 0.683370 -0.000128  
S 2.657958 -0.414819 0.000463  
C 2.368751 1.353945 0.000012  
H 3.351687 1.824734 0.000363

|   |           |           |           |
|---|-----------|-----------|-----------|
| H | 1.819655  | 1.651923  | -0.893324 |
| H | 1.818858  | 1.652277  | 0.892738  |
| C | -3.340914 | 0.117269  | 0.000248  |
| N | -4.430136 | -0.258624 | 0.000592  |

**E-1fj**

SCF = -828.817343774  
 Num. Imaginary Freq = 0

|   |           |           |           |
|---|-----------|-----------|-----------|
| C | 0.522980  | -0.413474 | -0.001816 |
| N | 1.567238  | -1.073901 | -0.005148 |
| C | -0.625882 | 0.121219  | 0.000649  |
| N | -1.644842 | 0.829540  | 0.003844  |
| S | 3.093767  | -0.449484 | -0.002584 |
| C | 2.857774  | 1.327648  | 0.006206  |
| H | 3.855705  | 1.766077  | 0.009406  |
| H | 2.321037  | 1.649240  | -0.886326 |
| H | 2.319413  | 1.640067  | 0.901024  |
| N | -2.896746 | 0.058821  | 0.000469  |
| O | -3.353858 | -0.183302 | 1.079432  |
| O | -3.359293 | -0.163850 | -1.080326 |

**E-1fk**

SCF = -723.513386891  
 Num. Imaginary Freq = 0

|   |           |           |           |
|---|-----------|-----------|-----------|
| C | -0.270889 | -0.504991 | -0.000053 |
| N | 0.808828  | -1.086493 | -0.000012 |
| C | -1.449210 | -0.028775 | -0.000050 |
| N | -2.466861 | 0.679279  | 0.000016  |
| F | -3.630128 | -0.137605 | 0.000029  |
| S | 2.309596  | -0.385539 | 0.000025  |
| C | 1.974938  | 1.376754  | -0.000011 |
| H | 2.948718  | 1.866911  | 0.000121  |
| H | 1.423158  | 1.666408  | -0.894094 |
| H | 1.422943  | 1.666322  | 0.893970  |

**E-1fl**

SCF = -1083.89807724  
 Num. Imaginary Freq = 0

|    |           |           |           |
|----|-----------|-----------|-----------|
| C  | 0.050805  | -0.019166 | 0.000098  |
| N  | 1.201798  | 0.421083  | 0.000092  |
| C  | -1.182766 | -0.320780 | 0.000117  |
| N  | -2.318405 | -0.810213 | 0.000199  |
| S  | 2.557161  | -0.557059 | -0.000024 |
| C  | 3.814152  | 0.718956  | 0.000027  |
| H  | 4.769839  | 0.193526  | -0.000031 |
| H  | 3.739078  | 1.332285  | -0.895292 |
| H  | 3.739124  | 1.332171  | 0.895428  |
| Cl | -3.614089 | 0.382636  | -0.000189 |

**E-1gg**

SCF = -861.006760060  
 Num. Imaginary Freq = 0

|   |           |           |           |
|---|-----------|-----------|-----------|
| C | -0.618267 | -0.163504 | -0.000487 |
| N | -1.692476 | -0.765675 | -0.000528 |
| C | 0.618267  | 0.163503  | -0.000467 |

|   |           |           |           |
|---|-----------|-----------|-----------|
| N | 1.692476  | 0.765675  | -0.000495 |
| C | 2.922644  | 0.014801  | 0.000118  |
| C | -2.922644 | -0.014801 | 0.000004  |
| F | -3.615920 | -0.345949 | -1.080147 |
| F | -2.760463 | 1.307605  | 0.000597  |
| F | -3.615651 | -0.346971 | 1.080015  |
| F | 3.615964  | 0.345906  | -1.080017 |
| F | 3.615607  | 0.347015  | 1.080144  |
| F | 2.760464  | -1.307605 | 0.000759  |

**E-1gh**

SCF = -637.236006537  
 Num. Imaginary Freq = 0

|   |           |           |           |
|---|-----------|-----------|-----------|
| C | 0.159740  | -0.037570 | -0.210185 |
| N | -0.913314 | -0.472839 | -0.636507 |
| C | 1.406619  | 0.205836  | -0.039132 |
| N | 2.494775  | 0.624333  | 0.338732  |
| C | -2.138306 | -0.054406 | -0.007474 |
| C | 3.746979  | 0.244590  | -0.198563 |
| O | 4.314126  | -0.756406 | 0.103719  |
| H | 4.164603  | 1.029857  | -0.848797 |
| F | -2.896206 | 0.542705  | -0.918175 |
| F | -1.977791 | 0.788417  | 1.013059  |
| F | -2.770230 | -1.129985 | 0.442404  |

**E-1gi**

SCF = -616.124750066  
 Num. Imaginary Freq = 0

|   |           |           |           |
|---|-----------|-----------|-----------|
| C | -1.489569 | 0.040484  | 0.000014  |
| N | -2.569353 | 0.651348  | -0.000055 |
| C | -0.243610 | -0.238883 | 0.000057  |
| N | 0.845003  | -0.814230 | 0.000124  |
| C | -3.753357 | 0.025084  | -0.000034 |
| N | -4.823040 | -0.400549 | -0.000024 |
| C | 2.058825  | -0.035871 | 0.000010  |
| F | 1.863625  | 1.281731  | -0.000265 |
| F | 2.756926  | -0.351807 | 1.080124  |
| F | 2.757004  | -0.352243 | -1.079925 |

**E-1gj**

SCF = -728.398670046  
 Num. Imaginary Freq = 0

|   |           |           |           |
|---|-----------|-----------|-----------|
| C | -1.029678 | 0.000165  | 0.184328  |
| N | -2.080986 | 0.001330  | 0.831248  |
| C | 0.191475  | -0.000327 | -0.191161 |
| N | 1.263494  | -0.001392 | -0.784698 |
| N | -3.298966 | -0.000085 | -0.018020 |
| O | -3.732886 | -1.082220 | -0.269466 |
| O | -3.734154 | 1.081228  | -0.270801 |
| C | 2.503166  | -0.000047 | -0.049827 |
| F | 2.349241  | 0.001899  | 1.273027  |
| F | 3.189661  | 1.079297  | -0.390197 |
| F | 3.190182  | -1.080061 | -0.387009 |

**E-1gk**

SCF = -623.098092086

Num. Imaginary Freq = 0

|   |           |           |           |
|---|-----------|-----------|-----------|
| C | 1.830694  | -0.057027 | 0.000014  |
| N | 2.883461  | 0.596741  | 0.000009  |
| C | 0.588487  | -0.346528 | 0.000019  |
| N | -0.531473 | -0.831492 | 0.000047  |
| F | 3.994905  | -0.254994 | -0.000016 |
| C | -1.709075 | -0.009766 | -0.000001 |
| F | -1.452676 | 1.297805  | -0.000030 |
| F | -2.422502 | -0.292312 | 1.079083  |
| F | -2.422455 | -0.292368 | -1.079101 |

**E-1gl**

SCF = -983.484058500

Num. Imaginary Freq = 0

|    |           |           |           |
|----|-----------|-----------|-----------|
| C  | 1.323238  | 0.136938  | 0.000046  |
| N  | 2.388444  | 0.760629  | 0.000060  |
| C  | 0.109778  | -0.250475 | 0.000042  |
| N  | -0.982841 | -0.809379 | -0.000114 |
| Cl | 3.818648  | -0.231193 | -0.000041 |
| C  | -2.195255 | -0.037795 | -0.000023 |
| F  | -2.003498 | 1.281603  | -0.000850 |
| F  | -2.896833 | -0.352450 | 1.079608  |
| F  | -2.897759 | -0.353650 | -1.078682 |

**E-1hh**

SCF = -413.464947850

Num. Imaginary Freq = 0

|   |           |           |           |
|---|-----------|-----------|-----------|
| C | 0.622891  | 0.150469  | -0.043984 |
| N | 1.697100  | 0.642630  | -0.378827 |
| C | -0.622851 | -0.150534 | 0.043762  |
| N | -1.697063 | -0.642632 | 0.378685  |
| C | 2.945437  | 0.340022  | 0.207158  |
| O | 3.583688  | -0.627876 | -0.064301 |
| H | 3.293791  | 1.152423  | 0.865271  |
| C | -2.945451 | -0.339951 | -0.207136 |
| O | -3.583736 | 0.627850  | 0.064592  |
| H | -3.293818 | -1.152228 | -0.865398 |

**E-1hi**

SCF = -392.354435972

Num. Imaginary Freq = 0

|   |           |           |           |
|---|-----------|-----------|-----------|
| C | -0.712161 | 0.008327  | 0.106201  |
| N | -1.782617 | 0.569182  | 0.399151  |
| C | 0.543029  | -0.240238 | 0.043467  |
| N | 1.638509  | -0.738648 | -0.186082 |
| C | -2.968941 | 0.102316  | -0.014020 |
| N | -4.039748 | -0.203588 | -0.306227 |
| C | 2.883371  | -0.209069 | 0.233602  |
| O | 3.439064  | 0.677877  | -0.330079 |
| H | 3.302689  | -0.779644 | 1.077246  |

**E-1hj**

SCF = -504.628861861

Num. Imaginary Freq = 0

|   |           |           |           |
|---|-----------|-----------|-----------|
| C | -0.252192 | -0.053036 | 0.195338  |
| N | -1.290768 | 0.144112  | 0.836760  |
| C | 0.985613  | -0.200814 | -0.104817 |
| N | 2.068884  | -0.395261 | -0.627558 |
| N | -2.517920 | 0.060610  | 0.009653  |
| O | -3.016601 | -1.023041 | -0.045031 |
| O | -2.901094 | 1.102228  | -0.429035 |
| C | 3.337885  | -0.328271 | 0.001058  |
| O | 3.918901  | 0.690653  | 0.188317  |
| H | 3.741141  | -1.332215 | 0.204535  |

**E-1hk**

SCF = -399.328705566

Num. Imaginary Freq = 0

|   |           |           |           |
|---|-----------|-----------|-----------|
| C | -1.131976 | -0.048894 | 0.021082  |
| N | -2.164519 | 0.546114  | 0.362052  |
| C | 0.123960  | -0.297963 | -0.033468 |
| N | 1.251227  | -0.709027 | -0.204853 |
| F | -3.297176 | -0.065449 | -0.206236 |
| C | 2.473358  | -0.183622 | 0.278772  |
| H | 2.846659  | -0.756890 | 1.140654  |
| O | 3.053615  | 0.708649  | -0.247905 |

**E-1hl**

SCF = -759.713663248

Num. Imaginary Freq = 0

|    |           |           |           |
|----|-----------|-----------|-----------|
| C  | -0.554612 | 0.119057  | 0.162622  |
| N  | -1.615993 | 0.699496  | 0.409348  |
| C  | 0.663665  | -0.246300 | 0.054880  |
| N  | 1.763082  | -0.745886 | -0.120964 |
| Cl | -3.048528 | -0.122606 | -0.171945 |
| C  | 3.012573  | -0.198696 | 0.251460  |
| H  | 3.426519  | -0.701040 | 1.139623  |
| O  | 3.579886  | 0.633212  | -0.381129 |

**E-1ii**

SCF = -371.242742022

Num. Imaginary Freq = 0

|   |           |           |           |
|---|-----------|-----------|-----------|
| C | -0.623904 | 0.126350  | -0.000038 |
| N | -1.715743 | 0.715961  | -0.000070 |
| C | 0.623904  | -0.126347 | -0.000014 |
| N | 1.715742  | -0.715960 | 0.000001  |
| C | -2.888111 | 0.071873  | -0.000048 |
| N | -3.950044 | -0.373135 | -0.000027 |
| C | 2.888111  | -0.071873 | 0.000065  |
| N | 3.950045  | 0.373132  | 0.000125  |

**E-1ij**

SCF = -483.516007604

Num. Imaginary Freq = 0

|   |           |           |           |
|---|-----------|-----------|-----------|
| C | 0.162583  | 0.000457  | 0.252983  |
| N | 1.226031  | 0.001497  | 0.881847  |
| C | -1.064100 | -0.000127 | -0.090876 |
| N | -2.140088 | -0.001229 | -0.695197 |
| N | 2.428633  | -0.000034 | 0.011450  |

O 2.856973 1.081561 -0.248685  
O 2.856048 -1.082510 -0.246448  
C -3.335627 -0.000109 -0.096451  
N -4.411906 0.000662 0.311490

**E-1ik**

SCF = -378.215665547  
Num. Imaginary Freq = 0

C -1.045518 0.034624 -0.000027  
N -2.113007 0.669309 -0.000080  
C 0.199258 -0.222115 -0.000005  
N 1.327285 -0.708088 0.000025  
F -3.203253 -0.197281 0.000051  
C 2.471678 -0.022030 0.000012  
N 3.510974 0.472015 0.000007

**E-1il**

SCF = -738.602233822  
Num. Imaginary Freq = 0

C -0.474557 0.199047 0.000020  
N -1.550321 0.809515 0.000037  
C 0.747049 -0.146687 0.000023  
N 1.846195 -0.712299 0.000027  
Cl -2.962237 -0.190795 -0.000054  
C 3.017680 -0.068514 0.000019  
N 4.077983 0.379988 0.000014

**E-1jj**

SCF = -595.788372565  
Num. Imaginary Freq = 0

C -0.596062 0.000179 0.226374  
N -1.643526 0.000196 0.871903  
C 0.596061 0.000182 -0.226364  
N 1.643521 0.000207 -0.871899  
N -2.870620 -0.000051 0.030790  
O -3.303018 -1.082124 -0.216667  
O -3.303223 1.081863 -0.216990  
N 2.870620 -0.000052 -0.030791  
O 3.303014 -1.082129 0.216656  
O 3.303232 1.081858 0.216990

**E-1jk**

SCF = -490.485719996  
Num. Imaginary Freq = 0

C 1.428941 -0.000145 -0.030257  
N 2.481092 0.002833 -0.682470  
C 0.217309 -0.001799 0.356662  
N -0.878740 -0.003743 0.908826  
F 3.590624 -0.000865 0.158715  
N -2.035166 0.000268 -0.020720  
O -2.448968 -1.080026 -0.304515  
O -2.446459 1.083019 -0.298774

**E-1jl**

SCF = -850.874137022

Num. Imaginary Freq = 0

C 0.901949 -0.000241 -0.160094  
N 1.956400 -0.001646 -0.796261  
C -0.291466 0.000536 0.282309  
N -1.362433 0.001836 0.890832  
Cl 3.400348 0.000390 0.152645  
N -2.555749 -0.000027 0.010612  
O -2.982993 -1.081913 -0.252578  
O -2.984050 1.080721 -0.255490

**E-1kk**

SCF = -385.179640748  
Num. Imaginary Freq = 0

C -0.618967 -0.137990 -0.000188  
N -1.748871 -0.640590 -0.000136  
C 0.618966 0.138026 -0.000126  
N 1.748887 0.640592 0.000094  
F 2.734775 -0.339457 0.000161  
F -2.734787 0.339431 0.000080

**E-1kl**

SCF = -745.570464925  
Num. Imaginary Freq = 0

C 1.139344 -0.077942 0.000015  
N 2.224713 -0.672684 0.000027  
C -0.081680 0.275816 0.000017  
N -1.187732 0.810209 0.000020  
F 3.289470 0.236567 -0.000032  
Cl -2.541770 -0.251707 -0.000014

**E-1ll**

SCF = -1105.95870893  
Num. Imaginary Freq = 0

C -0.598160 -0.216336 0.000057  
N -1.675035 -0.813974 0.000011  
C 0.598169 0.216491 0.000082  
N 1.675099 0.814028 0.000125  
Cl -3.085533 0.196730 -0.000027  
Cl 3.085504 -0.196807 -0.000078

**(Z)-1,4-Duazabutatrienes 1**

**Z-1aa**

SCF = -186.808172038  
Num. Imaginary Freq = 0

C -0.637944 0.004568 -0.000017  
N -1.869406 -0.115498 0.000000  
C 0.637909 0.004042 -0.000022  
N 1.869501 -0.115388 0.000029  
H 2.357298 0.782489 -0.000061  
H -2.357755 0.782057 0.000092

**Z-1ab**

SCF = -226.119871557  
Num. Imaginary Freq = 0

|   |           |           |           |
|---|-----------|-----------|-----------|
| C | -0.043821 | -0.322850 | -0.000113 |
| N | 1.151592  | -0.619607 | 0.000076  |
| C | -1.278406 | 0.003990  | -0.000169 |
| N | -2.513673 | 0.092611  | 0.000137  |
| H | -2.841881 | 1.059462  | -0.000009 |
| C | 2.163076  | 0.423706  | 0.000000  |
| H | 2.795597  | 0.283120  | -0.877790 |
| H | 1.741619  | 1.432814  | -0.001076 |
| H | 2.794135  | 0.284498  | 0.879077  |

#### Z-1ac

SCF = -242.148919007  
Num. Imaginary Freq = 0

|   |           |           |           |
|---|-----------|-----------|-----------|
| C | 0.021418  | -0.167259 | 0.004641  |
| N | -1.171117 | -0.550635 | 0.007690  |
| C | 1.282412  | -0.037348 | 0.001955  |
| N | 2.514557  | 0.044472  | 0.003349  |
| H | 2.869128  | 0.998619  | -0.019922 |
| N | -2.157810 | 0.352946  | -0.071526 |
| H | -3.046358 | -0.008856 | 0.226476  |
| H | -1.945168 | 1.310401  | 0.177280  |

#### Z-1ad

SCF = -320.772570670  
Num. Imaginary Freq = 0

|   |           |           |           |
|---|-----------|-----------|-----------|
| C | 0.898283  | -0.352509 | -0.024857 |
| N | -0.275800 | -0.816243 | -0.075709 |
| C | 2.148652  | -0.167508 | 0.011719  |
| N | 3.377914  | -0.026036 | 0.051628  |
| H | 3.683380  | 0.944647  | 0.062079  |
| N | -1.313051 | 0.000487  | -0.156024 |
| C | -2.602248 | -0.595216 | 0.104311  |
| H | -2.895900 | -0.484675 | 1.154676  |
| H | -3.361081 | -0.126145 | -0.523233 |
| H | -2.541719 | -1.653892 | -0.134766 |
| C | -1.135629 | 1.421905  | 0.004490  |
| H | -2.091302 | 1.917776  | -0.151883 |
| H | -0.757974 | 1.664298  | 1.005953  |
| H | -0.413185 | 1.790501  | -0.726071 |

#### Z-1ae

SCF = -301.302097384  
Num. Imaginary Freq = 0

|   |           |           |           |
|---|-----------|-----------|-----------|
| C | -0.656009 | -0.145753 | 0.000235  |
| N | 0.532587  | -0.522858 | 0.000181  |
| C | -1.921641 | -0.033907 | 0.000092  |
| N | -3.149133 | 0.023053  | -0.000275 |
| H | -3.530519 | 0.967379  | -0.000296 |
| O | 1.436683  | 0.509803  | 0.000293  |
| C | 2.756681  | -0.014876 | -0.000328 |
| H | 2.932837  | -0.615662 | -0.894099 |
| H | 3.412781  | 0.852787  | 0.000273  |
| H | 2.933073  | -0.617074 | 0.892438  |

#### Z-1af

SCF = -624.322063722  
Num. Imaginary Freq = 0

|   |           |           |           |
|---|-----------|-----------|-----------|
| C | -0.799694 | -0.597751 | -0.000058 |
| N | 0.316599  | -1.144133 | -0.000097 |
| C | -1.956783 | -0.073459 | -0.000175 |
| N | -3.144255 | 0.275455  | 0.000021  |
| H | -3.270864 | 1.287278  | 0.000141  |
| S | 1.758452  | -0.313179 | 0.000095  |
| C | 1.298244  | 1.419248  | 0.000035  |
| H | 0.723036  | 1.667386  | 0.892282  |
| H | 2.232207  | 1.981322  | 0.000213  |
| H | 0.723374  | 1.667392  | -0.892430 |

#### Z-1ag

SCF = -523.908955747  
Num. Imaginary Freq = 0

|   |           |           |           |
|---|-----------|-----------|-----------|
| C | -1.093197 | -0.479932 | -0.000116 |
| N | 0.063683  | -0.915563 | 0.000093  |
| C | -2.314591 | -0.117561 | 0.000044  |
| N | -3.525110 | 0.111035  | 0.000031  |
| H | -3.752651 | 1.106836  | -0.000159 |
| C | 1.160296  | 0.012862  | 0.000025  |
| F | 1.901640  | -0.203713 | -1.080060 |
| F | 1.901856  | -0.203887 | 1.079862  |
| F | 0.804015  | 1.300117  | 0.000152  |

#### Z-1ah

SCF = -300.136945591  
Num. Imaginary Freq = 0

|   |           |           |           |
|---|-----------|-----------|-----------|
| C | 0.472861  | -0.404839 | -0.118595 |
| N | -0.682082 | -0.819731 | -0.223252 |
| C | 1.670756  | 0.015449  | 0.004919  |
| N | 2.877968  | 0.273610  | 0.015750  |
| H | 3.105051  | 1.117630  | 0.544563  |
| C | -1.812529 | -0.157732 | 0.298306  |
| O | -2.273916 | 0.839120  | -0.165501 |
| H | -2.271451 | -0.725008 | 1.124186  |

#### Z-1ai

SCF = -279.027737676  
Num. Imaginary Freq = 0

|   |           |           |           |
|---|-----------|-----------|-----------|
| C | -0.423670 | -0.297564 | -0.000134 |
| N | 0.728457  | -0.771685 | 0.000121  |
| C | -1.657242 | 0.007860  | -0.000239 |
| N | -2.867525 | 0.237258  | 0.000164  |
| H | -3.099475 | 1.231926  | 0.000107  |
| C | 1.813391  | 0.017094  | 0.000017  |
| N | 2.811154  | 0.592103  | 0.000005  |

#### Z-1aj

SCF = -391.302844510  
Num. Imaginary Freq = 0

C -0.779639 -0.001020 0.420435  
N 0.341182 -0.002057 0.943608  
C -1.987832 -0.000231 0.010406  
N -3.176524 0.000415 -0.285026  
H -3.370531 0.002602 -1.286597  
N 1.448647 0.000198 -0.043632  
O 1.854302 1.081855 -0.348710  
O 1.855976 -1.079978 -0.351678

#### Z-1ak

SCF = -286.002613082  
Num. Imaginary Freq = 0

C -0.027303 -0.194906 0.000062  
N -1.189419 -0.617265 -0.000094  
C 1.239007 -0.028123 0.000112  
N 2.453919 0.062347 -0.000020  
H 2.838625 1.004858 -0.000358  
F -2.106706 0.468638 0.000013

#### Z-1al

SCF = -646.387078108  
Num. Imaginary Freq = 0

C -0.508839 0.415670 -0.000268  
N 0.634516 0.877558 0.000129  
C -1.718366 0.005998 -0.000049  
N -2.920131 -0.231324 0.000133  
H -3.164461 -1.221151 -0.000136  
Cl 1.913353 -0.343088 0.000012

#### Z-1bb

SCF = -265.430904481  
Num. Imaginary Freq = 0

C -0.637221 -0.458934 0.000079  
N -1.866154 -0.555569 0.000002  
C 0.637940 -0.461157 -0.000090  
N 1.866946 -0.555925 0.000020  
C -2.688817 0.642299 -0.000002  
H -3.335121 0.612544 -0.878647  
H -3.335424 0.612376 0.878399  
H -2.105013 1.567260 0.000144  
C 2.687881 0.643203 0.000012  
H 3.334140 0.614373 -0.878679  
H 2.102590 1.567218 0.000261  
H 3.334594 0.614220 0.878376

#### Z-1bc

SCF = -281.458605972  
Num. Imaginary Freq = 0

C 0.627321 -0.464501 0.006075  
N 1.849489 -0.569006 0.010317  
C -0.634750 -0.300446 0.003674  
N -1.871177 -0.492684 0.000052  
C 2.707804 0.601724 -0.005795  
H 3.351829 0.573407 0.874408

H 3.352613 0.548362 -0.884253  
H 2.146723 1.541126 -0.019911  
N -2.704835 0.563664 -0.075693  
H -3.629953 0.341284 0.248598  
H -2.337798 1.461344 0.214700

#### Z-1bd

SCF = -360.081520940  
Num. Imaginary Freq = 0

C 1.551909 -0.615390 0.000076  
N 2.780879 -0.613846 0.039500  
C 0.284006 -0.566174 -0.036555  
N -0.935966 -0.879762 -0.086464  
C 3.525279 0.632343 0.035914  
H 4.144107 0.674670 0.933909  
H 4.197669 0.637841 -0.823718  
H 2.879767 1.515765 -0.002058  
N -1.868978 0.063274 -0.193016  
C -3.205970 -0.365231 0.145556  
H -3.416354 -0.244652 1.215454  
H -3.933149 0.215925 -0.422390  
H -3.304128 -1.416242 -0.114885  
C -1.512564 1.448315 -0.011676  
H -2.391086 2.065474 -0.189244  
H -1.134625 1.635398 1.002407  
H -0.729704 1.724980 -0.719507

#### Z-1be

SCF = -340.612600993  
Num. Imaginary Freq = 0

C 1.273354 -0.452963 0.000074  
N 2.492216 -0.536702 -0.000112  
C 0.005222 -0.326164 0.000157  
N -1.217114 -0.572930 -0.000025  
C 3.344091 0.639478 -0.000012  
H 3.987848 0.596514 0.879203  
H 3.987340 0.597032 -0.879645  
H 2.778278 1.574616 0.000379  
O -2.003898 0.557137 0.000070  
C -3.371196 0.178423 -0.000082  
H -3.930918 1.111419 -0.000241  
H -3.612833 -0.401037 -0.893038  
H -3.613072 -0.400867 0.892923

#### Z-1bf

SCF = -663.632539959  
Num. Imaginary Freq = 0

C 1.402068 -0.662232 -0.000002  
N 2.627043 -0.534692 -0.000060  
C 0.149517 -0.874314 0.000006  
N -1.050984 -1.193257 0.000002  
C 3.227681 0.787546 0.000028  
H 3.868921 0.874554 -0.878528  
H 2.491402 1.596810 -0.000108  
H 3.868535 0.874550 0.878875  
S -2.301449 -0.088066 0.000018



C -1.504137 1.517437 -0.000023  
H -2.307243 2.254571 0.000037  
H -0.890703 1.646817 0.892020  
H -0.890916 1.646765 -0.892228

**Z-1bf**

SCF = -563.221856465  
Num. Imaginary Freq = 0

C -1.783613 -0.629964 -0.000042  
N -3.008660 -0.552712 0.000005  
C -0.512964 -0.716808 -0.000001  
N 0.693109 -0.995640 -0.000033  
C -3.671477 0.739539 0.000020  
H -4.316742 0.784324 -0.878248  
H -4.316893 0.784245 0.878170  
H -2.975122 1.581191 0.000091  
C 1.652246 0.068882 0.000007  
F 2.419602 -0.043187 1.079629  
F 1.128959 1.299363 0.000132  
F 2.419490 -0.042975 -1.079730

**Z-1bh**

SCF = -339.449375892  
Num. Imaginary Freq = 0

C -1.065852 -0.515652 -0.122062  
N -2.290772 -0.445113 -0.206276  
C 0.200773 -0.632543 -0.056383  
N 1.410376 -0.870902 -0.019322  
C -2.986701 0.770561 0.178043  
H -3.555818 1.118018 -0.685302  
H -3.705824 0.514424 0.957363  
H -2.316869 1.559801 0.527910  
C 2.387418 0.072903 0.348030  
O 2.704291 1.006904 -0.324135  
H 2.893120 -0.206986 1.286539

**Z-1bi**

SCF = -318.341352015  
Num. Imaginary Freq = 0

C 1.027652 -0.518061 0.000085  
N 2.253910 -0.469781 -0.000196  
C -0.244660 -0.514325 0.000153  
N -1.458278 -0.804548 -0.000041  
C 2.955530 0.800421 0.000008  
H 3.602862 0.823796 -0.877597  
H 2.285135 1.662694 -0.000356  
H 3.601859 0.823964 0.878396  
C -2.403154 0.146734 0.000039  
N -3.295927 0.874462 -0.000070

**Z-1bj**

SCF = -430.615942594  
Num. Imaginary Freq = 0

C -1.427530 -0.556220 -0.004753  
N -2.643108 -0.461132 -0.003776

C -0.153041 -0.642662 -0.005829  
N 1.034501 -0.995286 -0.009334  
C -3.324960 0.820485 0.008088  
H -3.969632 0.863577 -0.870054  
H -3.968520 0.847869 0.887681  
H -2.639055 1.670018 0.015274  
N 1.978933 0.140268 0.000966  
O 2.341646 0.493815 1.084496  
O 2.335618 0.518931 -1.076113

**Z-1bk**

SCF = -325.314784333  
Num. Imaginary Freq = 0

C -0.584922 -0.423903 -0.000123  
N -1.790066 -0.543435 0.000163  
C 0.688176 -0.275570 -0.000321  
N 1.896719 -0.541475 0.000150  
C -2.728047 0.563418 0.000005  
H -3.364248 0.465942 -0.879448  
H -3.363715 0.466536 0.879924  
H -2.233337 1.536522 -0.000457  
F 2.662609 0.660189 0.000048

**Z-1bl**

SCF = -685.699093124  
Num. Imaginary Freq = 0

C -1.113961 -0.514667 0.000125  
N -2.333303 -0.484494 0.000006  
C 0.156251 -0.645911 -0.000040  
N 1.361809 -0.905313 -0.000079  
C -3.084179 0.758488 -0.000017  
H -3.728736 0.761599 -0.879412  
H -3.729645 0.760734 0.878575  
H -2.446688 1.644982 0.000650  
Cl 2.409227 0.527875 0.000017

**Z-1cc**

SCF = -297.480497413  
Num. Imaginary Freq = 0

C 0.632220 -0.402184 0.002863  
N 1.869517 -0.516800 0.011490  
C -0.632187 -0.401952 -0.003060  
N -1.869522 -0.516882 -0.011403  
N -2.654921 0.598227 -0.082114  
H -3.571979 0.402766 0.284537  
H -2.239920 1.439961 0.299930  
N 2.654848 0.598249 0.082171  
H 3.572145 0.402668 -0.283845  
H 2.240105 1.439866 -0.300451

**Z-1cd**

SCF = -376.102269012  
Num. Imaginary Freq = 0

C -0.282234 -0.653797 0.050688  
N 0.939699 -0.910345 0.115939

|   |           |           |           |
|---|-----------|-----------|-----------|
| C | -1.541519 | -0.570040 | -0.001735 |
| N | -2.782641 | -0.560263 | -0.065077 |
| N | -3.444794 | 0.642405  | -0.124577 |
| H | -4.386915 | 0.527356  | 0.213273  |
| H | -2.960674 | 1.408715  | 0.329560  |
| N | 1.854895  | 0.069755  | 0.258415  |
| C | 3.175089  | -0.322714 | -0.182822 |
| H | 3.284259  | -0.256734 | -1.273379 |
| H | 3.918685  | 0.322753  | 0.284806  |
| H | 3.350309  | -1.350987 | 0.124722  |
| C | 1.448044  | 1.429743  | 0.001453  |
| H | 2.293486  | 2.090474  | 0.183936  |
| H | 1.100902  | 1.562107  | -1.033386 |
| H | 0.633558  | 1.706300  | 0.672059  |

**Z-1ce**

SCF = -356.634913907  
 Num. Imaginary Freq = 0

|   |           |           |           |
|---|-----------|-----------|-----------|
| C | -0.012671 | -0.448266 | 0.003516  |
| N | 1.217607  | -0.631280 | 0.011874  |
| C | -1.275653 | -0.412416 | 0.002039  |
| N | -2.514290 | -0.470955 | 0.003591  |
| N | -3.259643 | 0.657041  | -0.084005 |
| H | -4.188836 | 0.507285  | 0.270802  |
| H | -2.816563 | 1.509111  | 0.236237  |
| O | 1.949585  | 0.545466  | -0.006056 |
| C | 3.330713  | 0.230843  | -0.001605 |
| H | 3.846842  | 1.188930  | -0.016078 |
| H | 3.601117  | -0.323598 | 0.899503  |
| H | 3.600712  | -0.350066 | -0.885941 |

**Z-1cf**

SCF = -679.657544530  
 Num. Imaginary Freq = 0

|   |           |           |           |
|---|-----------|-----------|-----------|
| C | -0.168301 | -0.874621 | 0.002856  |
| N | 1.026276  | -1.195008 | 0.006429  |
| C | -1.395237 | -0.564141 | 0.000620  |
| N | -2.639724 | -0.475233 | -0.006588 |
| N | -3.224345 | 0.745019  | -0.073145 |
| H | -4.172224 | 0.717049  | 0.262430  |
| H | -2.675554 | 1.525295  | 0.266412  |
| S | 2.298578  | -0.107791 | 0.004215  |
| C | 1.524255  | 1.509214  | -0.010492 |
| H | 2.340870  | 2.231522  | -0.023118 |
| H | 0.910227  | 1.641461  | -0.901798 |
| H | 0.919679  | 1.663167  | 0.883861  |

**Z-1cg**

SCF = -579.252849943  
 Num. Imaginary Freq = 0

|   |           |           |           |
|---|-----------|-----------|-----------|
| C | 0.524347  | -0.737886 | -0.004469 |
| N | -0.686939 | -0.996435 | -0.008659 |
| C | 1.764414  | -0.523893 | -0.003950 |
| N | 3.018284  | -0.486375 | -0.003148 |
| N | 3.650733  | 0.669489  | 0.042074  |
| H | 4.637691  | 0.625979  | -0.130510 |

|   |           |           |           |
|---|-----------|-----------|-----------|
| H | 3.150325  | 1.534970  | -0.104848 |
| C | -1.640279 | 0.053982  | 0.000023  |
| F | -2.423092 | -0.044386 | -1.073790 |
| F | -1.117916 | 1.290645  | -0.001138 |
| F | -2.409376 | -0.048583 | 1.083136  |

**Z-1ch**

SCF = -355.480646832  
 Num. Imaginary Freq = 0

|   |           |           |           |
|---|-----------|-----------|-----------|
| C | 0.240473  | -0.706519 | 0.061807  |
| N | 1.454733  | -0.950401 | 0.023794  |
| C | -0.992780 | -0.450613 | 0.059651  |
| N | -2.244902 | -0.409318 | 0.154606  |
| N | -2.894638 | 0.688266  | -0.188507 |
| H | -3.857637 | 0.715934  | 0.091525  |
| H | -2.390031 | 1.554035  | -0.322873 |
| C | 2.394418  | 0.062835  | -0.238428 |
| O | 2.372734  | 1.161170  | 0.236621  |
| H | 3.206773  | -0.293377 | -0.889050 |

**Z-1ci**

SCF = -334.374416298  
 Num. Imaginary Freq = 0

|   |           |           |           |
|---|-----------|-----------|-----------|
| C | 0.235104  | -0.583740 | 0.000284  |
| N | 1.459052  | -0.830343 | -0.000556 |
| C | -1.004851 | -0.410882 | 0.001149  |
| N | -2.264170 | -0.395944 | -0.000377 |
| N | -2.914032 | 0.738559  | -0.000009 |
| H | -3.914762 | 0.682114  | -0.001832 |
| H | -2.436577 | 1.628676  | 0.000267  |
| C | 2.379508  | 0.134934  | -0.000174 |
| N | 3.246690  | 0.894491  | 0.000088  |

**Z-1cj**

SCF = -446.645214230  
 Num. Imaginary Freq = 0

|   |           |           |           |
|---|-----------|-----------|-----------|
| C | -0.133046 | -0.766201 | -0.017473 |
| N | 1.087041  | -1.021148 | -0.029056 |
| C | -1.371919 | -0.558111 | -0.007469 |
| N | -2.619544 | -0.477694 | -0.003839 |
| N | -3.225953 | 0.683369  | 0.052948  |
| H | -4.221860 | 0.665343  | -0.059749 |
| H | -2.710599 | 1.548378  | -0.025347 |
| N | 1.921036  | 0.202236  | -0.001313 |
| O | 1.385474  | 1.279895  | -0.047402 |
| O | 3.092550  | -0.026794 | 0.060347  |

**Z-1ck**

SCF = -341.337197390  
 Num. Imaginary Freq = 0

|   |           |           |           |
|---|-----------|-----------|-----------|
| C | 0.680980  | -0.407893 | 0.002349  |
| N | 1.911751  | -0.558564 | 0.010000  |
| C | -0.584825 | -0.396105 | 0.001453  |
| N | -1.815938 | -0.496424 | 0.003731  |
| N | -2.626834 | 0.565229  | -0.071776 |

H -3.562575 0.357902 0.229894  
H -2.252305 1.462783 0.204771  
F 2.550566 0.714623 -0.005684

**Z-1cl**

SCF = -701.724577652  
Num. Imaginary Freq = 0

C 0.140314 -0.639352 0.003042  
N 1.348699 -0.904970 0.008947  
C -1.110568 -0.451105 0.001637  
N -2.353232 -0.430450 0.001570  
N -3.030976 0.717248 -0.065422  
H -3.991563 0.626251 0.213294  
H -2.553962 1.572053 0.187836  
Cl 2.389154 0.510096 -0.002639

**Z-1dd**

SCF = -454.724026058  
Num. Imaginary Freq = 0

C 0.629635 -0.876601 0.043462  
N 1.867122 -0.998491 0.161576  
C -0.629483 -0.876548 -0.043176  
N -1.866970 -0.998446 -0.161410  
N -2.665577 0.092436 -0.292123  
N 2.665653 0.092486 0.292226  
C 4.025622 -0.173211 -0.122957  
H 4.134960 -0.171769 -1.216161  
H 4.684892 0.586437 0.297373  
H 4.319012 -1.149558 0.255941  
C 2.117630 1.373886 -0.083903  
H 2.863510 2.144408 0.103645  
H 1.831607 1.399584 -1.146117  
H 1.231930 1.588740 0.514827  
C -2.117812 1.373933 0.084041  
H -2.863638 2.144390 -0.104048  
H -1.832347 1.399876 1.146390  
H -1.231838 1.588702 -0.514303  
C -4.025675 -0.173347 0.122470  
H -4.135503 -0.171875 1.215618  
H -4.684869 0.586221 -0.298150  
H -4.318817 -1.149719 -0.256517

**Z-1de**

SCF = -435.257854684  
Num. Imaginary Freq = 0

C -0.932087 -0.679352 0.008857  
N -2.174887 -0.738644 -0.032596  
C 0.327840 -0.731295 0.041314  
N 1.562079 -0.912438 0.090220  
N 2.416132 0.107773 0.226576  
C 1.930266 1.451646 0.021830  
H 2.737836 2.152318 0.224236  
H 1.570650 1.598283 -1.005842  
H 1.103252 1.654534 0.703295  
C 3.768384 -0.200571 -0.181784  
H 3.905629 -0.095002 -1.265311

H 4.460720 0.469637 0.327594  
H 3.989267 -1.226716 0.102150  
O -2.779419 0.516492 0.001689  
C -4.183064 0.349147 -0.044189  
H -4.598502 1.355034 -0.016395  
H -4.487402 -0.152279 -0.965775  
H -4.537398 -0.222035 0.816969

**Z-1df**

SCF = -758.280679780  
Num. Imaginary Freq = 0

C 0.742908 -1.075816 -0.008832  
N 1.968064 -1.245555 0.043085  
C -0.509047 -0.907130 -0.052172  
N -1.760483 -0.995904 -0.111785  
N -2.520888 0.099296 -0.219206  
C -1.931715 1.391146 0.036532  
H -2.674777 2.162929 -0.154513  
H -1.581374 1.474858 1.074744  
H -1.078830 1.546580 -0.625043  
C -3.902906 -0.104618 0.152475  
H -4.055748 -0.010306 1.235044  
H -4.528176 0.629269 -0.356247  
H -4.198283 -1.103912 -0.157768  
S 3.090186 0.001408 0.057356  
C 2.111391 1.500847 -0.067986  
H 2.821938 2.327292 -0.037354  
H 1.563447 1.530827 -1.010024  
H 1.418181 1.588506 0.768711

**Z-1dg**

SCF = -657.879893840  
Num. Imaginary Freq = 0

C -0.353067 -0.988791 0.000075  
N -1.592146 -1.100256 -0.000091  
C 0.897727 -0.926097 0.000142  
N 2.163469 -0.999454 0.000104  
N 2.878031 0.089608 0.000247  
C 2.253989 1.391061 0.000167  
H 3.027574 2.154850 0.000975  
H 1.619752 1.508099 -0.883459  
H 1.618505 1.507492 0.882961  
C 4.315579 -0.051551 -0.000325  
H 4.747189 0.414722 -0.889218  
H 4.747915 0.415540 0.887772  
H 4.549803 -1.112379 0.000059  
C -2.396166 0.058806 -0.000091  
F -3.184355 0.070952 -1.077803  
F -1.716474 1.222629 -0.000222  
F -3.184125 0.071067 1.077945

**Z-1dh**

SCF = -434.108250370  
Num. Imaginary Freq = 0

C 1.184958 -0.993039 0.000450  
N 2.441420 -0.997323 -0.000366

|   |           |           |           |
|---|-----------|-----------|-----------|
| C | -0.061364 | -1.000754 | 0.000089  |
| N | -1.335520 | -1.038766 | 0.000357  |
| N | -1.991642 | 0.082516  | -0.000069 |
| C | -1.304484 | 1.353737  | -0.000620 |
| H | -2.041588 | 2.152586  | -0.000371 |
| H | -0.658019 | 1.436485  | 0.877673  |
| H | -0.658933 | 1.436220  | -0.879625 |
| C | -3.434833 | 0.014626  | 0.000056  |
| H | -3.839688 | 0.504856  | 0.888384  |
| H | -3.839802 | 0.504960  | -0.888154 |
| H | -3.723286 | -1.032703 | 0.000019  |
| C | 3.063795  | 0.263556  | -0.000711 |
| O | 2.514252  | 1.334055  | 0.001249  |
| H | 4.159075  | 0.171415  | -0.002950 |

**Z-1di**

SCF = -413.002682712  
 Num. Imaginary Freq = 0

|   |           |           |           |
|---|-----------|-----------|-----------|
| C | -1.172197 | -0.822619 | 0.000010  |
| N | -2.423340 | -0.910689 | 0.000201  |
| C | 0.074381  | -0.802677 | -0.000299 |
| N | 1.340762  | -0.927671 | -0.000651 |
| N | 2.097103  | 0.126139  | -0.001509 |
| C | -3.193746 | 0.176126  | 0.000184  |
| N | -3.936827 | 1.058663  | 0.000399  |
| C | 1.534109  | 1.456465  | -0.000399 |
| H | 0.905085  | 1.600940  | -0.883302 |
| H | 0.908622  | 1.601207  | 0.885036  |
| H | 2.342520  | 2.182901  | -0.002133 |
| C | 3.528749  | -0.076083 | 0.001372  |
| H | 3.978993  | 0.378188  | -0.883969 |
| H | 3.974752  | 0.369991  | 0.893112  |
| H | 3.718367  | -1.145591 | -0.003032 |

**Z-1dj**

SCF = -525.274248313  
 Num. Imaginary Freq = 0

|   |           |           |           |
|---|-----------|-----------|-----------|
| C | -0.761023 | -1.021118 | -0.000255 |
| N | -2.013991 | -1.091084 | 0.000009  |
| C | 0.486515  | -0.987544 | -0.000486 |
| N | 1.752518  | -1.018101 | -0.000128 |
| N | 2.424072  | 0.091027  | -0.000179 |
| C | 1.746659  | 1.368112  | -0.000270 |
| H | 2.488325  | 2.162472  | -0.000098 |
| H | 1.104295  | 1.454987  | -0.881247 |
| H | 1.103881  | 1.454950  | 0.880402  |
| C | 3.867321  | 0.005962  | 0.000613  |
| H | 4.277085  | 0.491568  | -0.887676 |
| H | 4.276132  | 0.491502  | 0.889385  |
| H | 4.144852  | -1.044216 | 0.000729  |
| N | -2.634285 | 0.227692  | 0.000131  |
| O | -1.934298 | 1.215320  | -0.000265 |
| O | -3.831902 | 0.200871  | 0.000523  |

**Z-1dk**

SCF = -419.961902811  
 Num. Imaginary Freq = 0

|   |           |           |           |
|---|-----------|-----------|-----------|
| C | -1.576616 | -0.579233 | -0.007650 |
| N | -2.818204 | -0.591094 | -0.039478 |
| C | -0.317870 | -0.673906 | 0.025767  |
| N | 0.906061  | -0.900647 | 0.074276  |
| N | 1.806454  | 0.059316  | 0.178556  |
| C | 1.398528  | 1.434201  | 0.008439  |
| H | 2.251518  | 2.081739  | 0.197951  |
| H | 1.022243  | 1.614614  | -1.006218 |
| H | 0.602771  | 1.673533  | 0.715862  |
| C | 3.166561  | -0.326905 | -0.125423 |
| H | 3.396333  | -0.198792 | -1.189060 |
| H | 3.855366  | 0.281250  | 0.460622  |
| H | 3.294951  | -1.372731 | 0.141450  |
| F | -3.300775 | 0.758046  | -0.024542 |

**Z-1dl**

SCF = -780.349745016  
 Num. Imaginary Freq = 0

|    |           |           |           |
|----|-----------|-----------|-----------|
| C  | -1.060297 | -0.859299 | 0.000335  |
| N  | -2.295655 | -0.969126 | -0.026990 |
| C  | 0.199585  | -0.814124 | 0.023189  |
| N  | 1.447687  | -0.936601 | 0.056626  |
| N  | 2.237931  | 0.111917  | 0.138379  |
| C  | 1.689874  | 1.441350  | 0.018475  |
| H  | 2.485237  | 2.167438  | 0.169567  |
| H  | 1.237929  | 1.593882  | -0.969114 |
| H  | 0.913957  | 1.592357  | 0.771923  |
| C  | 3.641930  | -0.124610 | -0.107945 |
| H  | 3.908208  | 0.083173  | -1.149909 |
| H  | 4.242084  | 0.511928  | 0.542876  |
| H  | 3.855984  | -1.167338 | 0.111407  |
| Cl | -3.129393 | 0.583254  | -0.015128 |

**Z-1ee**

SCF = -415.786812456  
 Num. Imaginary Freq = 0

|   |           |           |           |
|---|-----------|-----------|-----------|
| C | 0.631661  | -0.462866 | -0.000069 |
| N | 1.864781  | -0.607114 | -0.000096 |
| C | -0.631680 | -0.462982 | 0.000037  |
| N | -1.864845 | -0.607237 | 0.000123  |
| O | 2.570773  | 0.573122  | -0.000166 |
| C | 3.961277  | 0.288197  | 0.000122  |
| H | 4.453152  | 1.258576  | -0.000908 |
| H | 4.241327  | -0.271655 | 0.894212  |
| H | 4.241293  | -0.273549 | -0.892777 |
| O | -2.570726 | 0.573054  | 0.000177  |
| C | -3.961248 | 0.288298  | -0.000131 |
| H | -4.241328 | -0.273580 | 0.892667  |
| H | -4.453026 | 1.258726  | 0.001093  |
| H | -4.241410 | -0.271350 | -0.894319 |

**Z-1ef**

SCF = -738.812035524  
 Num. Imaginary Freq = 0

|   |           |           |           |
|---|-----------|-----------|-----------|
| C | -0.450545 | -0.938480 | -0.000358 |
|---|-----------|-----------|-----------|

|   |           |           |           |
|---|-----------|-----------|-----------|
| N | -1.662560 | -1.165946 | 0.000306  |
| C | 0.796087  | -0.717037 | -0.000156 |
| N | 2.042075  | -0.727317 | -0.000196 |
| S | -2.849616 | 0.005199  | 0.000509  |
| C | -1.952545 | 1.557575  | 0.000322  |
| H | -2.711118 | 2.340655  | 0.000387  |
| H | -1.332785 | 1.650985  | 0.892136  |
| H | -1.332989 | 1.650881  | -0.891641 |
| O | 2.597847  | 0.537455  | -0.000416 |
| C | 4.011777  | 0.426414  | -0.000577 |
| H | 4.359643  | -0.096260 | -0.893595 |
| H | 4.383246  | 1.449181  | -0.000618 |
| H | 4.359829  | -0.096256 | 0.892366  |

**Z-1eg**

SCF = -638.402064671  
 Num. Imaginary Freq = 0

|   |           |           |           |
|---|-----------|-----------|-----------|
| C | -1.195325 | 0.582134  | 0.001529  |
| N | -2.440677 | 0.661011  | -0.001854 |
| C | 0.052796  | 0.788660  | 0.002705  |
| N | 1.266507  | 0.992958  | -0.004554 |
| C | 2.190530  | -0.094788 | -0.000519 |
| F | 2.963514  | -0.004487 | 1.077189  |
| F | 2.960880  | -0.014039 | -1.080716 |
| F | 1.623722  | -1.304566 | 0.005545  |
| O | -3.073637 | -0.539272 | 0.003071  |
| C | -4.485228 | -0.343870 | -0.001874 |
| H | -4.911369 | -1.344038 | 0.002545  |
| H | -4.797454 | 0.202707  | 0.888501  |
| H | -4.792576 | 0.192733  | -0.899971 |

**Z-1eh**

SCF = -414.630652474  
 Num. Imaginary Freq = 0

|   |           |           |           |
|---|-----------|-----------|-----------|
| C | -0.833161 | -0.647999 | -0.077820 |
| N | -2.044218 | -0.828386 | -0.048582 |
| C | 0.420072  | -0.455230 | -0.080309 |
| N | 1.657750  | -0.552105 | -0.208942 |
| O | 2.344965  | 0.545354  | 0.213815  |
| C | 3.740709  | 0.344461  | 0.019815  |
| H | 3.963188  | 0.200120  | -1.038121 |
| H | 4.214025  | 1.254332  | 0.381067  |
| H | 4.087771  | -0.514069 | 0.596147  |
| C | -3.016814 | 0.107704  | 0.348179  |
| O | -3.334182 | 1.057092  | -0.299066 |
| H | -3.510807 | -0.190131 | 1.286392  |

**Z-1ei**

SCF = -393.521978528  
 Num. Imaginary Freq = 0

|   |           |           |           |
|---|-----------|-----------|-----------|
| C | -0.896726 | -0.596711 | 0.000014  |
| N | -2.123029 | -0.782681 | -0.000004 |
| C | 0.357256  | -0.490792 | 0.000032  |
| N | 1.603743  | -0.591424 | -0.000004 |
| C | -3.018368 | 0.207934  | -0.000026 |
| N | -3.871083 | 0.982151  | -0.000032 |

|   |          |           |           |
|---|----------|-----------|-----------|
| O | 2.255485 | 0.591763  | 0.000180  |
| C | 3.666420 | 0.376069  | -0.000120 |
| H | 3.965746 | -0.169750 | -0.894915 |
| H | 4.105396 | 1.370407  | -0.000019 |
| H | 3.966076 | -0.170071 | 0.894368  |

**Z-1ej**

SCF = -505.792320407  
 Num. Imaginary Freq = 0

|   |           |           |           |
|---|-----------|-----------|-----------|
| C | -0.460786 | 0.767646  | 0.006578  |
| N | -1.673936 | 1.002085  | 0.008698  |
| C | 0.792095  | 0.598202  | 0.004872  |
| N | 2.035164  | 0.625796  | 0.004897  |
| N | -2.515289 | -0.203201 | -0.001298 |
| O | -2.836473 | -0.610498 | 1.075603  |
| O | -2.845818 | -0.585305 | -1.084541 |
| O | 2.631835  | -0.590132 | -0.005514 |
| C | 4.050133  | -0.436682 | -0.004383 |
| H | 4.374925  | 0.087094  | 0.894868  |
| H | 4.443821  | -1.449883 | -0.013165 |
| H | 4.374676  | 0.102514  | -0.894566 |

**Z-1ek**

SCF = -400.485982751  
 Num. Imaginary Freq = 0

|   |           |           |           |
|---|-----------|-----------|-----------|
| C | 1.314959  | -0.388153 | -0.000010 |
| N | 2.546964  | -0.517133 | 0.000008  |
| C | 0.049407  | -0.410975 | 0.000021  |
| N | -1.174849 | -0.590314 | -0.000047 |
| F | 3.171308  | 0.746881  | 0.000024  |
| O | -1.933449 | 0.538861  | -0.000108 |
| C | -3.315027 | 0.189759  | 0.000083  |
| H | -3.845716 | 1.138734  | -0.000925 |
| H | -3.564556 | -0.382503 | -0.893983 |
| H | -3.564741 | -0.380699 | 0.895260  |

**Z-1el**

SCF = -760.874471030  
 Num. Imaginary Freq = 0

|    |           |           |           |
|----|-----------|-----------|-----------|
| C  | -0.486987 | 0.525948  | 0.001888  |
| N  | -1.725598 | 0.616039  | 0.000018  |
| C  | 0.773819  | 0.648881  | 0.000480  |
| N  | 1.989411  | 0.859602  | -0.001330 |
| O  | -2.384403 | -0.576936 | 0.001099  |
| C  | -3.789828 | -0.348933 | -0.001222 |
| H  | -4.238453 | -1.339439 | 0.002975  |
| H  | -4.089470 | 0.203469  | 0.890147  |
| H  | -4.087891 | 0.195128  | -0.898262 |
| Cl | 2.980137  | -0.572267 | -0.000078 |

**Z-1ff**

SCF = -1061.83298457  
 Num. Imaginary Freq = 0

|   |          |           |           |
|---|----------|-----------|-----------|
| C | 0.865942 | -0.995536 | 0.000569  |
| N | 2.091995 | -1.190511 | -0.000121 |

|   |           |           |           |
|---|-----------|-----------|-----------|
| C | -0.391859 | -0.861159 | 0.000266  |
| N | -1.633198 | -0.838298 | 0.000065  |
| S | 3.222218  | 0.035224  | -0.000315 |
| C | 2.261555  | 1.548661  | 0.000271  |
| H | 2.983907  | 2.365097  | 0.000200  |
| H | 1.637401  | 1.614303  | -0.891397 |
| H | 1.637981  | 1.613949  | 0.892374  |
| S | -2.452942 | 0.634813  | 0.000005  |
| C | -4.129463 | 0.004788  | -0.000257 |
| H | -4.317636 | -0.586078 | 0.893900  |
| H | -4.781210 | 0.879060  | -0.000158 |
| H | -4.317490 | -0.585772 | -0.894647 |

**Z-1fg**

SCF = -961.425764940  
 Num. Imaginary Freq = 0

|   |           |           |           |
|---|-----------|-----------|-----------|
| C | -1.014728 | -1.125225 | -0.000431 |
| N | -2.254246 | -1.209270 | -0.000067 |
| C | 0.247519  | -1.060303 | -0.000385 |
| N | 1.485365  | -1.125139 | -0.000272 |
| C | 2.243463  | 0.081233  | -0.000018 |
| F | 3.019900  | 0.114879  | 1.079589  |
| F | 1.509945  | 1.206121  | -0.000884 |
| F | 3.021571  | 0.114333  | -1.078131 |
| S | -3.270538 | 0.091654  | 0.000385  |
| C | -2.190200 | 1.520990  | -0.000386 |
| H | -2.842704 | 2.394021  | -0.000032 |
| H | -1.562218 | 1.531209  | 0.890555  |
| H | -1.563378 | 1.531008  | -0.892145 |

**Z-1fh**

SCF = -737.653172740  
 Num. Imaginary Freq = 0

|   |           |           |           |
|---|-----------|-----------|-----------|
| C | -1.025165 | -0.985323 | 0.022930  |
| N | -2.262796 | -0.970133 | 0.113800  |
| C | 0.233381  | -1.066879 | -0.047271 |
| N | 1.468282  | -1.192200 | -0.141681 |
| S | 2.525235  | 0.073474  | -0.032989 |
| C | 1.495485  | 1.519529  | 0.209665  |
| H | 0.949633  | 1.453157  | 1.150982  |
| H | 2.173184  | 2.372636  | 0.238165  |
| H | 0.791695  | 1.634222  | -0.614973 |
| C | -2.942263 | 0.263044  | 0.219448  |
| O | -2.692598 | 1.239140  | -0.425518 |
| H | -3.784521 | 0.205390  | 0.924331  |

**Z-1fi**

SCF = -716.546062014  
 Num. Imaginary Freq = 0

|   |           |           |           |
|---|-----------|-----------|-----------|
| C | 1.021830  | -0.879750 | -0.000087 |
| N | 2.271461  | -0.908212 | 0.000032  |
| C | -0.229876 | -1.011640 | -0.000072 |
| N | -1.467488 | -1.152321 | -0.000030 |
| C | 2.988272  | 0.220298  | 0.000076  |
| N | 3.690158  | 1.134510  | -0.000005 |
| S | -2.545639 | 0.087157  | 0.000079  |

|   |           |          |           |
|---|-----------|----------|-----------|
| C | -1.550729 | 1.576366 | -0.000072 |
| H | -0.926549 | 1.623031 | -0.892736 |
| H | -2.252849 | 2.409924 | 0.000025  |
| H | -0.926280 | 1.623041 | 0.892399  |

**Z-1fj**

SCF = -828.819488020  
 Num. Imaginary Freq = 0

|   |           |           |           |
|---|-----------|-----------|-----------|
| C | -0.653256 | -1.098837 | 0.000065  |
| N | -1.896682 | -1.123085 | -0.000070 |
| C | 0.610108  | -1.125595 | 0.000013  |
| N | 1.844428  | -1.202986 | 0.000141  |
| N | -2.477044 | 0.261943  | -0.000089 |
| O | -3.669733 | 0.270249  | -0.000004 |
| O | -1.730450 | 1.206217  | 0.000077  |
| S | 2.861612  | 0.090725  | -0.000088 |
| C | 1.776598  | 1.516161  | 0.000043  |
| H | 1.147363  | 1.522539  | 0.890048  |
| H | 2.426747  | 2.390956  | -0.000859 |
| H | 1.145954  | 1.521703  | -0.888975 |

**Z-1fk**

SCF = -723.513701497  
 Num. Imaginary Freq = 0

|   |           |           |           |
|---|-----------|-----------|-----------|
| C | 1.440860  | -0.559886 | -0.002461 |
| N | 2.678440  | -0.494374 | 0.001249  |
| C | 0.208101  | -0.868544 | -0.006354 |
| N | -0.979210 | -1.172989 | 0.000413  |
| F | 3.085466  | 0.872361  | 0.002614  |
| S | -2.267413 | -0.130992 | 0.003122  |
| C | -1.518113 | 1.497697  | -0.003152 |
| H | -2.346548 | 2.206471  | -0.001663 |
| H | -0.908482 | 1.649023  | 0.887511  |
| H | -0.915249 | 1.645058  | -0.899166 |

**Z-1fl**

SCF = -1083.89978308  
 Num. Imaginary Freq = 0

|    |           |           |           |
|----|-----------|-----------|-----------|
| C  | 0.316370  | -1.019760 | -0.001236 |
| N  | 1.539574  | -1.176213 | 0.000602  |
| C  | -0.952729 | -0.991992 | -0.002517 |
| N  | -2.188769 | -0.965309 | 0.000392  |
| S  | 2.653939  | 0.050725  | 0.001171  |
| C  | 1.668870  | 1.548732  | -0.001571 |
| H  | 2.377765  | 2.376790  | -0.001266 |
| H  | 1.046577  | 1.601225  | -0.895153 |
| H  | 1.043961  | 1.602810  | 0.890093  |
| Cl | -2.857766 | 0.669197  | 0.000739  |

**Z-1gg**

SCF = -861.006352180  
 Num. Imaginary Freq = 0

|   |           |          |           |
|---|-----------|----------|-----------|
| C | 0.636307  | 0.987774 | -0.000085 |
| N | 1.863731  | 1.086523 | 0.000433  |
| C | -0.636073 | 0.986540 | 0.000002  |

N -1.863459 1.086196 -0.000372  
C 2.671140 -0.108135 -0.000050  
F 3.439325 -0.094149 1.079920  
F 1.974757 -1.243567 -0.000198  
F 3.438863 -0.093463 -1.080022  
C -2.671273 -0.108201 0.000029  
F -3.438685 -0.094329 -1.080347  
F -1.974856 -1.243563 0.000980  
F -3.439683 -0.092806 1.079689

**Z-1gh**

SCF = -637.235493209  
Num. Imaginary Freq = 0

C 1.379278 -0.845600 -0.122252  
N 2.602031 -0.891469 -0.038989  
C 0.108711 -0.833867 -0.207650  
N -1.110645 -0.966810 -0.342681  
C 3.423744 0.180759 0.385286  
O 3.720107 1.096219 -0.313834  
H 3.821364 0.010480 1.398410  
C -1.980421 0.123819 0.014995  
F -2.829958 -0.302670 0.940477  
F -2.661896 0.490506 -1.061581  
F -1.353678 1.198502 0.494623

**Z-1gi**

SCF = -616.124082834  
Num. Imaginary Freq = 0

C -1.427814 -0.771788 0.000007  
N -2.666062 -0.853403 -0.000027  
C -0.163212 -0.876332 0.000143  
N 1.059585 -1.022045 0.000201  
C -3.460031 0.225531 -0.000063  
N -4.237243 1.074949 0.000018  
C 1.918147 0.137975 0.000033  
F 2.682366 0.089652 -1.080413  
F 2.683117 0.089460 1.079813  
F 1.268239 1.299908 0.000370

**Z-1gj**

SCF = -728.398368234  
Num. Imaginary Freq = 0

C 1.022407 0.950838 -0.000339  
N 2.249862 1.077391 -0.000295  
C -0.250724 0.958279 -0.000372  
N -1.473272 1.045218 -0.000284  
N 2.979051 -0.219821 0.000038  
O 3.259683 -0.636012 -1.081591  
O 3.260339 -0.634987 1.081891  
C -2.289852 -0.143460 0.000110  
F -3.055968 -0.123059 1.079159  
F -3.054043 -0.125232 -1.080462  
F -1.594505 -1.278982 0.001859

**Z-1gk**

SCF = -623.097723981

Num. Imaginary Freq = 0

C 1.805139 -0.471959 -0.000164  
N 3.042436 -0.524195 0.000132  
C 0.553515 -0.700037 -0.000136  
N -0.638037 -0.964672 -0.000008  
F 3.592926 0.765136 -0.000006  
C -1.642739 0.062629 -0.000011  
F -2.395104 -0.082649 1.079862  
F -2.396717 -0.084159 -1.078528  
F -1.148470 1.299258 -0.001217

**Z-1gl**

SCF = -983.483847506  
Num. Imaginary Freq = 0

C 0.051240 -0.866100 -0.000068  
N -1.166048 -1.022032 -0.000190  
C 1.322516 -0.824189 0.000033  
N 2.553386 -0.910299 -0.000034  
Cl 3.398971 0.612058 0.000013  
C -2.047376 0.113325 -0.000028  
F -2.814740 0.053519 -1.079055  
F -2.813635 0.054062 1.079898  
F -1.421864 1.290543 -0.000652

**Z-1hh**

SCF = -413.464487431  
Num. Imaginary Freq = 0

C -0.629500 -0.717399 0.094110  
N -1.840756 -0.794362 0.288621  
C 0.630316 -0.718268 -0.093215  
N 1.841521 -0.795259 -0.287919  
C -2.707664 0.319259 0.367783  
O -3.080400 0.933100 -0.582159  
H -3.064431 0.484878 1.396840  
C 2.708016 0.318872 -0.368067  
O 3.078597 0.935095 0.581094  
H 3.066489 0.482125 -1.396893

**Z-1hi**

SCF = -392.353720928  
Num. Imaginary Freq = 0

C -0.676498 -0.617604 -0.089940  
N -1.906096 -0.753362 -0.219610  
C 0.587903 -0.741665 -0.030857  
N 1.808589 -0.826172 0.050286  
C -2.762208 0.251333 0.012898  
N -3.588549 1.034242 0.186347  
C 2.674160 0.248388 0.377898  
O 2.970695 1.105017 -0.390938  
H 3.096691 0.134194 1.388343

**Z-1hj**

SCF = -504.628443126  
Num. Imaginary Freq = 0

C 0.274505 0.743708 -0.285123  
N 1.487970 0.904470 -0.454846  
C -0.998021 0.771139 -0.201823  
N -2.213638 0.816178 -0.115294  
N 2.309865 -0.217719 0.068255  
O 2.657066 -1.006883 -0.755928  
O 2.588492 -0.147473 1.227585  
C -3.053402 -0.189497 0.429287  
O -3.369918 -1.166733 -0.167048  
H -3.432996 0.096116 1.422272

**Z-1hk**

SCF = -399.328378256  
Num. Imaginary Freq = 0

C -1.114978 -0.312557 -0.073704  
N -2.340267 -0.411072 -0.225085  
C 0.134690 -0.577028 -0.064600  
N 1.324119 -0.812110 -0.035525  
F -2.986541 0.768789 0.193885  
C 2.381923 0.039032 0.368731  
O 2.853657 0.871526 -0.334194  
H 2.752837 -0.225723 1.370292

**Z-1hl**

SCF = -759.713478673  
Num. Imaginary Freq = 0

C 0.678844 -0.726978 -0.023519  
N 1.892717 -0.825572 0.057804  
C -0.591946 -0.710494 -0.116297  
N -1.813727 -0.829634 -0.240415  
Cl -2.730544 0.625382 0.100490  
C 2.804570 0.208004 0.375690  
O 3.164843 1.028985 -0.405420  
H 3.198779 0.099876 1.398062

**Z-1ii**

SCF = -371.241811291  
Num. Imaginary Freq = 0

C -0.632121 -0.649568 0.000014  
N -1.867573 -0.773048 -0.000008  
C 0.631493 -0.648349 0.000014  
N 1.866699 -0.772012 -0.000010  
C -2.700766 0.273611 -0.000005  
N -3.507923 1.095000 0.000001  
C 2.700799 0.273495 -0.000006  
N 3.509307 1.093612 0.000003

**Z-1ij**

SCF = -483.515425302  
Num. Imaginary Freq = 0

C -0.222195 0.831833 -0.000335  
N -1.444208 1.010595 -0.000155  
C 1.042947 0.734773 -0.000266  
N 2.276531 0.785729 -0.000117  
N -2.230558 -0.251810 0.000036

O -2.528311 -0.652675 1.082190  
O -2.527386 -0.653763 -1.082000  
C 3.069291 -0.291298 0.000099  
N 3.841852 -1.144562 0.000450

**Z-1ik**

SCF = -378.215137396  
Num. Imaginary Freq = 0

C -1.063428 -0.374089 0.000170  
N -2.302661 -0.436757 0.000134  
C 0.192709 -0.535621 -0.000044  
N 1.396267 -0.784011 -0.000140  
F -2.862187 0.841318 0.000129  
C 2.377284 0.120829 -0.000210  
N 3.295007 0.815256 -0.000089

**Z-1il**

SCF = -738.601895250  
Num. Imaginary Freq = 0

C -0.738860 -0.667605 -0.000173  
N -1.968773 -0.793764 -0.000374  
C 0.527749 -0.702242 0.000036  
N 1.756882 -0.834603 0.000253  
Cl 2.659696 0.643313 0.000445  
C -2.823692 0.234022 -0.000426  
N -3.646110 1.039601 -0.000478

**Z-1jj**

SCF = -595.788125525  
Num. Imaginary Freq = 0

C -0.636612 0.925643 0.000079  
N -1.861756 1.034445 0.000137  
C 0.636663 0.925581 0.000013  
N 1.861809 1.034607 0.000079  
N -2.585423 -0.267923 -0.000009  
O -2.861033 -0.682626 1.081967  
O -2.861348 -0.682293 -1.082039  
N 2.585435 -0.267969 -0.000052  
O 2.861117 -0.682483 -1.082067  
O 2.861168 -0.682532 1.081934

**Z-1jk**

SCF = -490.485568227  
Num. Imaginary Freq = 0

C -1.440101 0.447404 0.000321  
N -2.677050 0.417992 0.000234  
C -0.195259 0.701760 0.000321  
N 0.991134 1.015041 0.000776  
F -3.145685 -0.895019 -0.000563  
N 1.930904 -0.135077 -0.000100  
O 2.275568 -0.494443 -1.081817  
O 2.275483 -0.496245 1.081173

**Z-1jl**

SCF = -850.874037700



Num. Imaginary Freq = 0

|    |           |           |           |
|----|-----------|-----------|-----------|
| C  | 0.331745  | 0.844466  | -0.000149 |
| N  | 1.549247  | 1.030336  | -0.000335 |
| C  | -0.938445 | 0.781183  | 0.000038  |
| N  | -2.167931 | 0.844625  | 0.000140  |
| Cl | -2.996452 | -0.672661 | 0.000417  |
| N  | 2.349567  | -0.219143 | -0.000242 |
| O  | 2.653640  | -0.619687 | -1.081535 |
| O  | 2.654324  | -0.618986 | 1.081115  |

### Z-1kk

SCF = -385.179387651

Num. Imaginary Freq = 0

|   |           |           |           |
|---|-----------|-----------|-----------|
| C | 0.633544  | -0.378130 | 0.000015  |
| N | 1.858966  | -0.542996 | 0.000029  |
| C | -0.633875 | -0.378620 | 0.000016  |
| N | -1.859182 | -0.543915 | -0.000052 |
| F | 2.530085  | 0.674547  | -0.000024 |
| F | -2.529695 | 0.675328  | 0.000021  |

### Z-1kl

SCF = -745.570255110

Num. Imaginary Freq = 0

|    |           |           |           |
|----|-----------|-----------|-----------|
| C  | -1.157981 | 0.421039  | 0.000048  |
| N  | -2.394580 | 0.469254  | 0.000096  |
| C  | 0.100864  | 0.593292  | -0.000034 |
| N  | 1.298551  | 0.864294  | -0.000114 |
| Cl | 2.382001  | -0.472813 | 0.000048  |
| F  | -2.942124 | -0.820334 | -0.000086 |

### Z-1ll

SCF = -1105.95852912

Num. Imaginary Freq = 0

|    |           |           |           |
|----|-----------|-----------|-----------|
| C  | -0.636008 | 0.721005  | 0.001529  |
| N  | -1.859247 | 0.862521  | -0.000564 |
| C  | 0.635939  | 0.720842  | 0.000415  |
| N  | 1.859185  | 0.862278  | -0.000943 |
| Cl | 2.778456  | -0.609496 | 0.000064  |
| Cl | -2.778406 | -0.609602 | -0.000130 |

## Carbodiimides 2

### 2aa

SCF = -148.792222093

Num. Imaginary Freq = 0

|   |           |           |           |
|---|-----------|-----------|-----------|
| C | 0.000026  | -0.012194 | 0.000210  |
| N | -1.208698 | 0.076587  | -0.101108 |
| H | -1.799594 | -0.502190 | 0.476906  |
| N | 1.208726  | 0.078951  | 0.099261  |
| H | 1.799241  | -0.513412 | -0.465241 |

### 2ab

SCF = -188.097980195

Num. Imaginary Freq = 0

|   |           |           |           |
|---|-----------|-----------|-----------|
| C | -0.676867 | -0.118870 | -0.011041 |
| N | -1.855090 | 0.179744  | 0.128796  |
| H | -2.403804 | 0.346606  | -0.702617 |
| N | 0.461593  | -0.516544 | -0.020852 |
| C | 1.691319  | 0.242225  | -0.000342 |
| H | 2.293620  | -0.082745 | 0.847961  |
| H | 2.256648  | 0.035330  | -0.909266 |
| H | 1.521306  | 1.318286  | 0.076610  |

### 2ac

SCF = -204.104955194

Num. Imaginary Freq = 0

|   |           |           |           |
|---|-----------|-----------|-----------|
| C | -0.641300 | 0.118517  | 0.005709  |
| N | -1.820260 | -0.188205 | -0.116418 |
| H | -2.362882 | -0.238952 | 0.737649  |
| N | 0.502105  | 0.525585  | -0.041393 |
| N | 1.635242  | -0.282815 | 0.137101  |
| H | 1.567919  | -1.114307 | -0.440642 |
| H | 2.423156  | 0.260195  | -0.186289 |

### 2ad

SCF = -282.724668339

Num. Imaginary Freq = 0

|   |           |           |           |
|---|-----------|-----------|-----------|
| C | 1.428922  | 0.304109  | -0.005229 |
| N | 2.590959  | -0.034997 | 0.187697  |
| H | 3.199108  | -0.017353 | -0.622922 |
| N | 0.293003  | 0.734307  | -0.039995 |
| N | -0.848380 | 0.003798  | -0.377921 |
| C | -0.777554 | -1.382143 | 0.045347  |
| H | -0.656100 | -1.480050 | 1.133973  |
| H | -1.696767 | -1.883053 | -0.256067 |
| H | 0.059623  | -1.877298 | -0.448128 |
| C | -2.016140 | 0.696360  | 0.134058  |
| H | -2.907020 | 0.199587  | -0.249749 |
| H | -2.054934 | 0.702473  | 1.232596  |
| H | -2.004354 | 1.723975  | -0.223236 |

### 2ae

SCF = -263.254927623

Num. Imaginary Freq = 0

|   |           |           |           |
|---|-----------|-----------|-----------|
| C | -1.234763 | 0.111106  | 0.009139  |
| N | -2.424767 | -0.111817 | -0.123965 |
| H | -2.962553 | -0.242569 | 0.725580  |
| N | -0.065356 | 0.483370  | 0.009901  |
| O | 0.900782  | -0.522906 | -0.007990 |
| C | 2.178097  | 0.084514  | 0.007922  |
| H | 2.886157  | -0.742132 | -0.009321 |
| H | 2.322104  | 0.716529  | -0.871372 |

H 2.318898 0.676834 0.915118

SCF = -353.274705260  
Num. Imaginary Freq = 0

### 2af

SCF = -586.290170071  
Num. Imaginary Freq = 0

C -1.583681 0.193207 0.009453  
N -2.785483 0.025794 -0.118688  
H -3.349116 -0.058350 0.716486  
N -0.400506 0.460064 -0.001292  
S 0.888950 -0.632645 -0.000908  
C 2.230000 0.552813 0.008549  
H 3.146001 -0.039720 0.004175  
H 2.201768 1.177818 -0.882104  
H 2.202152 1.165442 0.907821

C 1.279442 -0.288305 0.021964  
N 2.395250 0.101829 -0.153509  
H 3.012565 0.431714 0.572642  
N 0.167878 -0.836447 0.078148  
N -0.951444 0.056696 0.007098  
O -2.011944 -0.489667 -0.045904  
O -0.734433 1.245113 0.017581

### 2ak

SCF = -247.952153164  
Num. Imaginary Freq = 0

C 0.572040 -0.131636 0.008540  
N 1.729120 0.195358 -0.128599  
H 2.271922 0.382243 0.707635  
N -0.565932 -0.625453 0.020116  
F -1.538497 0.379804 0.000056

### 2ag

SCF = -485.891867584  
Num. Imaginary Freq = 0

C -1.592662 -0.260141 -0.074168  
N -2.731304 0.068896 0.137060  
H -3.325640 0.470171 -0.571206  
N -0.472541 -0.730422 -0.186733  
C 0.726483 -0.018945 -0.006619  
F 1.442874 -0.565515 0.972122  
F 1.456242 -0.059551 -1.119706  
F 0.539731 1.273403 0.303545

### 2al

SCF = -608.351160064  
Num. Imaginary Freq = 0

C -1.061519 0.159443 0.010467  
N -2.173507 -0.300435 -0.127589  
H -2.710236 -0.550133 0.692847  
N 0.012640 0.755386 0.019488  
Cl 1.423848 -0.211246 0.000062

### 2ah

SCF = -262.121040337  
Num. Imaginary Freq = 0

C 1.141692 -0.129790 0.003211  
N 2.307096 0.159457 -0.086582  
H 2.940669 0.242463 0.691115  
N -0.021093 -0.506565 -0.038975  
C -1.140321 0.342956 -0.022969  
O -2.256209 -0.063762 0.050084  
H -0.901242 1.418394 -0.094345

### 2ai

SCF = -241.011955897  
Num. Imaginary Freq = 0

C -1.047342 0.093144 0.015657  
N -2.174333 -0.288711 -0.121219  
H -2.802073 -0.556034 0.619158  
N 0.060919 0.614156 0.018880  
C 1.258879 0.047947 0.004248  
N 2.332392 -0.366947 -0.003174

### 2aj
